# Supplementary material for: Palladium-catalyzed asymmetric (4 + 3) cycloaddition of N-2,2,2-trifluoroethylisatin ketimines: access to optically active spirooxindoles
Source: Royal Society of Chemistry journal article supplement (doi:10.1039/d3qo00501a), 2023-01-01
Supplement: d3qo00501a1.pdf [file d3qo00501a1.pdf]

# *Supporting Information*

## **Palladium-Catalyzed Asymmetric (4+3) Cycloaddition of N-2,2,2-Trifluoroethylisatin Ketimines: Access to Optically Active Spirooxindoles**

Yinggao Meng, Manman Song, Yue Wang, Yuxin Wang and Er-Qing Li \*

College of Chemistry, Green Catalysis Center, Zhengzhou University, Zhengzhou 450001, P. R. China General Experimental Details.

|                                                                                         |     |
|-----------------------------------------------------------------------------------------|-----|
| 1. General Experimental Details .....                                                   | S1  |
| 2. Optimization of the Reaction Conditions .....                                        | S2  |
| 2.1. Optimization of reaction conditions.....                                           | S2  |
| 3. The data of compound 1j, 1k, 1p-1x. ....                                             | S3  |
| 4. General Procedure for Reactions .....                                                | S7  |
| 5. Copies of <sup>1</sup> H NMR, <sup>13</sup> C NMR, <sup>19</sup> F NMR Spectra ..... | S22 |
| 6. Copies of HPLC Chromatograms .....                                                   | S68 |
| 7. Scale-up Synthesis .....                                                             | S92 |
| 8. X-ray crystal structure.....                                                         | S96 |

## 1. General Experimental Details

All reactions were performed under nitrogen using solvents dried by standard methods. NMR spectra were obtained using Bruker AV300 spectrometer. Chemical shifts are expressed in parts per million (ppm) downfield from internal TMS. HRMS spectra were obtained on an Agilent 1290-6540 UHPLC Q-ToF HR-MS spectrometer. X-ray crystallographic analyses were performed on an Oxford diffraction Gemini Ediffractometer. Melting Point: heating rate: 4°C/min, the thermometer was not corrected. Enantiomer excesses were determined by chiral HPLC analysis on Chiralcel IG/AD-H/IB-N-5 in comparison with the authentic racemates. Chiral HPLC analysis recorded on Shanghaiyice instruments and Equipment Co. Ltd. and Shimadzu LC-20A. Silica gel (200-300 mesh) was used for the chromatographic separations. All commercially available reagents were used without further purification. The compound **1**<sup>[1]</sup> and **2a**<sup>[2]</sup> were prepared according to literature methods.

## 2. Optimization of the Reaction Conditions

### 2.1. Optimization of reaction conditions.

**Table S1.** Screening of the solvents. <sup>a</sup>

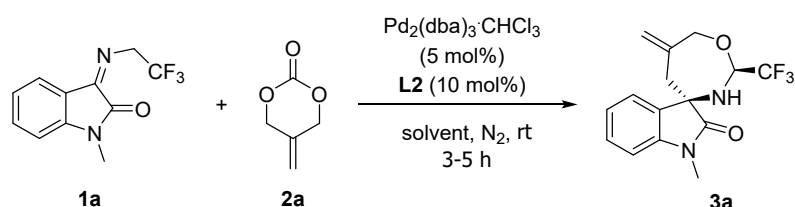

| entry | solvent               | yield <sup>b</sup> | dr <sup>c</sup> | ee <sup>d</sup> |
|-------|-----------------------|--------------------|-----------------|-----------------|
| 1     | THF                   | 43%                | >20:1           | 92%             |
| 2     | MTBE                  | 60%                | >20:1           | 94%             |
| 3     | $\text{Et}_2\text{O}$ | 55%                | 20:1            | 84%             |
| 4     | 1,4-dioxane           | 35%                | >20:1           | 96%             |
| 5     | EA                    | 49%                | >20:1           | 92%             |
| 6     | toluene               | 30%                | 9:1             | 80%             |
| 7     | DCM                   | 38%                | 15:1            | 64%             |

<sup>a</sup> Reaction conditions: under  $\text{N}_2$ , the mixture of **1a** (0.1 mmol), **2a** (0.15 mmol),  $\text{Pd}_2(\text{dba})_3 \cdot \text{CHCl}_3$  (5 mol%), **L2** (10 mol%) in solvent (1.0 mL) at room temperature for 3-20 h. <sup>b</sup> Isolated yield.

<sup>c</sup> Determined by  $^1\text{H}$  NMR analysis. <sup>d</sup> Determined by HPLC analysis.

**Table S2.** Screening of the Pd catalysts. <sup>a</sup>

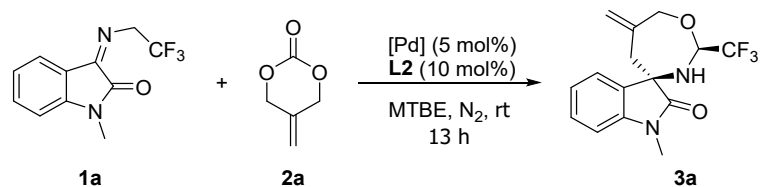

| entry | [Pd]                                            | yield <sup>b</sup> | dr <sup>c</sup> | ee <sup>d</sup> |
|-------|-------------------------------------------------|--------------------|-----------------|-----------------|
| 1     | $\text{Pd}_2(\text{dba})_3 \cdot \text{CHCl}_3$ | 60%                | >20:1           | 94%             |
| 2     | $\text{Pd}_2(\text{dba})_3$                     | 44%                | >20:1           | 80%             |

|   |                              |     |       |     |
|---|------------------------------|-----|-------|-----|
| 3 | Pd(dba) <sub>2</sub>         | 49% | >20:1 | 60% |
| 4 | Pd(OAc) <sub>2</sub>         | x   | x     | x   |
| 5 | [Pd(η-allyl)Cl] <sub>2</sub> | x   | x     | x   |

<sup>a</sup> Reaction conditions: under N<sub>2</sub>, the mixture of **1a** (0.1 mmol), **2a** (0.15 mmol), [Pd] (5 mol%), **L2** (10 mol%) in MBTE (1.0 mL) at room temperature for 13 h. <sup>b</sup> Isolated yield. <sup>c</sup> Determined by <sup>1</sup>H NMR analysis. <sup>d</sup> Determined by HPLC analysis.

**Table S3.** Screening of loading of Pd catalyts. <sup>a</sup>

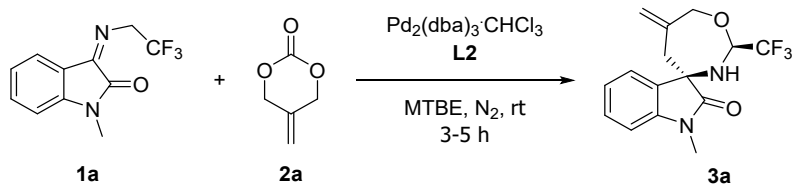

| entry | Pd <sub>2</sub> (dba) <sub>3</sub> ·CHCl <sub>3</sub> | L3       | yield <sup>b</sup> | dr <sup>c</sup> | ee <sup>d</sup> |
|-------|-------------------------------------------------------|----------|--------------------|-----------------|-----------------|
| 1     | 3 mol%                                                | 6 mol %  | 46%                | >20:1           | 90%             |
| 2     | 4 mol %                                               | 8 mol %  | 44%                | >20:1           | 84%             |
| 3     | 5 mol %                                               | 10 mol % | 60%                | >20:1           | 94%             |
| 4     | 5 mol %                                               | 15 mol % | 41%                | >20:1           | 94%             |
| 5     | 5.5 mol %                                             | 11 mol % | 49%                | >20:1           | 90%             |
| 6     | 6 mol %                                               | 12 mol % | 55%                | >20:1           | 92%             |
| 7     | 7 mol %                                               | 14 mol % | 51%                | >20:1           | 94%             |

<sup>a</sup> Reaction conditions: under N<sub>2</sub>, the mixture of **1a**, (0.1 mmol), **2a** (0.15 mmol), in MBTE (1.0 mL) at room temperature for 13 h. <sup>b</sup> Isolated yield. <sup>c</sup> Determined by <sup>1</sup>H NMR analysis. <sup>d</sup> Determined by HPLC analysis.

### 3. The data of compound 1j, 1k, 1p-1x.

The compounds 1j, 1k, 1p - 1x were prepared according to previous literature.<sup>[1]</sup>

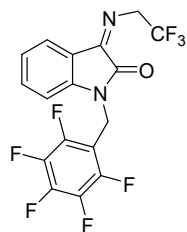

**(Z)-1-((perfluorophenyl) methyl)-3-((2, 2, 2-trifluoroethyl) imino)indolin-2-one**

**1j.**

Yellow solid.  $^1\text{H NMR}$  (400 MHz,  $\text{CDCl}_3$ )  $\delta$  7.76 (d,  $J = 6.9$  Hz, 1H), 7.47 (td,  $J = 7.9, 1.0$  Hz, 1H), 7.17 (t,  $J = 7.5$  Hz, 1H), 6.88 (d,  $J = 7.9$  Hz, 1H), 5.02 (s, 2H), 4.85 (q,  $J = 9.7$  Hz, 2H) ppm;  $^{13}\text{C NMR}$  (101 MHz,  $\text{CDCl}_3$ )  $\delta$  159.0, 154.6, 150.6, 141.3, 136.2, 126.5, 125.7, 124.4, 121.7, 116.2, 53.8, 44.4, 34.5, 31.3 ppm; **HRMS** (m/z)(m/z)  $[\text{M}+\text{H}]^+$  Calcd for  $\text{C}_{17}\text{H}_9\text{F}_8\text{N}_2\text{O}^+$   $[\text{M}+\text{Na}]^+$  : 431.0401, found 431.0402.

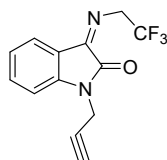

**(Z)-1-(prop-2-yn-1-yl)-3-((2, 2, 2-trifluoroethyl)imino)indolin-2-one 1k.**

Yellow solid.  $^1\text{H NMR}$  (400 MHz,  $\text{CDCl}_3$ )  $\delta$  7.76 (d,  $J = 7.5$  Hz, 1H), 7.54 – 7.48 (m, 1H), 7.20 – 7.15 (m, 1H), 7.08 (d,  $J = 7.9$  Hz, 1H), 4.84 (q,  $J = 9.7$  Hz, 2H), 4.53 (d,  $J = 2.4$  Hz, 2H), 2.31 (t,  $J = 2.4$  Hz, 1H) ppm;  $^{13}\text{C NMR}$  (101 MHz,  $\text{CDCl}_3$ )  $\delta$  157.5, 155.2, 144.4, 133.8, 123.8, 123.2, 120.7, 109.8, 76.1, 72.9, 53.8, 53.6, 29.0 ppm; **HRMS** (m/z)(m/z)  $[\text{M}+\text{H}]^+$  Calcd for  $\text{C}_{13}\text{H}_{10}\text{F}_3\text{N}_2\text{O}^+$   $[\text{M}+\text{Na}]^+$  : 267.0740, found 267.0739.

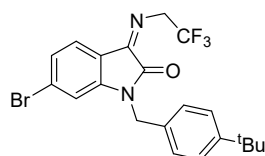

**(Z)-6-bromo-1-(4-(tert-butyl) benzyl)-3-((2, 2, 2-trifluoroethyl) imino) indolin-2-one 1p.**

Yellow solid.  $^1\text{H NMR}$  (400MHz,  $\text{CDCl}_3$ )  $\delta$  7.60 (d,  $J = 8.0$  Hz, 1H), 7.42 – 7.39 (m, 2H), 7.29 – 7.25 (m, 3H), 6.99 (d,  $J = 1.4$  Hz, 1H), 4.86 (m, 4H), 1.33 (s, 9H) ppm;  $^{13}\text{C NMR}$  (101 MHz,  $\text{CDCl}_3$ )  $\delta$  158.3, 154.7, 151.3, 131.4, 128.0, 127.1, 126.6, 126.1, 124.2, 113.2, 53.9, 34.6, 31.3 ppm. **HRMS** (m/z)(m/z)  $[\text{M}+\text{H}]^+$  Calcd for  $\text{C}_{21}\text{H}_{21}\text{BrF}_3\text{N}_2\text{O}^+$ : 453.0787, found 453.0784.

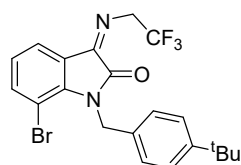

**(Z)-7-bromo-1-(4-(tert-butyl) benzyl)-3-((2, 2, 2-trifluoroethyl) imino)indolin-2-one 1q.**

Yellow solid.  $^1\text{H NMR}$  (400 MHz,  $\text{CDCl}_3$ )  $\delta$  7.76 (dd,  $J = 7.4, 0.9$  Hz, 1H), 7.57 (dd,  $J = 8.1, 0.9$  Hz, 1H), 7.39 – 7.35 (m, 2H), 7.22 (d,  $J = 8.3$  Hz, 2H), 7.06 – 6.97 (m, 1H), 5.42 (s, 2H), 4.86 (q,  $J = 9.7$  Hz, 2H), 1.32 (s, 9H) ppm;  $^{13}\text{C NMR}$  (101 MHz,  $\text{CDCl}_3$ )  $\delta$  159.2, 154.5, 150.5, 142.8, 139.5, 133.3, 126.4, 125.7, 124.7, 122.3, 103.2, 54.2, 53.9, 43.9, 34.5, 31.3 ppm; **HRMS** (m/z)(m/z)  $[\text{M}+\text{H}]^+$  Calcd for  $\text{C}_{21}\text{H}_{21}\text{BrF}_3\text{N}_2\text{O}^+ [\text{M}+\text{H}]^+$  : 453.0784, found 453.0788.

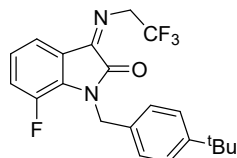

**(Z)-1-(4-(tert-butyl)benzyl)-7-fluoro-3-((2, 2, 2-trifluoroethyl)imino)indolin-2-one**  
**1r.**

Yellow solid.  $^1\text{H NMR}$  (400 MHz,  $\text{CDCl}_3$ )  $\delta$  7.61 – 7.49 (m, 1H), 7.44 – 7.25 (m, 4H), 7.18 (m, 1H), 7.10 – 6.94 (m, 1H), 5.04 (d,  $J = 19.0$  Hz, 2H), 4.88 (m, 2H), 1.32 (d,  $J = 18.6$  Hz, 9H) ppm;  $^{13}\text{C NMR}$  (101 MHz,  $\text{CDCl}_3$ )  $\delta$  158.3, 158.3, 155.0, 151.0, 133.1, 133.0, 127.6, 125.7, 124.2, 124.1, 123.5, 122.0, 121.9, 121.8, 121.7, 119.1, 53.9, 53.6, 53.5, 45.2, 34.6, 34.5, 31.3 ppm; **HRMS** (m/z)(m/z)  $[\text{M}+\text{H}]^+$  Calcd for  $\text{C}_{21}\text{H}_{21}\text{F}_4\text{N}_2\text{O}^+ [\text{M}+\text{H}]^+$  : 393.1585, found 393.1583.

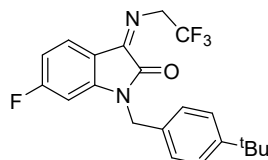

**(Z)-1-(4-(tert-butyl)benzyl)-6-fluoro-3-((2, 2, 2-trifluoroethyl)imino)indolin-2-one**  
**1s.**

Yellow solid.  $^1\text{H NMR}$  (400 MHz,  $\text{CDCl}_3$ )  $\delta$  7.73 (dd,  $J = 8.2, 5.6$  Hz, 1H), 7.41 (d,  $J = 8.2$  Hz, 2H), 7.27 (d,  $J = 8.1$  Hz, 2H), 6.82 – 6.73 (m, 2H), 6.55 (dd,  $J = 8.7, 1.7$  Hz, 1H), 4.89 (m, 4H), 1.33 (s, 9H) ppm;  $^{13}\text{C NMR}$  (101 MHz,  $\text{CDCl}_3$ )  $\delta$  167.6, 165.1, 154.3, 151.3, 147.6, 147.5, 131.4, 127.2, 126.0, 125.1, 125.0, 110.2, 110.0, 98.9, 98.6, 53.7, 53.4, 53.1, 43.5, 34.6, 31.3 ppm; **HRMS** (m/z)(m/z)  $[\text{M}+\text{H}]^+$  Calcd for  $\text{C}_{21}\text{H}_{21}\text{F}_4\text{N}_2\text{O}^+ [\text{M}+\text{H}]^+$  : 393.1585, found 393.1588.

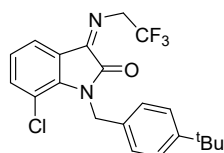

**(Z)-1-(4-(*tert*-butyl)benzyl)-7-chloro-3-((2, 2, 2-trifluoroethyl)imino) indolin-2-one 1t.**

Yellow solid.  $^1\text{H NMR}$  (400 MHz,  $\text{CDCl}_3$ )  $\delta$  7.73 – 7.70 (m, 1H), 7.40 – 7.37 (m, 3H), 7.26 (d,  $J = 8.4$  Hz, 2H), 7.09 – 7.05 (m, 1H), 5.37 (s, 2H), 4.88 (q,  $J = 9.7$  Hz, 2H), 1.33 (s, 9H);  $^{13}\text{C NMR}$  (101 MHz,  $\text{CDCl}_3$ )  $\delta$  159.0, 154.6, 150.6, 141.3, 136.2, 126.5, 125.7, 124.4, 121.7, 116.2, 53.8, 44.4, 34.5, 31.3 ppm; HRMS (m/z)(m/z)  $[\text{M}+\text{H}]^+$  Calcd for  $\text{C}_{21}\text{H}_{21}\text{ClF}_3\text{N}_2\text{O}^+$   $[\text{M}+\text{H}]^+$  : 409.1289, found 409.1292.

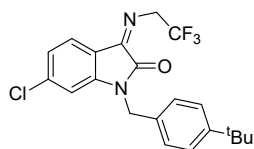

**(Z)-1-(4-(*tert*-butyl) benzyl)-6-chloro-3-((2, 2, 2-trifluoroethyl) imino) indolin-2-one 1u.**

Yellow solid.  $^1\text{H NMR}$  (400MHz,  $\text{CDCl}_3$ )  $\delta$  7.67 (d,  $J = 8.0$  Hz, 1H), 7.40 (m,  $J = 8.3$  Hz, 2H), 7.29 – 7.25 (m, 2H), 7.09 (dd,  $J = 8.0, 1.7$  Hz, 1H), 6.82 (d,  $J = 1.6$  Hz, 1H), 4.89 – 4.86 (m, 3H), 1.33 (s, 9H) ppm;  $^{13}\text{C NMR}$  (101 MHz,  $\text{CDCl}_3$ )  $\delta$  158.5, 154.6, 127.1, 126.1, 124.1, 123.6, 119.1, 53.9, 53.6, 43.5, 34.6, 31.3 ppm; HRMS (m/z)(m/z)  $[\text{M}+\text{H}]^+$  Calcd for  $\text{C}_{21}\text{H}_{21}\text{ClF}_3\text{N}_2\text{O}^+$   $[\text{M}+\text{H}]^+$  : 409.1289, found 409.1295.

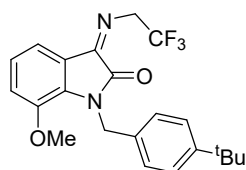

**(Z)-1-(4-(*tert*-butyl)benzyl)-7-methoxy-3-((2, 2, 2-trifluoroethyl)imino)indolin- 2-one 1w.**

Yellow solid.  $^1\text{H NMR}$  (400 MHz,  $\text{CDCl}_3$ )  $\delta$  7.39 – 7.35 (m, 3H), 7.31 (m, 2H), 7.07 – 7.01 (m, 2H), 5.17 (s, 2H), 4.88 (q,  $J = 9.5$  Hz, 2H), 3.83 (s, 3H), 1.33 (s, 9H) ppm;  $^{13}\text{C NMR}$  (101 MHz,  $\text{CDCl}_3$ )  $\delta$  158.9, 156.1, 150.4, 145.2, 134.5, 133.7, 127.4, 125.4, 124.0, 122.3, 117.7, 115.6, 55.9, 54.2, 53.8, 53.5, 45.4, 34.5, 31.3 ppm; HRMS (m/z)(m/z)  $[\text{M}+\text{H}]^+$  Calcd for  $\text{C}_{22}\text{H}_{24}\text{F}_3\text{N}_2\text{O}_2^+$   $[\text{M}+\text{H}]^+$  : 405.1784, found 405.1784.

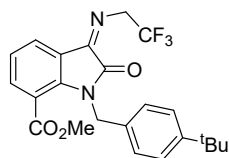

**methyl (Z)-1-(4-(tert-butyl)benzyl)-2-oxo-3-((2, 2, 2-trifluoroethyl)imino)indoline-7-carboxylate 1x**

Yellow solid.  $^1\text{H NMR}$  (400 MHz,  $\text{CDCl}_3$ )  $\delta$  7.90 (dd,  $J = 7.4, 1.2$  Hz, 1H), 7.60 – 7.52 (dd,  $J = 8.0, 4.0$  Hz, 1H), 7.28 (m, 3H, overlapped with the peak of chloroform), 7.12 (t,  $J = 7.7$  Hz, 1H), 6.99 (d,  $J = 8.3$  Hz, 2H), 5.25 (s, 2H), 4.89 (q,  $J = 9.8$  Hz, 2H), 3.61 (s, 3H), 1.28 (s, 9H) ppm;  $^{13}\text{C NMR}$  (101 MHz,  $\text{CDCl}_3$ )  $\delta$  166.3, 159.3, 154.4, 150.5, 143.3, 134.4, 131.7, 125.5, 122.7, 122.5, 118.0, 54.2, 53.8, 52.5, 44.5, 34.5, 31.3, 29.7 ppm; **HRMS** ( $m/z$ )( $m/z$ )  $[\text{M}+\text{H}]^+$  Calcd for  $\text{C}_{22}\text{H}_{24}\text{F}_3\text{N}_2\text{O}_3^+$   $[\text{M}+\text{H}]^+$  : 433.1734, found 433.1732.

#### 4. General Procedure for Reactions

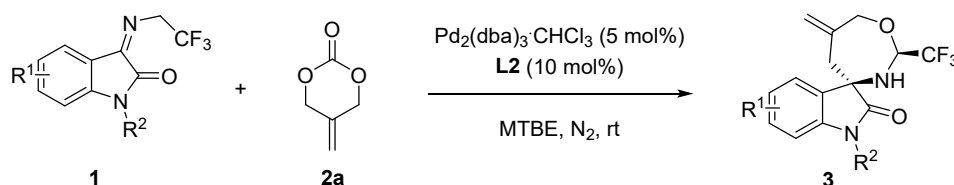

To a flame dried sealing tube,  $\text{Pd}_2(\text{dba})_3 \cdot \text{CHCl}_3$  (0.005 mmol, 5.2 mg), **L2** (0.01 mmol, 5.4 mg), freshly distilled anhydrous MTBE (1.0 mL) were added. The resulting mixture was allowed to stir for 30 min. Then, compound **1** (0.1 mmol) and compound **2a** (0.15 mmol) were added subsequently. The resulting reaction mixture was stirred at room temperature for 3 h (monitored by TLC). The residue was subjected to column chromatography on silica gel, using a mixture of petroleum ether and ethyl acetate as eluent, to give desired product **3**.



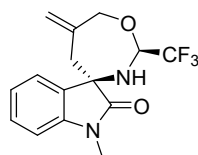

**3a:** Purified by silica gel chromatography using PE/EA 6:1, white solid, 60% yield, 18.7 mg, 94% ee, dr > 20:1; MP: 127.6-128.4°C.  $[\alpha]_D = +31$  ( $c = 0.1$ ,  $\text{CH}_2\text{Cl}_2$ , 32.1 °C).  **$^1\text{H NMR}$  (300 MHz,  $\text{CDCl}_3$ ):**  $\delta$  7.37-7.32 (m, 2H), 7.08 (t,  $J = 7.5$  Hz, 1H), 6.87 (d,  $J = 7.8$  Hz, 1H), 5.40 (dd,  $J = 9.9, 4.8$  Hz, 1H), 5.25 (s, 1H), 5.00 (s, 1H), 4.58 (d,  $J = 13.5$  Hz, 1H), 4.37 (d,  $J = 13.2$  Hz, 1H), 3.20 (s, 3H), 2.88 (d,  $J = 14.1$  Hz, 1H), 2.71 (d,  $J = 13.8$  Hz, 1H), 2.44 (d,  $J = 10.2$  Hz, 1H) ppm.  **$^{13}\text{C NMR}$  (75 MHz,  $\text{CDCl}_3$ ):**  $\delta$  177.1, 142.8, 140.6, 131.5, 129.6, 122.9, 122.5 (q,  $J = 279.75$  Hz), 122.4, 119.1, 108.6, 82.2 (q,  $J = 33.00$  Hz), 74.0, 59.6, 44.4, 26.2 ppm.  **$^{19}\text{F NMR}$  (282 MHz,  $\text{CDCl}_3$ )**  $\delta$  -80.86 (d,  $J = 5.6$  Hz) ppm. **HRMS** ( $m/z$ )  $[\text{M}+\text{Na}]^+$  Calcd for  $\text{C}_{15}\text{H}_{15}\text{F}_3\text{N}_2\text{NaO}_2^+$  335.0983, found 335.0984. **HPLC** (Chiralpak IG-H, *n*-hexane/*i*-propanol = 99.2/0.8, flow rate = 1.0 mL/min,  $l = 254$  nm) tR = 34.48 min (major), 47.72 min (minor).

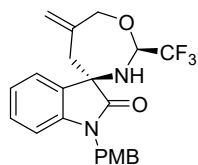

**3b:** Purified by silica gel chromatography using PE/EA 5:1, yellow oil, 58% yield, 24.2 mg, 88% ee, dr > 20:1;  $[\alpha]_D = +37$  ( $c = 0.1$ ,  $\text{CH}_2\text{Cl}_2$ , 33.0 °C).  **$^1\text{H NMR}$  (300 MHz,  $\text{CDCl}_3$ ):**  $\delta$  7.32 (d,  $J = 7.3$  Hz, 1H), 7.24-7.20 (m, 3H), 7.05-7.00 (m, 1H), 6.86-6.83 (m, 2H), 6.76 (d,  $J = 7.8$  Hz, 1H), 5.45 (dd,  $J = 9.6, 4.5$  Hz, 2H), 5.26 (s, 1H), 5.01 (s, 1H), 4.88 (d,  $J = 15.3$  Hz, 1H), 4.77 (d,  $J = 15.6$  Hz, 1H), 4.60 (d,  $J = 13.2$  Hz, 1H), 4.38 (d,  $J = 13.2$  Hz, 1H), 3.77 (s, 3H), 2.92 (d,  $J = 14.1$  Hz, 1H), 2.76 (d,  $J = 14.1$  Hz, 1H), 2.47 (d,  $J = 5.1$  Hz, 1H) ppm.  **$^{13}\text{C NMR}$  (75 MHz,  $\text{CDCl}_3$ ):**  $\delta$  177.2, 159.1, 141.8, 140.6, 131.7, 129.4, 128.5, 127.6, 122.8, 122.5 (q,  $J = 279.00$  Hz), 122.4, 119.2, 114.3, 109.6, 82.2 (q,  $J = 32.25$  Hz), 74.1, 59.6, 55.3, 44.5, 43.0 ppm.  **$^{19}\text{F NMR}$  (282 MHz,  $\text{CDCl}_3$ )**  $\delta$  -80.87 (d,  $J = 5.6$  Hz) ppm. **HRMS** ( $m/z$ )  $[\text{M} + \text{H}]^+$  Calcd for  $\text{C}_{22}\text{H}_{22}\text{F}_3\text{N}_2\text{O}_3^+$  419.1583, found 419.1588. **HPLC** (Chiralpak AD-H, *n*-

hexane/*i*-propanol = 95/5, flow rate = 1.0 mL/min,  $\lambda$  = 254 nm) tR = 15.42 min (major), 19.71 min (minor).

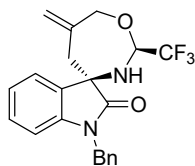

**3c:** Purified by silica gel chromatography using PE/EA 5:1, yellow oil, 53% yield, 22.5 mg, 91% ee, dr > 20:1;  $[\alpha]_D = +17$  ( $c = 0.1$ , CH<sub>2</sub>Cl<sub>2</sub>, 33.4 °C). **<sup>1</sup>H NMR (300 MHz, CDCl<sub>3</sub>):**  $\delta$  7.35-7.19 (m, 6H), 7.03 (t,  $J = 7.5$  Hz, 1H), 6.74 (d,  $J = 7.8$  Hz, 1H), 5.45 (dd,  $J = 10.2, 4.8$  Hz, 1H), 5.26 (s, 1H), 5.02 (s, 1H), 4.96 (d,  $J = 15.9$  Hz, 1H), 4.83 (d,  $J = 15.6$  Hz, 1H), 4.60 (d,  $J = 13.5$  Hz, 1H), 4.39 (d,  $J = 13.2$  Hz, 1H), 2.95 (d,  $J = 13.8$  Hz, 1H), 2.78 (d,  $J = 14.1$  Hz, 1H), 2.48 (d,  $J = 11.1$  Hz, 1H) ppm. **<sup>13</sup>C NMR (75 MHz, CDCl<sub>3</sub>):**  $\delta$  177.2, 141.8, 140.6, 135.6, 131.7, 129.5, 128.9, 127.7, 127.1, 122.9, 122.5 (q,  $J = 279.75$  Hz), 122.4, 119.2, 109.6, 82.2 (q,  $J = 33.00$  Hz), 74.1, 59.6, 44.5, 43.5 ppm. **<sup>19</sup>F NMR (282 MHz, CDCl<sub>3</sub>)**  $\delta$  -80.81 (d,  $J = 2.8$  Hz) ppm. **HRMS (m/z) [M + H]<sup>+</sup>** Calcd for C<sub>21</sub>H<sub>20</sub>F<sub>3</sub>N<sub>2</sub>O<sub>2</sub><sup>+</sup> 389.1477, found 389.1484. **HPLC** (Chiralpak AD-H, *n*-hexane/*i*-propanol = 98/2, flow rate = 1.0 mL/min,  $\lambda$  = 254 nm) tR = 17.86 min (major), 25.72 min (minor).

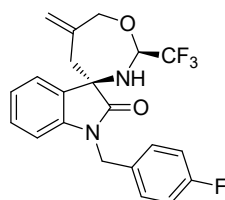

**3d:** Purified by silica gel chromatography using PE/EA 5:1, yellow oil, 73% yield, 29.6 mg, 88% ee, dr > 20:1;  $[\alpha]_D = +23$  ( $c = 0.1$ , CH<sub>2</sub>Cl<sub>2</sub>, 33.3 °C). **<sup>1</sup>H NMR (300 MHz, CDCl<sub>3</sub>):**  $\delta$  7.34 (d,  $J = 7.4$  Hz, 1H), 7.28-7.21 (m, 3H), 7.07-6.98 (m, 3H), 6.73 (d,  $J = 7.8$  Hz, 1H), 5.44 (td,  $J = 9.9, 5.1$  Hz, 1H), 5.27 (s, 1H), 5.02 (s, 1H), 4.86 (dd,  $J = 20.4, 15.6$  Hz, 2H), 4.60 (d,  $J = 13.2$  Hz, 1H), 4.39 (d,  $J = 13.2$  Hz, 1H), 2.93 (d,  $J = 13.8$  Hz, 1H), 2.77 (d,  $J = 14.1$  Hz, 1H), 2.47 (d,  $J = 11.7$  Hz, 1H) ppm. **<sup>13</sup>C NMR (75 MHz, CDCl<sub>3</sub>):**  $\delta$  177.2, 162.2 (d,  $J = 250.50$  Hz), 141.6, 140.5, 131.7, 131.3 (d,  $J = 3.75$  Hz), 129.5, 128.9, 128.8, 123.0, 122.6, 122.5 (q,  $J = 279.00$  Hz), 119.3, 115.9, 115.7, 109.5, 82.1 (q,  $J = 33.00$  Hz), 74.1, 59.5, 44.4, 42.8 ppm. **<sup>19</sup>F NMR (282 MHz,**

$\text{CDCl}_3$ )  $\delta$  -80.76 (d,  $J = 5.6$  Hz), -115.39 (d,  $J = 5.6$  Hz) ppm. **HRMS** (m/z)  $[\text{M} + \text{H}]^+$  Calcd for  $\text{C}_{21}\text{H}_{19}\text{F}_4\text{N}_2\text{O}_2^+$  407.1383, found 407.1383. **HPLC** (Chiralpak AD-H, *n*-hexane/*i*-propanol = 95/5, flow rate = 1.0 mL/min,  $\lambda = 254$  nm)  $t_R = 10.47$  min (major), 14.39 min (minor).

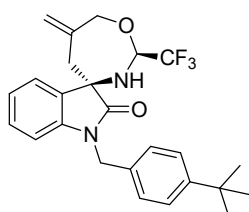

**3e:** Purified by silica gel chromatography using PE/EA 5:1, yellow oil, 78% yield, 34.6 mg, 94% ee, dr: 93:7;  $[\alpha]_D = +21$  ( $c = 0.1$ ,  $\text{CH}_2\text{Cl}_2$ , 29.8 °C).  **$^1\text{H}$  NMR (300 MHz,  $\text{CDCl}_3$ ):**  $\delta$  7.35-7.32 (m, 3H), 7.21 (d,  $J = 8.1$  Hz, 3H), 7.03 (t,  $J = 7.2$  Hz, 1H), 6.77 (d,  $J = 7.8$  Hz, 1H), 5.47 (dd,  $J = 10.5, 5.1$  Hz, 1H), 5.26 (s, 1H), 5.02 (s, 1H), 4.93 (d,  $J = 15.6$  Hz, 1H), 4.77 (d,  $J = 15.6$  Hz, 1H), 4.60 (d,  $J = 13.5$  Hz, 1H), 4.38 (d,  $J = 13.2$  Hz, 1H), 2.94 (d,  $J = 14.1$  Hz, 1H), 2.77 (d,  $J = 13.8$  Hz, 1H), 2.49 (d,  $J = 10.2$  Hz, 1H), 1.28 (s, 9H) ppm.  **$^{13}\text{C}$  NMR (75 MHz,  $\text{CDCl}_3$ )**  $\delta$  177.2, 150.7, 142.0, 140.6, 132.6, 131.7, 129.5, 126.9, 125.8, 122.8, 122.6 (q,  $J = 279.75$  Hz), 122.4, 119.2, 109.7, 82.2 (q,  $J = 32.25$  Hz), 74.1, 59.6, 44.6, 43.2, 34.5, 31.3 ppm.  **$^{19}\text{F}$  NMR (282 MHz,  $\text{CDCl}_3$ )**  $\delta$  -80.99 (d,  $J = 5.6$  Hz,) ppm. **HRMS** (m/z)  $[\text{M} + \text{H}]^+$  Calcd for  $\text{C}_{25}\text{H}_{28}\text{F}_3\text{N}_2\text{O}_2^+$  445.2103, found 445.2110. **HPLC** (Chiralpak AD-H, *n*-hexane/*i*-propanol = 99/1, flow rate = 1.0 mL/min,  $\lambda = 254$  nm)  $t_R = 24.38$  min (major), 34.79 min (minor).

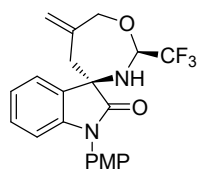

**3f:** Purified by silica gel chromatography using PE/EA 5:1, white solid, 50% yield, 20.2 mg, 92% ee, dr: 94 :6; MP: 102.5-104.3 °C.  $[\alpha]_D = +42$  ( $c = 0.1$ ,  $\text{CH}_2\text{Cl}_2$ , 29.4 °C).  **$^1\text{H}$  NMR (300 MHz,  $\text{CDCl}_3$ ):**  $\delta$  7.41-7.24 (m, 4H), 7.12-7.02 (m, 3H), 6.82 (d,  $J = 7.8$  Hz, 1H), 5.43 (dd,  $J = 9.3, 4.5$  Hz, 1H), 5.27 (s, 1H), 5.05 (s, 1H), 4.60 (d,  $J = 13.3$  Hz, 1H), 4.38 (d,  $J = 13.2$  Hz, 1H), 3.86 (s, 3H), 3.00 (d,  $J = 14.1$  Hz, 1H), 2.83

(d,  $J = 13.8$  Hz, 1H), 2.51 (d,  $J = 10.2$  Hz, 1H) ppm.  $^{13}\text{C}$  NMR (75 MHz,  $\text{CDCl}_3$ ):  $\delta$  176.6, 159.2, 143.1, 140.5, 131.3, 129.5, 127.8, 126.5, 123.2, 122.7, 122.5(q,  $J = 279.75$  Hz), 119.3, 114.9, 109.8, 82.2 (q,  $J = 32.25$  Hz), 74.0, 59.6, 55.6, 44.7 ppm.  $^{19}\text{F}$  NMR (282 MHz,  $\text{CDCl}_3$ )  $\delta$  -80.83 (d,  $J = 5.6$  Hz) ppm. HRMS (m/z)  $[\text{M} + \text{H}]^+$  Calcd for  $\text{C}_{21}\text{H}_{20}\text{F}_3\text{N}_2\text{O}_3^+$  405.1426, found 405.1429. HPLC (Chiralpak AD, *n*-hexane/*i*-propanol = 80/20, flow rate = 1.0 mL/min,  $\lambda = 254$  nm) tR = 9.85 min (major), 12.63 min (minor).

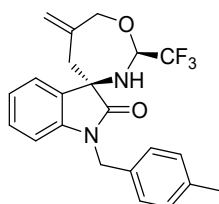

**3g:** Purified by silica gel chromatography using PE/EA 5:1, yellow oil, 65% yield, 26.1 mg, 94 % ee, dr: 97 :3;  $[\alpha]_{\text{D}} = +27$  ( $c = 0.1$ ,  $\text{CH}_2\text{Cl}_2$ , 30.9 °C).  $^1\text{H}$  NMR (300 MHz,  $\text{CDCl}_3$ ):  $\delta$  7.32 (d,  $J = 7.5$  Hz, 1H), 7.21-7.10 (m, 5H), 7.02 (t,  $J = 7.5$  Hz, 1H), 6.75 (d,  $J = 7.8$  Hz, 1H), 5.46 (dd,  $J = 10.5, 5.1$  Hz, 1H), 5.26 (s, 1H), 5.01 (s, 1H), 4.92 (d,  $J = 15.6$  Hz, 1H), 4.77 (d,  $J = 15.6$  Hz, 1H), 4.59 (d,  $J = 13.2$  Hz, 1H), 4.38 (d,  $J = 13.2$  Hz, 1H), 2.93 (d,  $J = 13.8$  Hz, 1H), 2.76 (d,  $J = 14.1$  Hz, 1H), 2.48 (d,  $J = 10.2$  Hz, 1H), 2.30 (s, 3H) ppm.  $^{13}\text{C}$  NMR (75 MHz,  $\text{CDCl}_3$ ):  $\delta$  177.2, 141.9, 140.6, 137.4, 132.6, 131.7, 129.5, 129.4, 127.2, 122.8, 122.6 (q,  $J = 279.00$  Hz), 122.4, 119.2, 109.7, 82.2 (q,  $J = 32.25$  Hz), 74.1, 59.6, 44.5, 43.3, 21.1 ppm.  $^{19}\text{F}$  NMR (282 MHz,  $\text{CDCl}_3$ )  $\delta$  -80.86 (d,  $J = 5.6$  Hz) ppm. HRMS (m/z)  $[\text{M} + \text{H}]^+$  Calcd for  $\text{C}_{22}\text{H}_{22}\text{F}_3\text{N}_2\text{O}_2^+$  403.1633, found 403.1640. HPLC (Chiralpak AD-H, *n*-hexane/*i*-propanol = 97/3, flow rate = 1.0 mL/min,  $\lambda = 254$  nm) tR = 13.86 min (major), 19.24 min (minor).

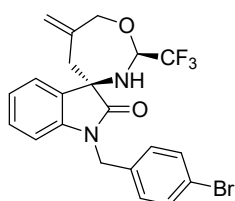

**3h:** Purified by silica gel chromatography using PE/EA 5:1, yellow oil, 67% yield, 31.2 mg, 88% ee, dr: 95 :5;  $[\alpha]_{\text{D}} = +21$  ( $c = 0.1$ ,  $\text{CH}_2\text{Cl}_2$ , 31 °C).  $^1\text{H}$  NMR (300 MHz,  $\text{CDCl}_3$ ):  $\delta$  7.44 (d,  $J = 8.3$  Hz, 2H), 7.35 (d,  $J = 7.4$  Hz, 1H), 7.23-7.14 (m, 3H), 7.05

(t,  $J = 7.5$  Hz, 1H), 6.70 (d,  $J = 7.8$  Hz, 1H), 5.42 (s, 1H), 5.27 (s, 1H), 5.02 (s, 1H), 4.83 (dd,  $J = 20.4, 15.9$  Hz, 2H), 4.60 (d,  $J = 13.3$  Hz, 1H), 4.38 (d,  $J = 13.2$  Hz, 1H), 2.93 (d,  $J = 14.0$  Hz, 1H), 2.78 (d,  $J = 14.0$  Hz, 1H), 2.48 (d,  $J = 11.5$  Hz, 1H) ppm.  $^{13}\text{C}$  NMR (75 MHz,  $\text{CDCl}_3$ ):  $\delta$  177.2, 141.5, 140.5, 134.6, 132.0, 131.6, 129.5, 128.9, 123.1, 122.6, 122.5(q,  $J = 279.75$  Hz), 121.7, 119.3, 109.4, 82.1(q,  $J = 33.00$  Hz), 74.1, 59.5, 44.4, 42.9 ppm.  $^{19}\text{F}$  NMR (282 MHz,  $\text{CDCl}_3$ )  $\delta$  -81.07 (d,  $J = 5.6$  Hz) ppm. HRMS (m/z)  $[\text{M} + \text{H}]^+$  Calcd for  $\text{C}_{21}\text{H}_{19}\text{BrF}_3\text{N}_2\text{O}_2^+$  467.0582, found 467.0590. HPLC (Chiralpak AD-H, *n*-hexane/*i*-propanol = 95/5, flow rate = 1.0 mL/min,  $\lambda = 254$  nm) tR = 12.80 min (major), 19.43 min (minor).

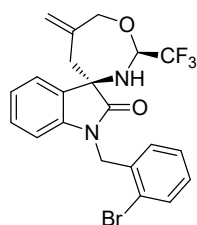

**3i:** Purified by silica gel chromatography using PE/EA 5:1, yellow oil, 63% yield, 29.3 mg, 90% ee, dr: 90 : 10;  $[\alpha]_{\text{D}} = +14$  ( $c = 0.1$ ,  $\text{CH}_2\text{Cl}_2$ , 28.6 °C).  $^1\text{H}$  NMR (300 MHz,  $\text{CDCl}_3$ ):  $\delta$  7.60-7.57 (m, 1H), 7.37 (d,  $J = 7.5$  Hz, 1H), 7.24-7.19 (m, 2H), 7.16-7.04 (m, 3H), 6.70 (d,  $J = 7.8$  Hz, 1H), 5.44 (td,  $J = 9.9, 4.8$  Hz, 1H), 5.28 (s, 1H), 5.05 (s, 1H), 5.00-4.92 (m, 2H), 4.61 (d,  $J = 13.2$  Hz, 1H), 4.39 (d,  $J = 13.2$  Hz, 1H), 2.98 (d,  $J = 14.1$  Hz, 1H), 2.83 (d,  $J = 14.1$  Hz, 1H), 2.52 (d,  $J = 10.8$  Hz, 1H) ppm.  $^{13}\text{C}$  NMR (75 MHz,  $\text{CDCl}_3$ ):  $\delta$  177.3, 141.6, 140.5, 134.2, 133.0, 131.6, 129.6, 129.2, 127.9, 127.7, 123.2, 122.8, 122.5(d,  $J = 279.75$  Hz), 122.5, 119.4, 109.7, 82.1(q,  $J = 33.00$  Hz), 74.1, 59.6, 44.4, 43.5 ppm.  $^{19}\text{F}$  NMR (282 MHz,  $\text{CDCl}_3$ )  $\delta$  -81.07 (d,  $J = 5.6$  Hz,) ppm. HRMS (m/z)  $[\text{M} + \text{H}]^+$  Calcd for  $\text{C}_{21}\text{H}_{19}\text{BrF}_3\text{N}_2\text{O}_2^+$  467.0582, found 467.0590. HPLC (Chiralpak IG-H, *n*-hexane/*i*-propanol = 90/10, flow rate = 1.0 mL/min,  $\lambda = 254$  nm) tR = 7.24 min (minor), 8.29 min (major).

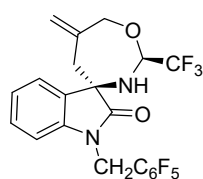

**3j:** Purified by silica gel chromatography using PE/EA 6:1, white solid, 66% yield, 31.5 mg, 92% ee, dr: 97 :3; MP: 108.2-110.8 °C.  $[\alpha]_D = +17$  ( $c = 0.1$ ,  $\text{CH}_2\text{Cl}_2$ , 29.6 °C).  **$^1\text{H NMR}$  (300 MHz,  $\text{CDCl}_3$ ):**  $\delta$  7.36-7.27 (m, 2H), 7.09 (t,  $J = 7.5$  Hz, 1H), 6.79 (d,  $J = 7.8$  Hz, 1H), 5.41 (d,  $J = 5.7$  Hz, 1H), 5.27 (s, 1H), 5.19 (d,  $J = 15.3$  Hz, 1H), 5.00 (s, 1H), 4.83 (d,  $J = 15.6$  Hz, 1H), 4.59 (d,  $J = 13.5$  Hz, 1H), 4.39 (d,  $J = 13.5$  Hz, 1H), 2.80 (dd,  $J = 27.3, 14.1$  Hz, 2H), 2.44 (s, 1H) ppm.  **$^{13}\text{C NMR}$  (75 MHz,  $\text{CDCl}_3$ ):**  $\delta$  176.2, 147.4-147.0 (m), 144.1-143.7 (m), 140.7, 140.0, 139.7-139.1 (m), 136.2-135.8 (m), 131.5, 129.7, 123.4, 122.7, 122.5(q,  $J = 279.00$  Hz), 119.4, 109.2-108.7 (m), 108.4, 81.9 (q,  $J = 33.00$  Hz), 74.0, 59.5, 44.6, 31.8 ppm.  **$^{19}\text{F NMR}$  (282 MHz,  $\text{CDCl}_3$ )**  $\delta$  -80.91 (d,  $J = 5.6$  Hz), -142.29-142.40 (m), -154.53 (t,  $J = 22.56$  Hz), -162.09-162.27 (m) ppm. **HRMS** ( $m/z$ )  $[\text{M} + \text{H}]^+$  Calcd for  $\text{C}_{21}\text{H}_{15}\text{F}_8\text{N}_2\text{O}_2^+$  479.1000, found 479.1013. **HPLC** (Chiralpak IB-H, *n*-hexane/*i*-propanol = 99/1, flow rate = 1.0 mL/min,  $\lambda = 254$  nm)  $t_R = 31.13$  min (minor), 39.17 min (major).

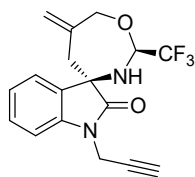

**3k:** Purified by silica gel chromatography using PE/EA 5:1, white solid, 55% yield, 18.5 mg, 89 % ee, dr > 20:1; MP: 179.3-180.6 °C.  $[\alpha]_D = +53$  ( $c = 0.1$ ,  $\text{CH}_2\text{Cl}_2$ , 32.8 °C).  **$^1\text{H NMR}$  (300 MHz,  $\text{CDCl}_3$ ):**  $\delta$  7.40-7.34 (m, 2H), 7.14-7.09 (m, 2H), 5.37 (dd,  $J = 10.5, 4.8$  Hz, 1H), 5.25(s, 1H), 5.00(s, 1H), 4.67-4.56 (m, 2H), 4.38-4.31 (m, 2H), 2.88 (d,  $J = 14.1$  Hz, 1H), 2.72 (d,  $J = 14.1$  Hz, 1H), 2.44 (d,  $J = 11.1$  Hz, 1H), 2.27 (s, 1H) ppm.  **$^{13}\text{C NMR}$  (75 MHz,  $\text{CDCl}_3$ ):**  $\delta$  176.1, 140.9, 140.3, 131.4, 129.6, 123.3, 122.6, 122.5(q,  $J = 279.75$  Hz), 119.3, 109.7, 82.2 (q,  $J = 33.00$  Hz), 76.7, 74.0, 72.7, 59.7, 44.4, 29.3 ppm.  **$^{19}\text{F NMR}$  (282 MHz,  $\text{CDCl}_3$ )**  $\delta$  -80.88 (d,  $J = 2.8$  Hz) ppm. **HRMS** ( $m/z$ )  $[\text{M} + \text{H}]^+$  Calcd for  $\text{C}_{17}\text{H}_{16}\text{F}_3\text{N}_2\text{O}_2^+$  337.1164, found 337.1161. **HPLC** (Chiralpak IG-H, *n*-hexane/*i*-propanol = 95/5, flow rate = 1.0 mL/min,  $\lambda = 254$  nm)  $t_R = 9.92$  min (minor), 11.57 min (major).

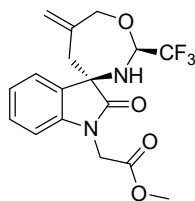

**3l:** Purified by silica gel chromatography using PE/EA 5:1, white solid; 70% yield, 25.9 mg, 94% ee, dr: 95 :5; MP: 101.2-102.5 °C.  $[\alpha]_D = +37$  ( $c = 0.1$ ,  $\text{CH}_2\text{Cl}_2$ , 30.7 °C).  **$^1\text{H NMR}$  (300 MHz,  $\text{CDCl}_3$ ):**  $\delta$  7.37-7.29 (m, 2H), 7.10 (t,  $J = 7.5$  Hz, 1H), 6.75 (d,  $J = 8.1$  Hz, 1H), 5.38 (td,  $J = 9.9, 4.8$  Hz, 1H), 5.24 (s, 1H), 5.00 (s, 1H), 4.69-4.57 (m, 2H), 4.37 (d,  $J = 13.2$  Hz, 1H), 4.25 (d,  $J = 17.7$  Hz, 1H), 3.77 (s, 3H), 2.90 (d,  $J = 14.1$  Hz, 1H), 2.77 (d,  $J = 14.1$  Hz, 1H), 2.48 (d,  $J = 11.4$  Hz, 1H) ppm.  **$^{13}\text{C NMR}$  (75 MHz,  $\text{CDCl}_3$ ):**  $\delta$  177.0, 167.9, 141.3, 140.1, 131.3, 129.6, 123.3, 122.7, 122.5 (q,  $J = 279.75$  Hz), 119.4, 108.6, 82.1 (q,  $J = 32.25$  Hz), 74.0, 59.7, 52.7, 44.7, 41.0 ppm.  **$^{19}\text{F NMR}$  (282 MHz,  $\text{CDCl}_3$ )**  $\delta$  -80.78 (d,  $J = 5.6$  Hz) ppm. **HRMS** ( $m/z$ )  $[\text{M}+\text{H}]^+$  Calcd for  $\text{C}_{17}\text{H}_{18}\text{F}_3\text{N}_2\text{O}_4^+$  371.1219, found 371.1221. **HPLC** (Chiralpak IB-H, *n*-hexane/*i*-propanol = 95/5, flow rate = 1.0 mL/min,  $\lambda = 254$  nm) tR = 16.53 min (major), 30.50 min (minor).

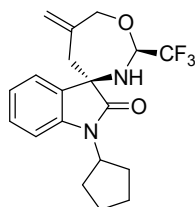

**3m:** Purified by silica gel chromatography using PE/EA 6:1, yellow oil, 62% yield, 22.7 mg, 94 % ee, dr > 20 :1;  $[\alpha]_D = +18$  ( $c = 0.1$ ,  $\text{CH}_2\text{Cl}_2$ , 33.1 °C).  **$^1\text{H NMR}$  (300 MHz,  $\text{CDCl}_3$ ):**  $\delta$  7.35-7.28 (m, 2H), 7.08-7.02 (m, 1H), 6.95 (d,  $J = 8.1$  Hz, 1H), 5.40 (d,  $J = 3.9$  Hz, 1H), 5.24 (s, 1H), 4.98 (s, 1H), 4.77-4.65 (m, 1H), 4.57 (d,  $J = 13.2$  Hz, 1H), 4.35 (d,  $J = 13.2$  Hz, 1H), 2.87 (d,  $J = 14.1$  Hz, 1H), 2.67 (d,  $J = 13.8$  Hz, 1H), 2.40 (s, 1H), 2.12-2.03 (m, 2H), 1.99-1.89 (m, 4H), 1.77-1.70 (m, 2H) ppm.  **$^{13}\text{C NMR}$  (75 MHz,  $\text{CDCl}_3$ ):**  $\delta$  177.2, 141.4, 140.7, 132.0, 129.2, 122.7, 122.5 (q,  $J = 279.00$  Hz), 122.3, 118.9, 110.1, 82.3 (q,  $J = 33.00$  Hz), 74.0, 59.3, 52.3, 44.6, 27.8, 27.5, 25.2 ppm.  **$^{19}\text{F NMR}$  (282 MHz,  $\text{CDCl}_3$ )**  $\delta$  -80.77 (d,  $J = 2.8$  Hz) ppm. **HRMS** ( $m/z$ )  $[\text{M}+\text{H}]^+$  Calcd for  $\text{C}_{19}\text{H}_{22}\text{F}_3\text{N}_2\text{O}_2^+$  367.1633, found 367.1624. **HPLC** (Chiralpak IG-H,

*n*-hexane/*i*-propanol = 99/1, flow rate = 1.0 mL/min,  $\lambda = 254$  nm) tR = 15.12 min (major), 19.43 min (minor).

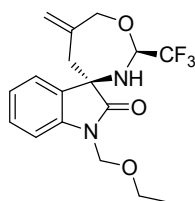

**3n:** Purified by silica gel chromatography using PE/EA 5:1, yellow oil, 62% yield, 22.1 mg, 90 % ee, dr > 20 :1;  $[\alpha]_D = +23$  ( $c = 0.1$ , CH<sub>2</sub>Cl<sub>2</sub>, 31.5 °C). **<sup>1</sup>H NMR (300 MHz, CDCl<sub>3</sub>):**  $\delta$  7.38-7.33 (m, 2H), 7.14-7.08 (m, 2H), 5.37 (d,  $J = 3.3$  Hz, 1H), 5.26 (s, 1H), 5.17 (dd,  $J = 19.5, 11.1$  Hz, 2H), 5.01 (s, 1H), 4.59 (d,  $J = 13.2$  Hz, 1H), 4.37 (d,  $J = 13.2$  Hz, 1H), 3.55 (dd,  $J = 11.4, 7.2$  Hz, 2H), 2.89 (d,  $J = 14.1$  Hz, 1H), 2.76 (d,  $J = 14.1$  Hz, 1H), 2.45 (s, 1H), 1.18 (t,  $J = 6.9$  Hz, 3H) ppm. **<sup>13</sup>C NMR (75 MHz, CDCl<sub>3</sub>):**  $\delta$  177.5, 141.1, 140.4, 131.2, 129.7, 123.4, 122.5, 122.4(q,  $J = 279.75$  Hz), 119.3, 110.2, 82.1 (q,  $J = 33.00$  Hz), 74.1, 69.8, 64.3, 59.8, 44.5, 14.9 ppm. **<sup>19</sup>F NMR (282 MHz, CDCl<sub>3</sub>)**  $\delta$  -80.87 (d,  $J = 5.6$  Hz) ppm. **HRMS (m/z) [M + H]<sup>+</sup>** Calcd for C<sub>17</sub>H<sub>20</sub>F<sub>3</sub>N<sub>2</sub>O<sub>3</sub><sup>+</sup> 357.1426, found 357.1435. **HPLC** (Chiralpak AD-H, *n*-hexane/*i*-propanol = 97/3, flow rate = 1.0 mL/min,  $\lambda = 254$  nm) tR = 7.63 min (major), 9.15 min (minor).

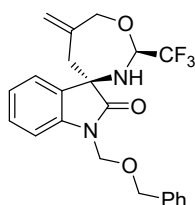

**3o:** Purified by silica gel chromatography using PE/EA 5:1, yellow oil, 69% yield, 28.8 mg, 84% ee, dr > 20 :1;  $[\alpha]_D = +28$  ( $c = 0.1$ , CH<sub>2</sub>Cl<sub>2</sub>, 32.3 °C). **<sup>1</sup>H NMR (300 MHz, CDCl<sub>3</sub>):**  $\delta$  7.38-7.33 (m, 2H), 7.31-7.28 (m, 5H), 7.14-7.09 (m, 2H), 5.37 (td,  $J = 9.9, 4.8$  Hz, 1H), 5.29-5.18 (m, 3H), 4.99 (s, 1H), 4.60-4.50 (m, 3H), 4.35 (d,  $J = 13.5$  Hz, 1H), 2.85 (d,  $J = 14.1$  Hz, 1H), 2.67 (d,  $J = 13.8$  Hz, 1H), 2.44 (d,  $J = 11.4$  Hz, 1H) ppm. **<sup>13</sup>C NMR (75 MHz, CDCl<sub>3</sub>):**  $\delta$  177.6, 141.0, 140.4, 137.2, 131.2, 129.7, 128.4, 127.9, 123.4, 122.6, 122.4(q,  $J = 270.75$  Hz), 119.3, 110.2, 82.1 (q,  $J = 32.25$  Hz), 74.1, 70.6, 69.5, 59.8, 44.4 ppm. **<sup>19</sup>F NMR (282 MHz, CDCl<sub>3</sub>)**  $\delta$  -80.97 (d,  $J = 5.6$  Hz) ppm. **HRMS (m/z) [M + H]<sup>+</sup>** Calcd for C<sub>22</sub>H<sub>22</sub>F<sub>3</sub>N<sub>2</sub>O<sub>3</sub><sup>+</sup> 419.1583, found



419.1591. **HPLC** (Chiralpak IG-H, *n*-hexane/*i*-propanol = 99/1, flow rate = 1.0 mL/min,  $\lambda = 254$  nm) tR = 24.13 min (minor), 27.02 min (major).

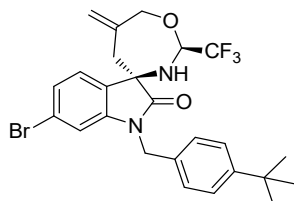

**3p**: Purified by silica gel chromatography using PE/EA 5:1, yellow oil, 47% yield, 24.5 mg, 86% ee, dr: 97 :3;  $[\alpha]_D = +9$  ( $c = 0.1$ ,  $\text{CH}_2\text{Cl}_2$ ,  $31.1$  °C).  **$^1\text{H NMR}$  (300 MHz,  $\text{CDCl}_3$ )**:  $\delta$  7.36 (d,  $J = 8.1$  Hz, 2H), 7.21-7.15 (m, 4H), 6.92 (d,  $J = 0.6$  Hz, 1H), 5.41 (dd,  $J = 9.0, 4.2$  Hz, 1H), 5.26 (s, 1H), 5.00 (s, 1H), 4.89 (d,  $J = 15.6$  Hz, 1H), 4.74 (d,  $J = 15.9$  Hz, 1H), 4.58 (d,  $J = 13.2$  Hz, 1H), 4.36 (d,  $J = 13.2$  Hz, 1H), 2.92 (d,  $J = 13.8$  Hz, 1H), 2.72 (d,  $J = 14.1$  Hz, 1H), 2.44 (d,  $J = 10.5$  Hz, 1H), 1.29 (s, 9H) ppm.  **$^{13}\text{C NMR}$  (75 MHz,  $\text{CDCl}_3$ )**:  $\delta$  177.0, 150.9, 143.4, 140.3, 132.0, 130.5, 126.8, 125.9, 125.7, 123.9, 123.2, 122.5 (q,  $J = 279.75$  Hz), 119.4, 113.0, 82.2 (q,  $J = 33.00$  Hz), 74.0, 59.4, 44.4, 43.3, 34.6, 31.3 ppm.  **$^{19}\text{F NMR}$  (282 MHz,  $\text{CDCl}_3$ )**  $\delta$  -80.80 (d,  $J = 5.6$  Hz) ppm. **HRMS** ( $m/z$ )  $[\text{M} + \text{H}]^+$  Calcd for  $\text{C}_{25}\text{H}_{27}\text{BrF}_3\text{N}_2\text{O}_2^+$  523.1208, found 523.1202. **HPLC** (Chiralpak AD-H, *n*-hexane/*i*-propanol = 95/5, flow rate = 1.0 mL/min,  $\lambda = 254$  nm) tR = 7.70 min (major), 10.20 min (minor).

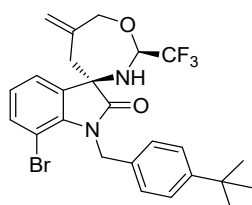

**3q**: Purified by silica gel chromatography using PE/EA 5:1, white solid, 63% yield, 32.9 mg, 97% ee, dr > 20 :1; MP: 102.6-103.8 °C.  $[\alpha]_D = +34$  ( $c = 0.1$ ,  $\text{CH}_2\text{Cl}_2$ , 30.8 °C).  **$^1\text{H NMR}$  (300 MHz,  $\text{CDCl}_3$ )**:  $\delta$  7.38 (d,  $J = 8.4$  Hz, 1H), 7.33-7.28 (m, 3H), 7.16 (d,  $J = 8.4$  Hz, 2H), 6.91 (t,  $J = 7.5$  Hz, 1H), 5.45-5.29 (m, 3H), 5.25 (s, 1H), 4.98 (s, 1H), 4.59 (d,  $J = 13.5$  Hz, 1H), 4.38 (d,  $J = 13.5$  Hz, 1H), 2.89 (d,  $J = 13.8$  Hz, 1H), 2.78 (d,  $J = 13.8$  Hz, 1H), 2.45 (d,  $J = 10.8$  Hz, 1H), 1.28 (s, 9H) ppm.  **$^{13}\text{C NMR}$  (75 MHz,  $\text{CDCl}_3$ )**:  $\delta$  177.8, 150.1, 140.2, 139.6, 135.4, 134.9, 134.0, 126.1, 125.5, 124.2, 122.5 (q,  $J = 279.75$  Hz), 121.5, 119.5, 103.1, 82.0 (q,  $J = 32.25$  Hz), 74.0, 58.9, 44.9, 43.9, 34.5, 31.3 ppm.  **$^{19}\text{F NMR}$  (282 MHz,  $\text{CDCl}_3$ )**  $\delta$  -80.83 (d,  $J = 5.6$  Hz) ppm.

**HRMS** (m/z) [M + H]<sup>+</sup> Calcd for C<sub>25</sub>H<sub>27</sub>BrF<sub>3</sub>N<sub>2</sub>O<sub>2</sub><sup>+</sup> 523.1208, found 523.1202.

**HPLC** (Chiralpak AD-H, *n*-hexane/*i*-propanol = 97/3, flow rate = 1.0 mL/min, λ = 254 nm) tR = 9.35 min (major), 12.03 min (minor).

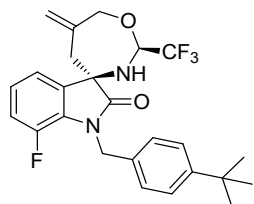

**3r**: Purified by silica gel chromatography using PE/EA 5:1, yellow oil, 64% yield, 29.5 mg, 93% ee, dr: 94 :6; [α]<sub>D</sub> = + 23 (*c* = 0.1, CH<sub>2</sub>Cl<sub>2</sub>, 31.5 °C). **<sup>1</sup>H NMR (300 MHz, CDCl<sub>3</sub>)**: δ 7.34-7.24 (m, 4H), 7.13-7.10 (m, 1H), 7.03-6.97 (m, 2H), 5.44 (dd, *J* = 9.4, 4.5 Hz, 1H), 5.26 (s, 1H), 5.05-4.94 (m, 3H), 4.59 (d, *J* = 13.3 Hz, 1H), 4.38 (d, *J* = 13.3 Hz, 1H), 2.89 (d, *J* = 14.0 Hz, 1H), 2.75 (d, *J* = 14.0 Hz, 1H), 2.45 (d, *J* = 10.9 Hz, 1H), 1.28 (s, 9H) ppm. **<sup>13</sup>C NMR (75 MHz, CDCl<sub>3</sub>)**: δ 176.8, 150.6, 147.6 (d, *J* = 244.50 Hz), 140.2, 134.4 (d, *J* = 3.00 Hz), 133.8, 128.7 (d, *J* = 9.00 Hz), 127.2 (d, *J* = 0.75 Hz), 125.6, 123.7 (d, *J* = 6.00 Hz), 122.5 (q, *J* = 278.25 Hz), 119.5, 118.3 (d, *J* = 3.75 Hz), 117.7 (d, *J* = 20.25 Hz), 82.0 (q, *J* = 32.25 Hz), 74.1, 59.7 (d, *J* = 1.50 Hz), 44.8 (d, *J* = 5.25 Hz), 44.6, 34.5, 31.3 ppm. **<sup>19</sup>F NMR (282 MHz, CDCl<sub>3</sub>)** δ -80.89 (d, *J* = 5.6 Hz), -133.72 (d, *J* = 8.4 Hz) ppm. **HRMS** (m/z) [M + H]<sup>+</sup> Calcd for C<sub>25</sub>H<sub>27</sub>F<sub>4</sub>N<sub>2</sub>O<sub>2</sub><sup>+</sup> 463.2009, found 463.2013. **HPLC** (Chiralpak AD-H, *n*-hexane/*i*-propanol = 80/20, flow rate = 1.0 mL/min, λ = 254 nm) tR = 5.18 min (major), 5.90 min (minor).

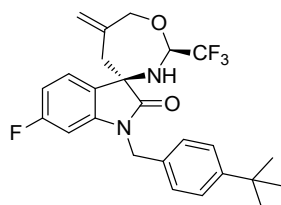

**3s**: Purified by silica gel chromatography using PE/EA 5:1, yellow oil, 61% yield, 28.2 mg, 86% ee, dr: 95 :5; [α]<sub>D</sub> = + 20 (*c* = 0.1, CH<sub>2</sub>Cl<sub>2</sub>, 31.2 °C). **<sup>1</sup>H NMR (300 MHz, CDCl<sub>3</sub>)**: δ 7.35 (d, *J* = 8.4 Hz, 2H), 7.30-7.27 (m, 1H), 7.19 (d, *J* = 8.1 Hz, 2H), 6.70 (td, *J* = 9.6, 2.4 Hz, 1H), 6.50 (dd, *J* = 9.0, 2.4 Hz, 1H), 5.42 (s, 1H), 5.27 (s, 1H), 5.01 (s, 1H), 4.90 (d, *J* = 15.6 Hz, 1H), 4.75 (d, *J* = 15.6 Hz, 1H), 4.59 (d, *J* = 13.5 Hz,

1H), 4.37 (d,  $J = 13.5$  Hz, 1H), 2.94 (d,  $J = 14.1$  Hz, 1H), 2.74 (d,  $J = 13.8$  Hz, 1H), 2.45 (s, 1H), 1.29 (s, 9H) ppm.  $^{13}\text{C}$  NMR (75 MHz,  $\text{CDCl}_3$ ):  $\delta$  177.4, 163.6 (d,  $J = 245.25$  Hz), 150.9, 143.7 (d,  $J = 12.00$  Hz), 140.4, 132.0, 127.1 (d,  $J = 3.00$  Hz), 126.9, 125.9, 123.7 (d,  $J = 9.75$  Hz), 122.5 (q,  $J = 279.00$  Hz), 119.3, 108.9 (d,  $J = 22.50$  Hz), 98.5 (d,  $J = 27.75$  Hz), 82.1 (q,  $J = 33.00$  Hz), 74.0, 59.3, 44.5, 43.4, 34.5, 31.3 ppm.  $^{19}\text{F}$  NMR (282 MHz,  $\text{CDCl}_3$ )  $\delta$  -80.82 (d,  $J = 5.6$  Hz); -110.98 ppm. HRMS (m/z)  $[\text{M} + \text{H}]^+$  Calcd for  $\text{C}_{25}\text{H}_{27}\text{F}_4\text{N}_2\text{O}_2^+$  463.2009, found 463.2012. HPLC (Chiralpak AD-H, *n*-hexane/*i*-propanol = 95/5, flow rate = 1.0 mL/min,  $\lambda = 254$  nm) tR = 8.05 min (major), 10.32 min (minor).

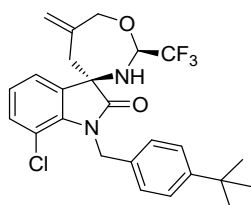

**3t:** Purified by silica gel chromatography using PE/EA 5:1, white solid, 54% yield, 25.8 mg, 94% ee, dr: 95 :5; **MP:** 111.3-112.5°C.  $[\alpha]_{\text{D}} = +47$  ( $c = 0.1$ ,  $\text{CH}_2\text{Cl}_2$ , 30.4°C).  $^1\text{H}$  NMR (300 MHz,  $\text{CDCl}_3$ ):  $\delta$  7.32 (d,  $J = 8.4$  Hz, 2H), 7.26-7.24 (m, 1H), 7.09 (d,  $J = 8.4$  Hz, 2H), 7.21-7.16 (m, 3H), 6.98 (t,  $J = 7.5$  Hz, 1H), 5.43 (td,  $J = 9.6$ , 4.5 Hz, 1H), 5.37-5.24 (m, 3H), 4.99 (s, 1H), 4.59 (d,  $J = 13.2$  Hz, 1H), 4.39 (d,  $J = 13.5$  Hz, 1H), 2.90 (d,  $J = 13.8$  Hz, 1H), 2.75 (d,  $J = 13.8$  Hz, 1H), 2.45 (d,  $J = 11.4$  Hz, 1H), 1.28 (s, 9H) ppm.  $^{13}\text{C}$  NMR (75 MHz,  $\text{CDCl}_3$ ):  $\delta$  177.6, 150.2, 140.2, 138.1, 134.5, 134.2, 132.0, 126.3, 125.5, 123.8, 120.9, 122.6 (q,  $J = 278.25$  Hz), 119.5, 116.1, 82.0 (q,  $J = 33.00$  Hz), 74.1, 59.0, 44.8, 44.2, 34.5, 31.3 ppm.  $^{19}\text{F}$  NMR (282 MHz,  $\text{CDCl}_3$ )  $\delta$  -80.83 (d,  $J = 5.6$  Hz,) ppm. HRMS (m/z)  $[\text{M} + \text{H}]^+$  Calcd for  $\text{C}_{25}\text{H}_{27}\text{ClF}_3\text{N}_2\text{O}_2^+$  479.1713, found 479.1718. HPLC (Chiralpak AD-H, *n*-hexane/*i*-propanol = 99/1, flow rate = 1.0 mL/min,  $\lambda = 254$  nm) tR = 17.76 min (major), 24.71 min (minor).

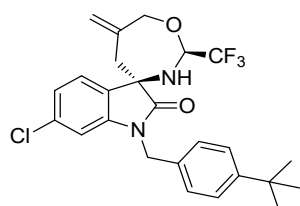

**3u:** Purified by silica gel chromatography using PE/EA 5:1, yellow oil, 57% yield, 27.2 mg, 86% ee, dr: 85:15;  $[\alpha]_D = +20$  ( $c = 0.1$ ,  $\text{CH}_2\text{Cl}_2$ ,  $33.1^\circ\text{C}$ ).  **$^1\text{H NMR}$  (300 MHz,  $\text{CDCl}_3$ ):**  $\delta$  7.36 (d,  $J = 8.1$  Hz, 2H), 7.23 (t,  $J = 9.9$  Hz, 3H), 7.01 (d,  $J = 7.2$  Hz, 1H), 6.77 (s, 1H), 5.41 (s, 1H), 5.27 (s, 1H), 5.01 (s, 1H), 4.90 (d,  $J = 15.6$  Hz, 1H), 4.75 (d,  $J = 15.6$  Hz, 1H), 4.59 (d,  $J = 13.2$  Hz, 1H), 4.37 (d,  $J = 13.2$  Hz, 1H), 2.93 (d,  $J = 14.1$  Hz, 1H), 2.73 (d,  $J = 14.1$  Hz, 1H), 2.43 (s, 1H), 1.30 (s, 9H) ppm.  **$^{13}\text{C NMR}$  (75 MHz,  $\text{CDCl}_3$ ):**  $\delta$  177.1, 150.9, 143.3, 140.3, 135.4, 131.9, 129.9, 126.8, 125.9, 123.5, 122.7, 122.4 (q,  $J = 279.00$  Hz), 119.4, 110.3, 82.2 (q,  $J = 33.00$  Hz), 74.0, 59.4, 44.4, 43.3, 34.6, 31.3 ppm.  **$^{19}\text{F NMR}$  (282 MHz,  $\text{CDCl}_3$ )**  $\delta$  -80.90 (d,  $J = 5.6$  Hz) ppm. **HRMS** ( $m/z$ )  $[\text{M} + \text{H}]^+$  Calcd for  $\text{C}_{25}\text{H}_{27}\text{ClF}_3\text{N}_2\text{O}_2^+$  479.1713, found 479.1719. **HPLC** (Chiralpak AD-H,  $n$ -hexane/ $i$ -propanol = 90/10, flow rate = 1.0 mL/min,  $\lambda = 254$  nm)  $t_R = 6.03$  min (major), 7.64 min (minor).

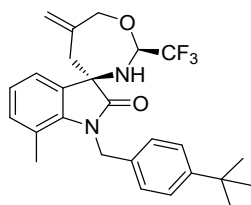

**3v:** Purified by silica gel chromatography using PE/EA 5:1, white solid, 68% yield, 31.1 mg, 92% ee, dr: 94 : 6; **MP:** 104.4-105.8  $^\circ\text{C}$ .  $[\alpha]_D = +25$  ( $c = 0.1$ ,  $\text{CH}_2\text{Cl}_2$ ,  $28.9^\circ\text{C}$ ).  **$^1\text{H NMR}$  (300 MHz,  $\text{CDCl}_3$ ):**  $\delta$  7.32 (d,  $J = 8.4$  Hz, 2H), 7.21 (dd,  $J = 6.3, 1.8$  Hz, 1H), 7.09 (d,  $J = 8.4$  Hz, 2H), 7.00-6.93 (m, 2H), 5.47 (d,  $J = 4.2$  Hz, 1H), 5.25 (s, 1H), 5.13 (s, 2H), 5.03 (s, 1H), 4.60 (d,  $J = 13.5$  Hz, 1H), 4.40 (d,  $J = 13.5$  Hz, 1H), 2.93 (d,  $J = 14.1$  Hz, 1H), 2.82 (d,  $J = 14.1$  Hz, 1H), 2.47 (s, 1H), 2.31 (s, 3H), 1.28 (s, 9H) ppm.  **$^{13}\text{C NMR}$  (75 MHz,  $\text{CDCl}_3$ ):**  $\delta$  178.1, 150.2, 140.7, 139.9, 134.3, 133.3, 132.5, 125.8, 125.4, 123.0, 122.5 (q,  $J = 288.25$  Hz), 120.7, 120.2, 119.2, 82.0 (q,  $J = 33.00$  Hz), 74.1, 58.7, 45.0, 44.4, 34.5, 31.3, 19.0 ppm.  **$^{19}\text{F NMR}$  (282 MHz,  $\text{CDCl}_3$ )**  $\delta$  -81.10 (d,  $J = 5.6$  Hz,) ppm. **HRMS** ( $m/z$ )  $[\text{M} + \text{H}]^+$  Calcd for  $\text{C}_{26}\text{H}_{30}\text{F}_3\text{N}_2\text{O}_2^+$  459.2259, found 459.2266. **HPLC** (Chiralpak AD-H,  $n$ -hexane/ $i$ -propanol = 95/5, flow rate = 1.0 mL/min,  $\lambda = 254$  nm)  $t_R = 6.69$  min (major), 11.96 min (minor).

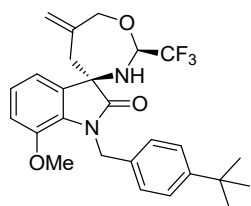

**3w:** Purified by silica gel chromatography using PE/EA 5:1, yellow oil, 55% yield, 26.1 mg, 90% ee, dr: 90 : 10;  $[\alpha]_D = +14$  ( $c = 0.1$ ,  $\text{CH}_2\text{Cl}_2$ ,  $33.1^\circ\text{C}$ ).  **$^1\text{H NMR}$  (300 MHz,  $\text{CDCl}_3$ ):**  $\delta$  7.30 (d,  $J = 8.1$  Hz, 2H), 7.24-7.21 (m, 2H), 7.03-6.93 (m, 2H), 6.85 (d,  $J = 8.1$  Hz, 1H), 5.47 (td,  $J = 10.2, 4.8$  Hz, 1H), 5.24 (s, 1H), 5.18-5.07 (m, 2H), 4.97 (s, 1H), 4.58 (d,  $J = 13.2$  Hz, 1H), 4.38 (d,  $J = 13.2$  Hz, 1H), 3.72 (s, 3H), 2.86 (d,  $J = 14.1$  Hz, 1H), 2.75 (d,  $J = 13.8$  Hz, 1H), 2.43 (d,  $J = 11.1$  Hz, 1H), 1.28 (s, 9H) ppm.  **$^{13}\text{C NMR}$  (75 MHz,  $\text{CDCl}_3$ ):**  $\delta$  177.4, 149.9, 145.4, 140.6, 135.2, 133.3, 130.0, 127.0, 125.3, 123.7, 122.6 (q,  $J = 279.75$  Hz), 119.1, 114.8, 113.6, 82.0 (q,  $J = 33.00$  Hz), 74.1, 59.5, 55.9, 45.1, 44.8, 34.5, 31.3 ppm.  **$^{19}\text{F NMR}$  (282 MHz,  $\text{CDCl}_3$ )**  $\delta$  -81.07 (d,  $J = 5.6$  Hz) ppm. **HRMS** ( $m/z$ )  $[\text{M} + \text{H}]^+$  Calcd for  $\text{C}_{26}\text{H}_{30}\text{F}_3\text{N}_2\text{O}_3^+$  475.2209, found 475.2216. **HPLC** (Chiralpak AD-H,  $n$ -hexane/*i*-propanol = 95/5, flow rate = 1.0 mL/min,  $\lambda = 254$  nm)  $t_R = 8.96$  min (major), 18.84 min (minor).

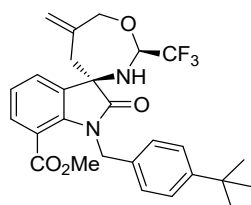

**3x:** Purified by silica gel chromatography using PE/EA 5:1, yellow oil, 49% yield, 24.6 mg, 92% ee, dr > 20 : 1;  $[\alpha]_D = +27$  ( $c = 0.1$ ,  $\text{CH}_2\text{Cl}_2$ ,  $30.1^\circ\text{C}$ ).  **$^1\text{H NMR}$  (300 MHz,  $\text{CDCl}_3$ ):**  $\delta$  7.48-7.39 (m, 2H), 7.25 (d,  $J = 7.2$  Hz, 2H), 7.05 (t,  $J = 8.1$  Hz, 1H), 6.96 (d,  $J = 8.4$  Hz, 2H), 5.48 (td,  $J = 9.9, 4.8$  Hz, 1H), 5.37-5.28 (m, 2H), 5.06 (d,  $J = 18.0$  Hz, 2H), 4.61 (d,  $J = 13.5$  Hz, 1H), 4.41 (d,  $J = 13.2$  Hz, 1H), 3.61 (s, 3H), 2.94 (d,  $J = 14.1$  Hz, 1H), 2.83 (d,  $J = 14.1$  Hz, 1H), 2.48 (d,  $J = 11.4$  Hz, 1H), 1.25 (s, 9H) ppm.  **$^{13}\text{C NMR}$  (75 MHz,  $\text{CDCl}_3$ ):**  $\delta$  178.0, 166.7, 150.2, 140.2, 139.9, 133.6, 132.2, 130.2, 126.5, 125.4, 124.9, 122.5 (q,  $J = 279.00$  Hz), 122.2, 119.5, 117.6, 81.9 (q,  $J = 33.00$  Hz), 74.1, 58.2, 52.4, 44.7, 44.2, 34.4, 31.3 ppm.  **$^{19}\text{F NMR}$  (282 MHz,  $\text{CDCl}_3$ )**  $\delta$  -80.83 (d,  $J = 5.6$  Hz) ppm. **HRMS** ( $m/z$ )  $[\text{M} + \text{H}]^+$  Calcd for  $\text{C}_{27}\text{H}_{30}\text{F}_3\text{N}_2\text{O}_4^+$

503.2158, found 503.2164. **HPLC** (Chiralpak IB-H, *n*-hexane/*i*-propanol = 99/1, flow rate = 1.0 mL/min,  $\lambda$  = 254 nm) tR = 13.00 min (minor), 16.04 min (major).

1. (a) Niu, B.; Wu, X.; Wei, Y.; Shi, M. Palladium-Catalyzed Diastereoselective Formal [5+3] Cycloaddition for the Construction of Spirooxindoles Fused with an EightMembered Ring. *Org. Lett.* **2019**, *21*, 4859-4863. (b) Li, X.; Shen, Z.; Yan, W.; Wang, K.; Wang, R. Synthesis of Chiral  $\alpha$ -Trifluoromethylamines with 2,2,2-Trifluoroethylamine as a "Building Block". *Org. Lett.* **2016**, *18*, 956-959.
2. Mao, B.; Liu, H.; Yan, Z.; Xu, Y.; Xu, J.; Wang, W.; Wu, Y.; Guo, H. Palladium-Catalyzed Asymmetric [4+2] Cycloaddition of 2-Methylidenetrimethylene Carbonate with Alkenes: Access to Chiral Tetrahydropyran-Fused Spirocyclic Scaffolds. *Angew. Chem. Int. Ed.* **2020**, *59*, 11316-11320.

## 5. Copies of $^1\text{H}$ NMR, $^{13}\text{C}$ NMR, $^{19}\text{F}$ NMR Spectra

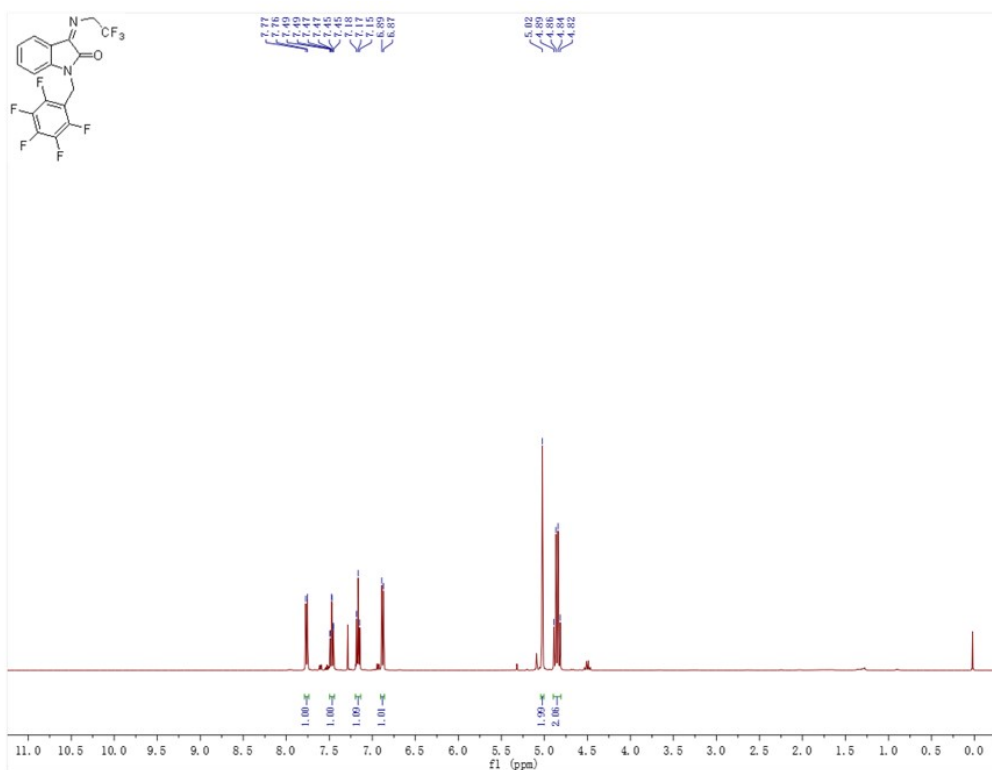

$^1\text{H}$  NMR ( $\text{CDCl}_3$ , 400 MHz) NMR of **1j**

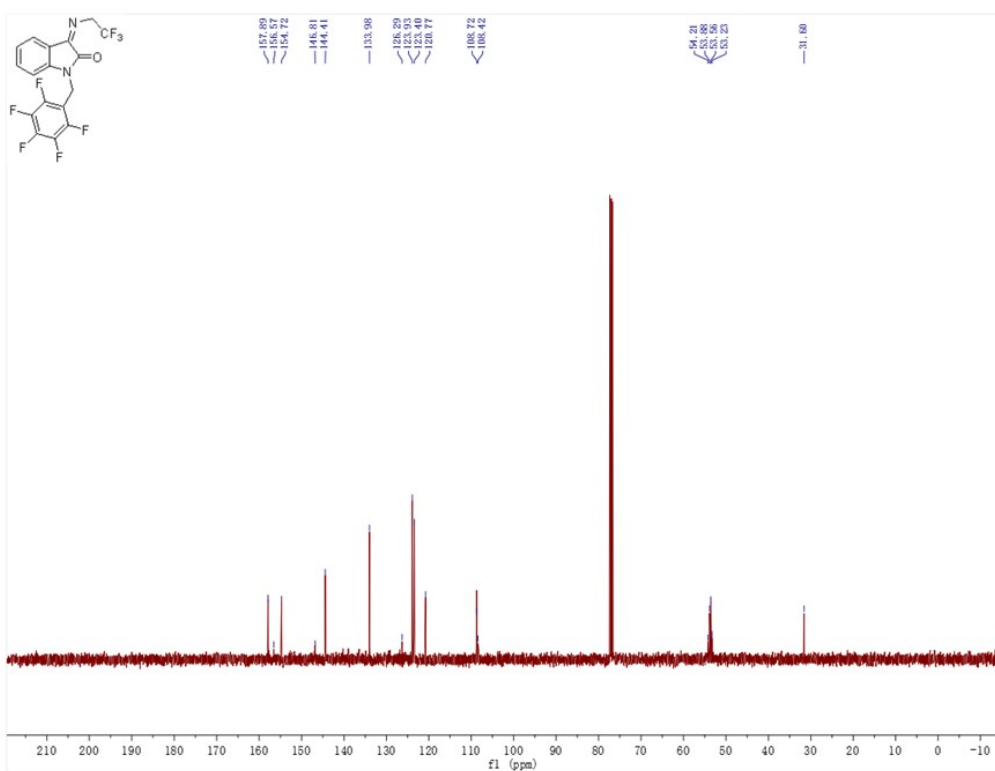

$^{13}\text{C}$  NMR ( $\text{CDCl}_3$ , 101 MHz) NMR of **1j**

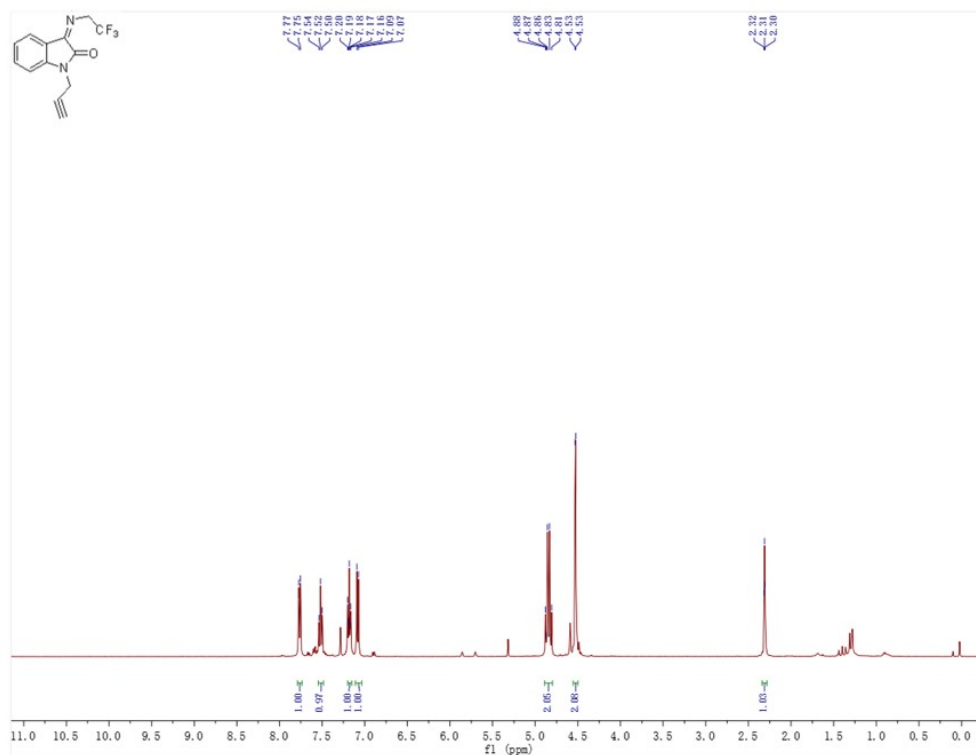

<sup>1</sup>H NMR (CDCl<sub>3</sub>, 400 MHz) NMR of **1k**

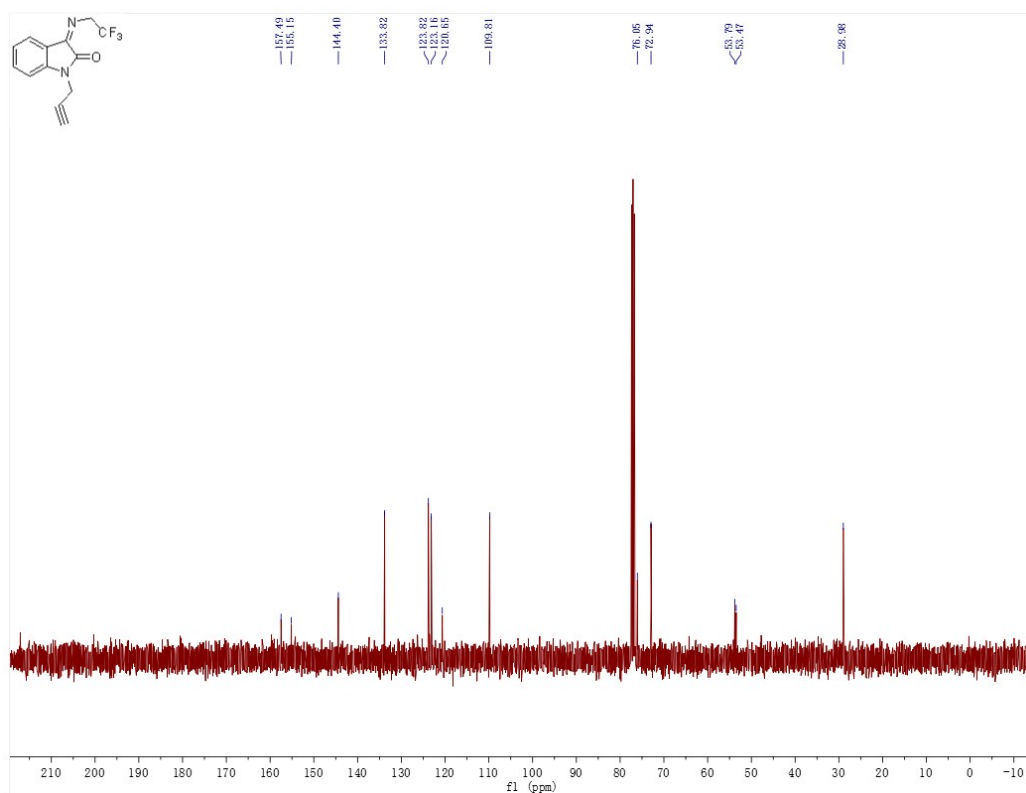

<sup>13</sup>C NMR (CDCl<sub>3</sub>, 101 MHz) NMR of **1k**



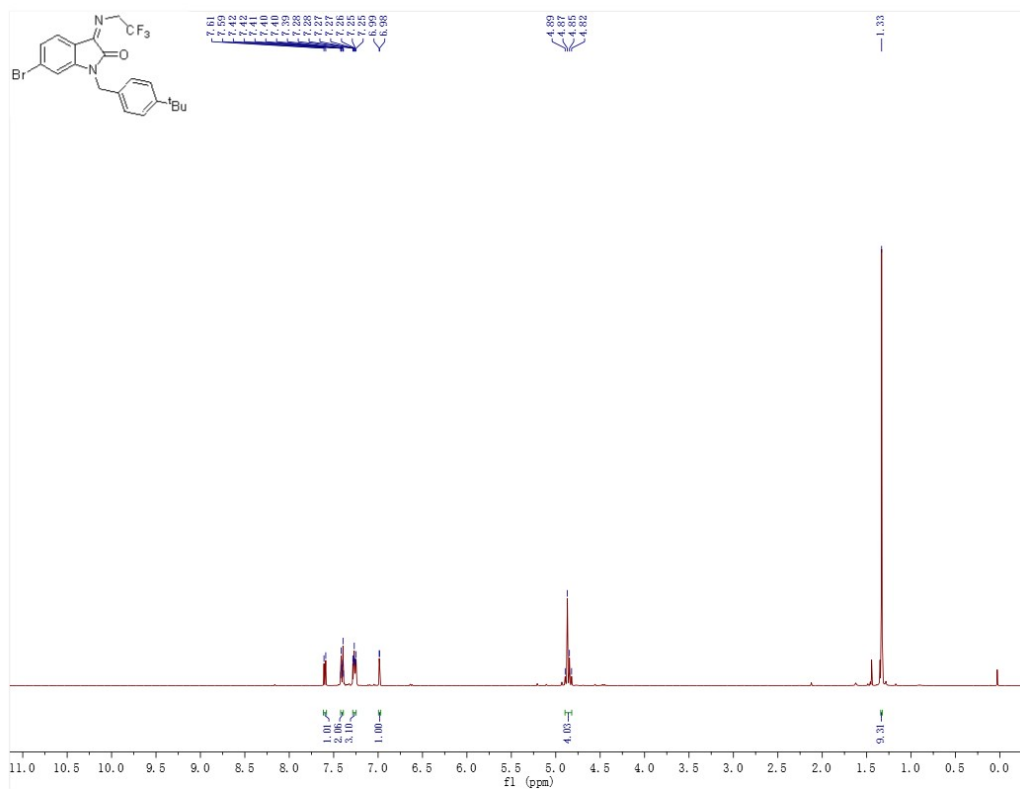

<sup>1</sup>H NMR (CDCl<sub>3</sub>, 400 MHz) NMR of **1p**

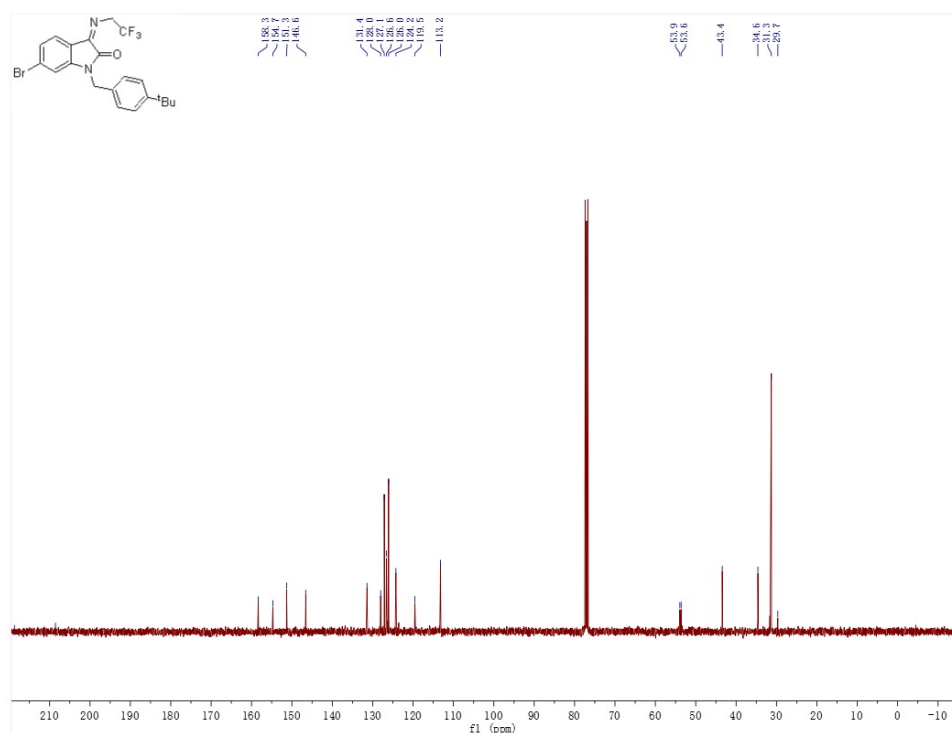

<sup>13</sup>C NMR (CDCl<sub>3</sub>, 101 MHz) NMR of **1p**

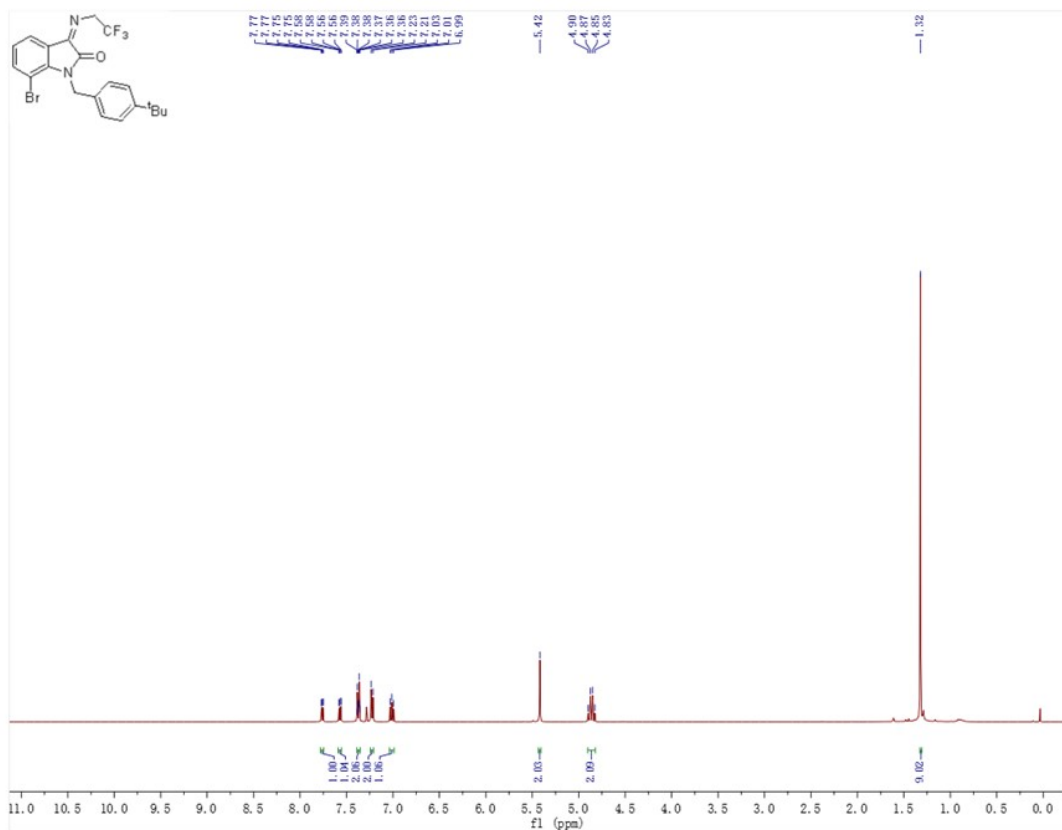

**<sup>1</sup>H NMR (CDCl<sub>3</sub>, 400 MHz) NMR of **1q****

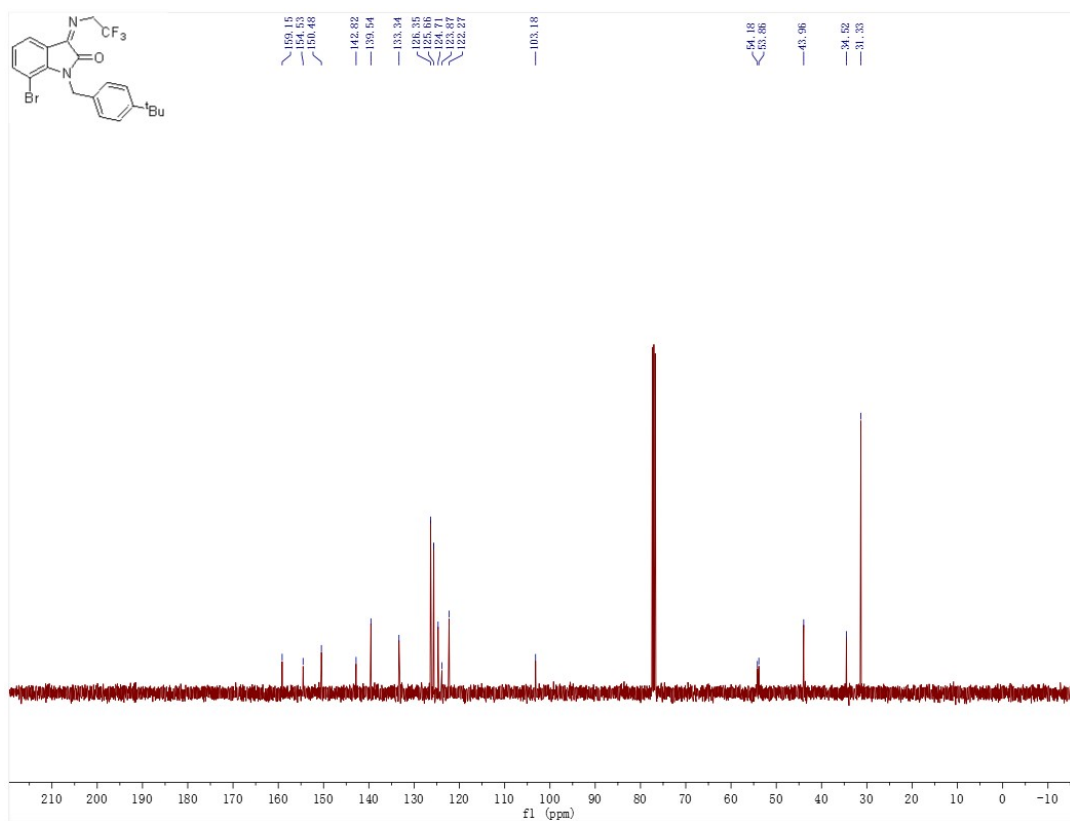

**<sup>13</sup>C NMR (CDCl<sub>3</sub>, 101 MHz) NMR of **1q****



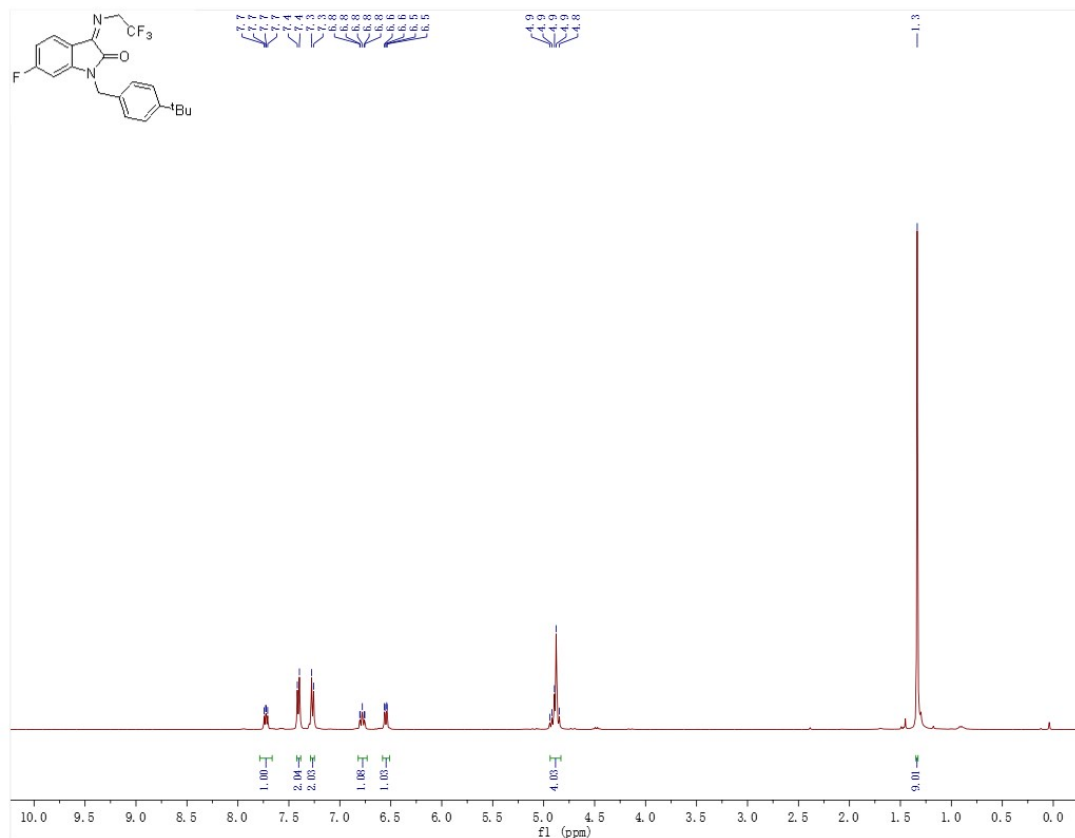

<sup>1</sup>H NMR (CDCl<sub>3</sub>, 400 MHz) NMR of **1s**

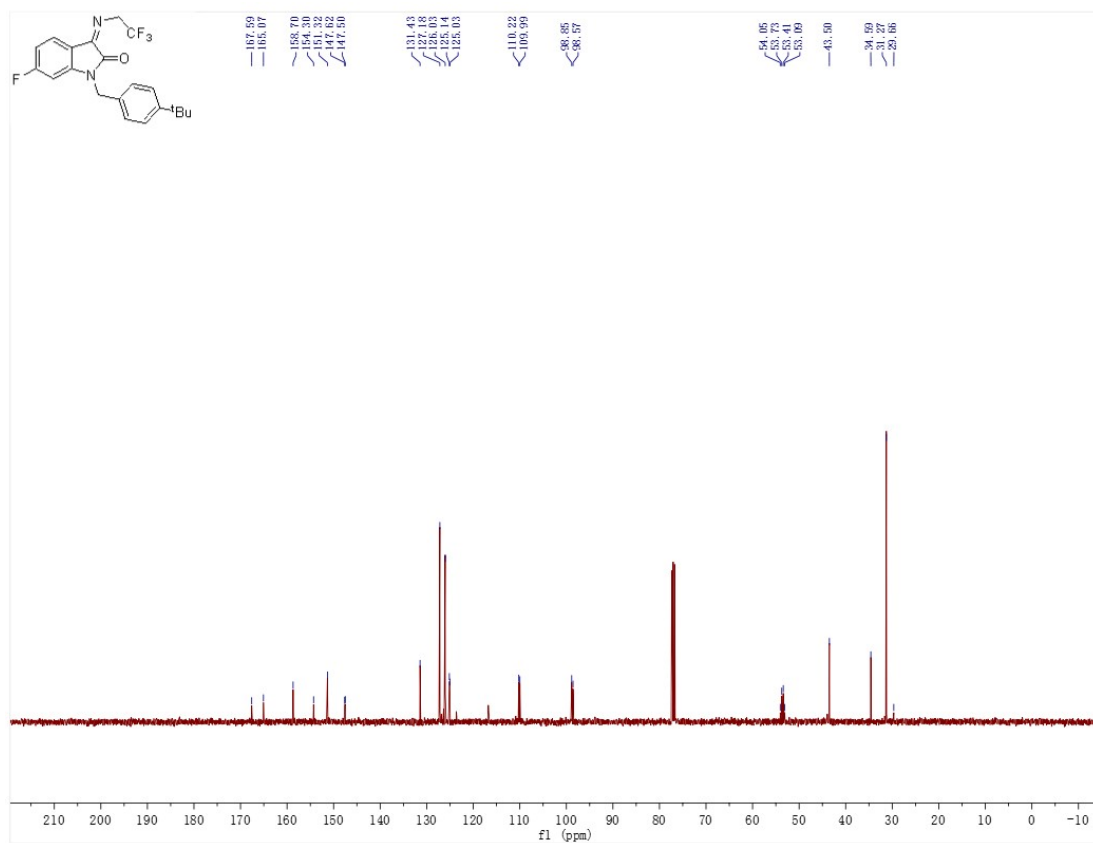

<sup>13</sup>C NMR (CDCl<sub>3</sub>, 101 MHz) NMR of **1s**

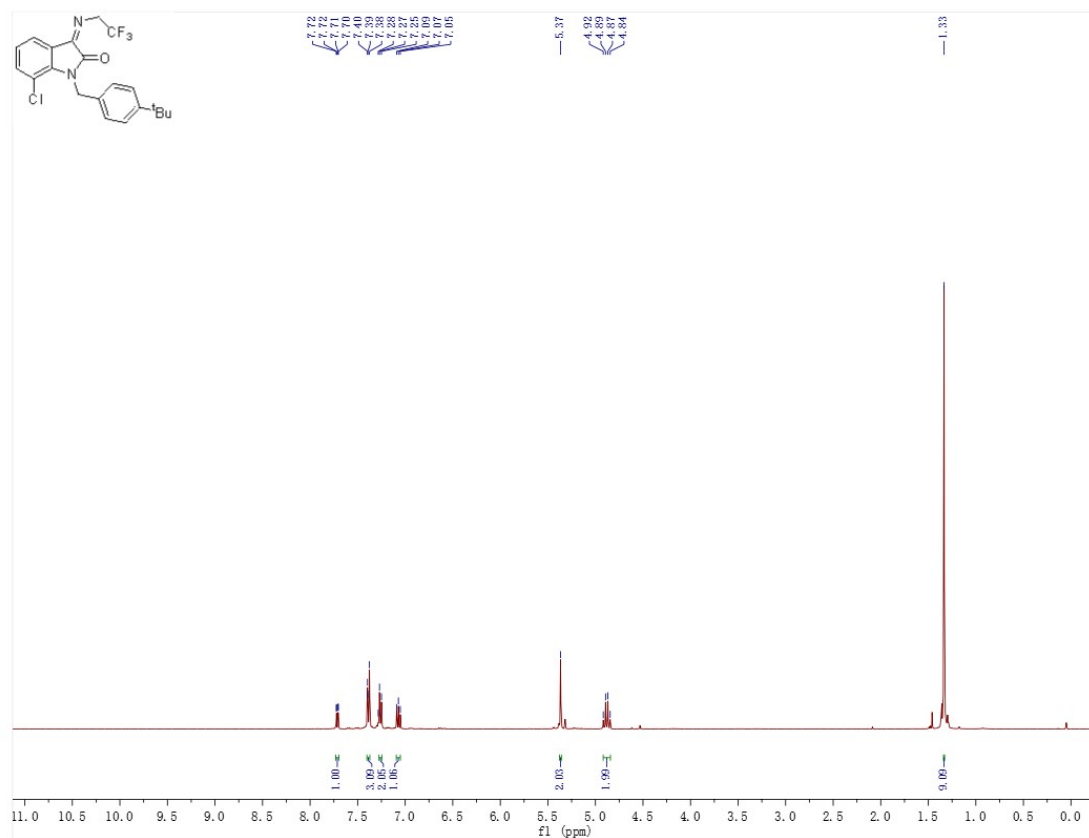

**<sup>1</sup>H NMR (CDCl<sub>3</sub>, 400 MHz) NMR of **1t****

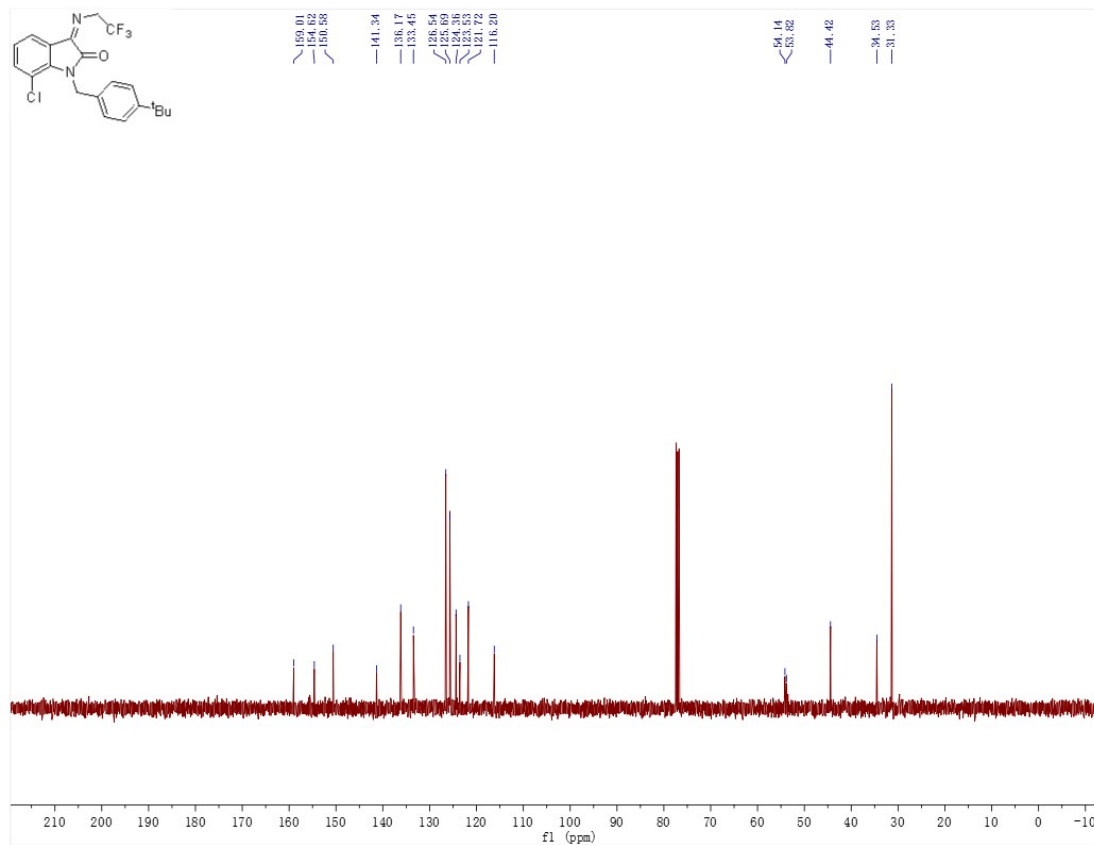

**<sup>13</sup>C NMR (CDCl<sub>3</sub>, 101 MHz) NMR of **1t****

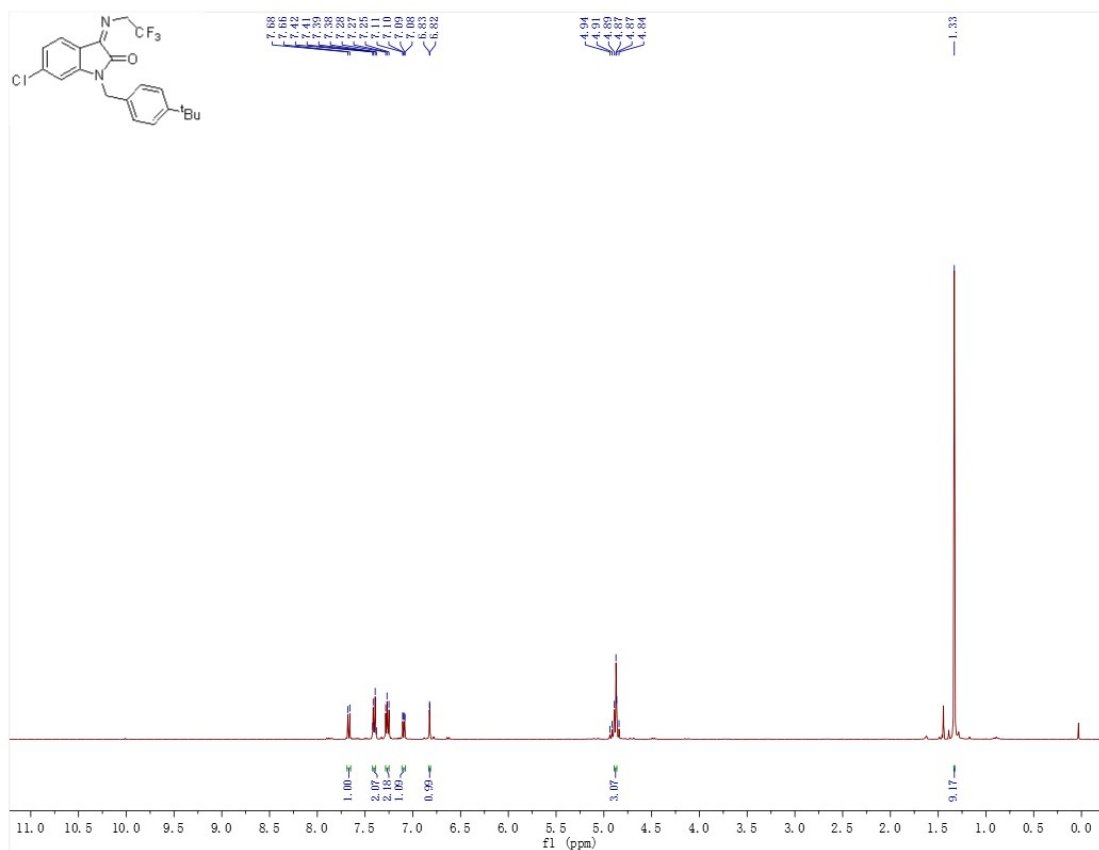

<sup>1</sup>H NMR (CDCl<sub>3</sub>, 400 MHz) NMR of **1u**

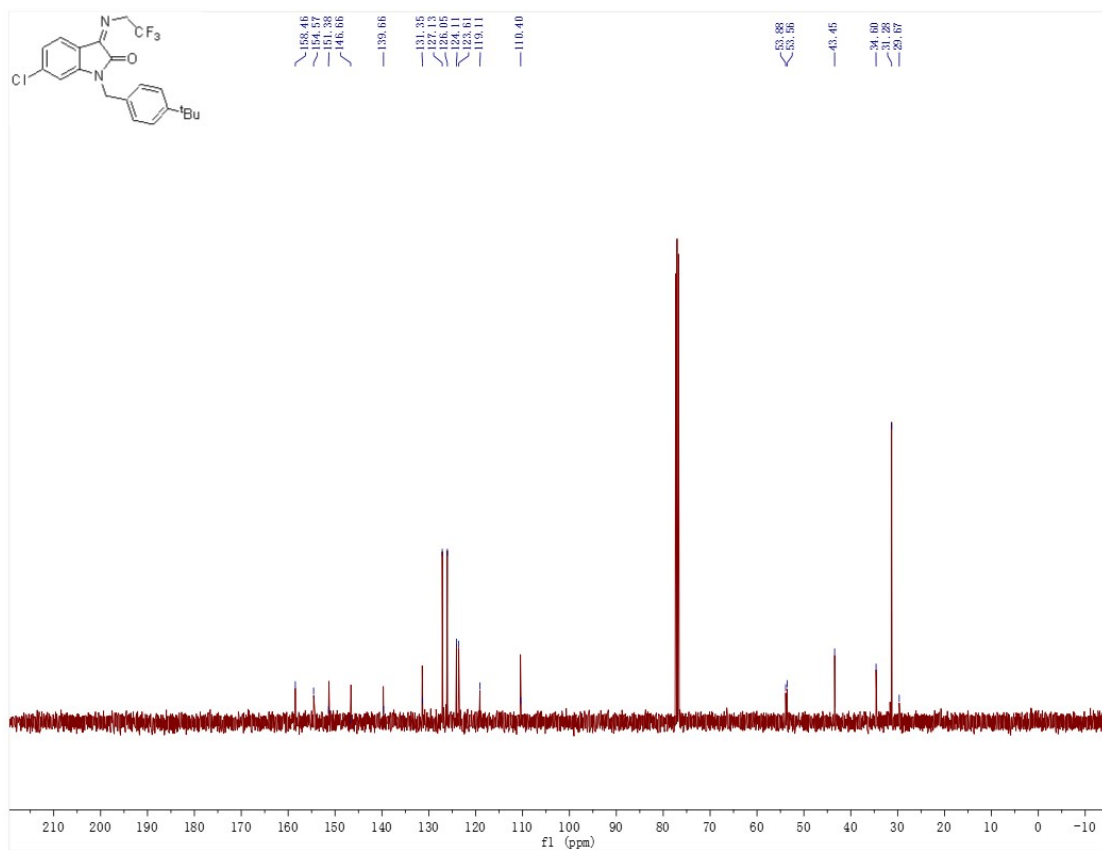

<sup>13</sup>C NMR (CDCl<sub>3</sub>, 101 MHz) NMR of **1u**

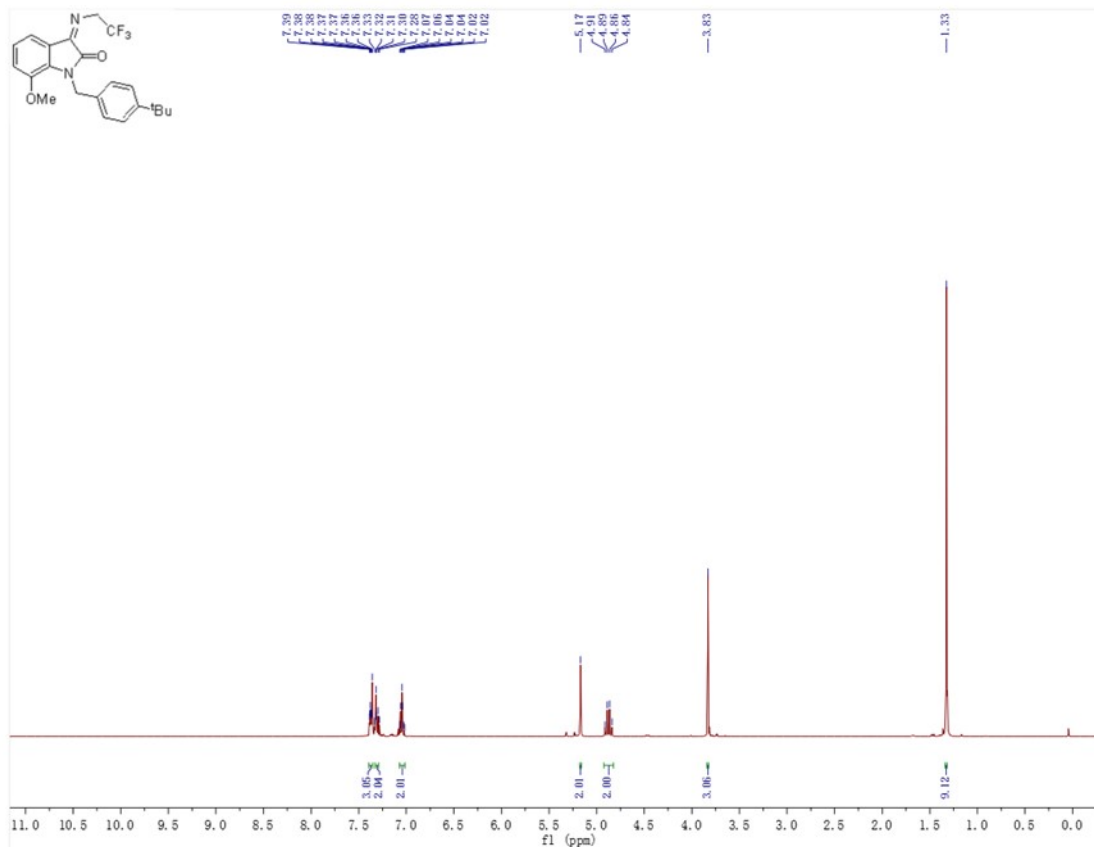

**<sup>1</sup>H NMR (CDCl<sub>3</sub>, 400 MHz) NMR of **1w****

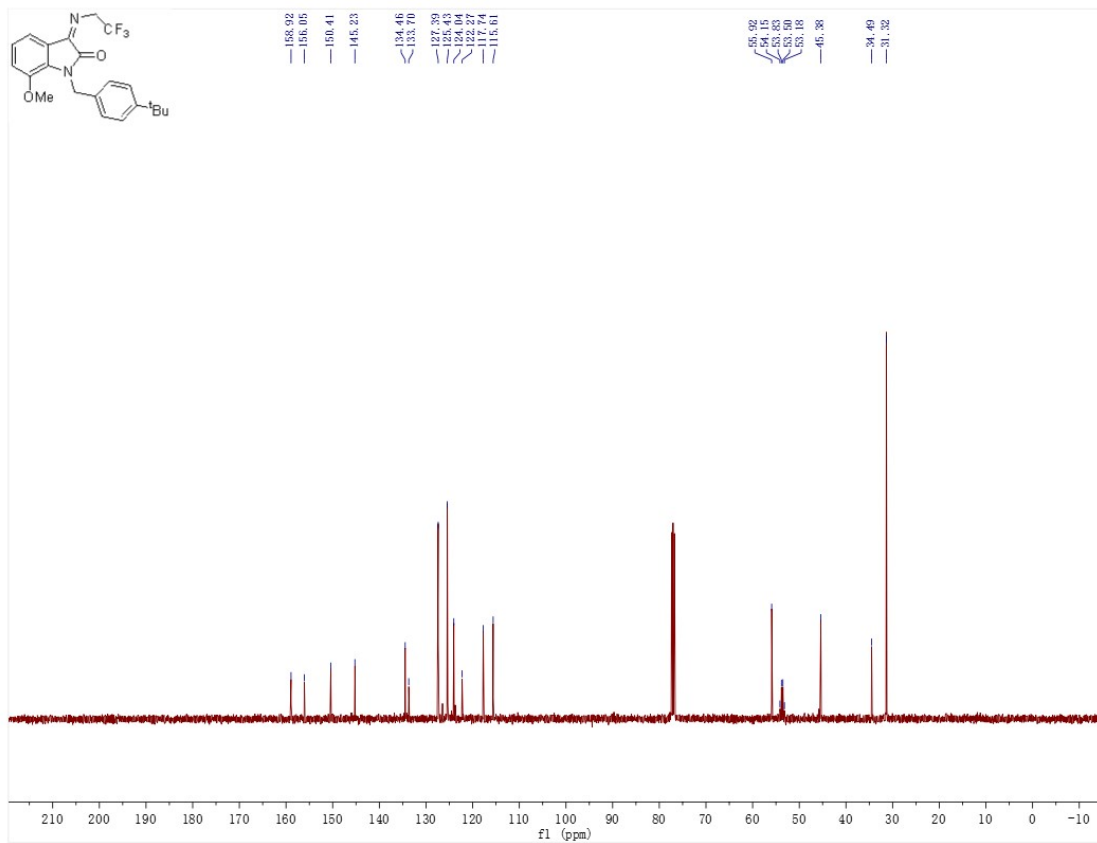

**<sup>13</sup>C NMR (CDCl<sub>3</sub>, 101 MHz) NMR of **1w****

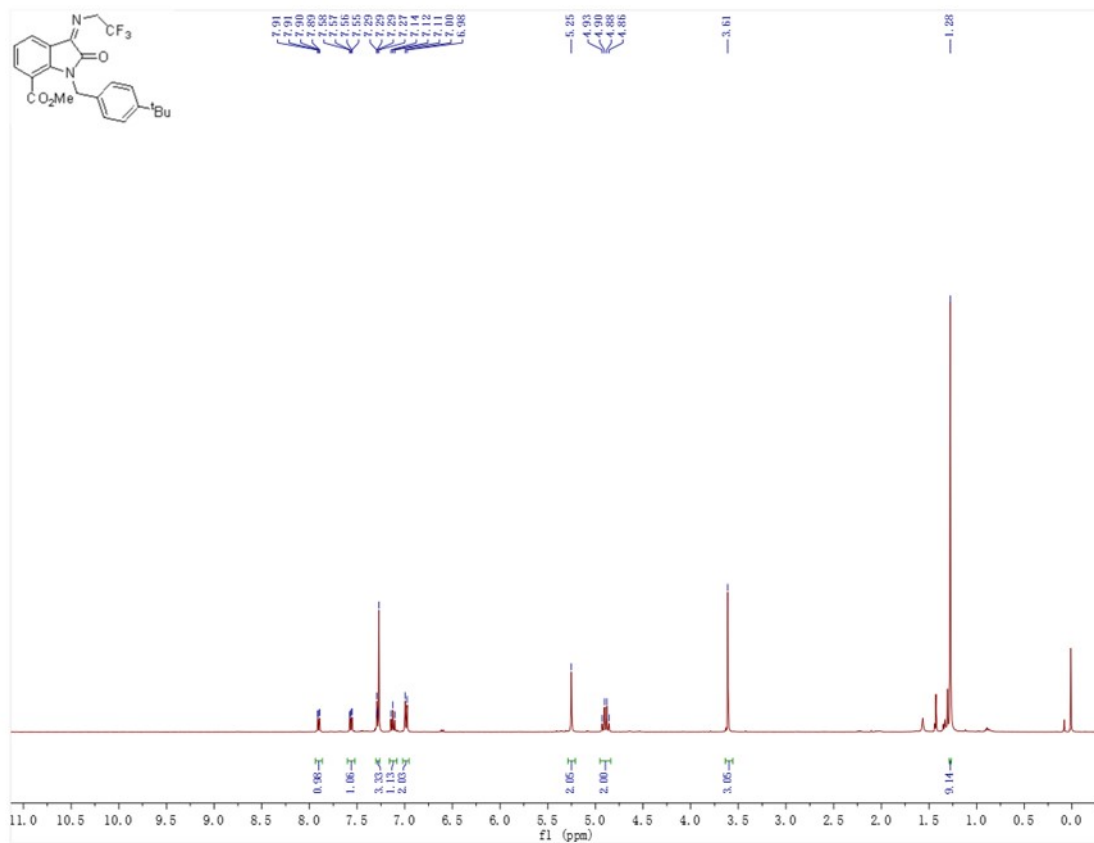

**<sup>1</sup>H NMR (CDCl<sub>3</sub>, 400 MHz) NMR of **1x****

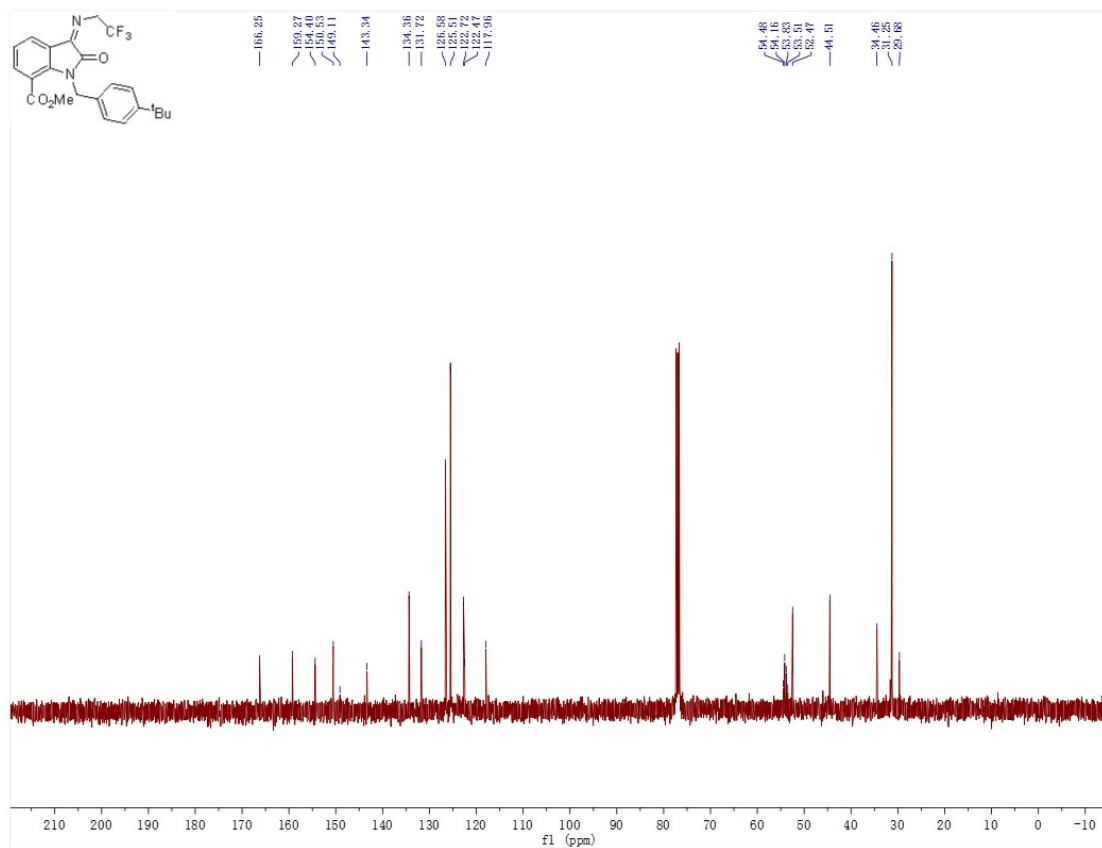

**<sup>13</sup>C NMR (CDCl<sub>3</sub>, 101 MHz) NMR of **1w****



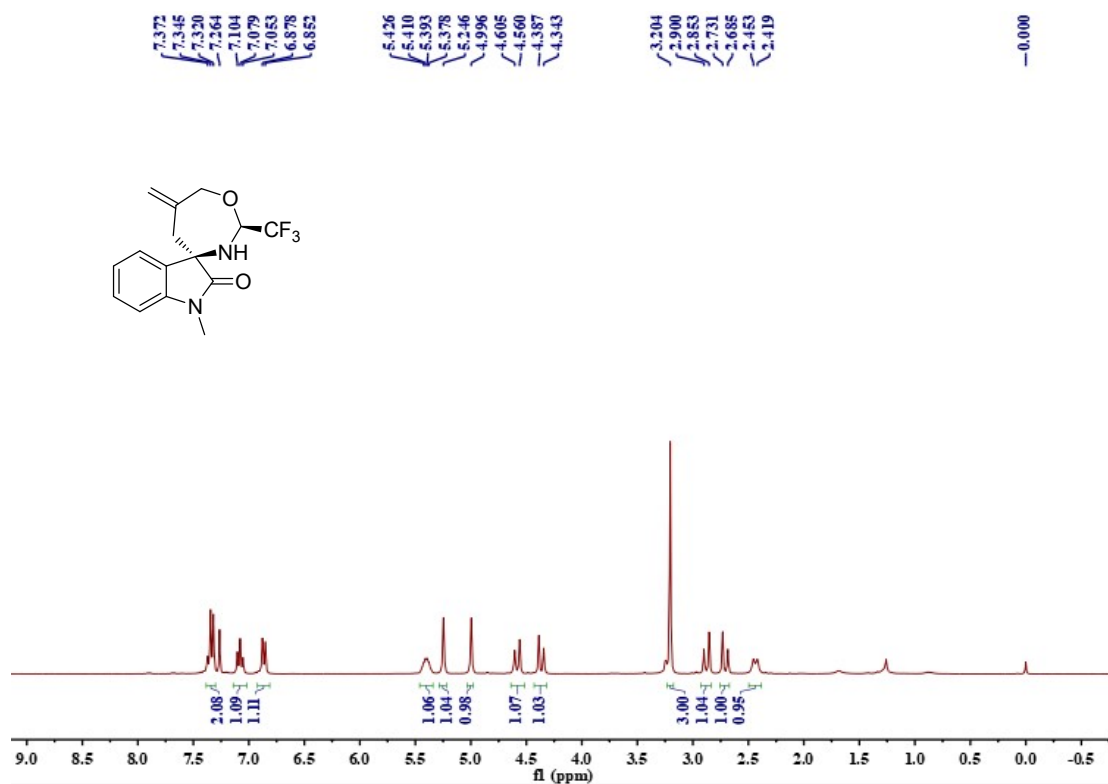

<sup>1</sup>H NMR (CDCl<sub>3</sub>, 300 MHz) NMR of **3a**

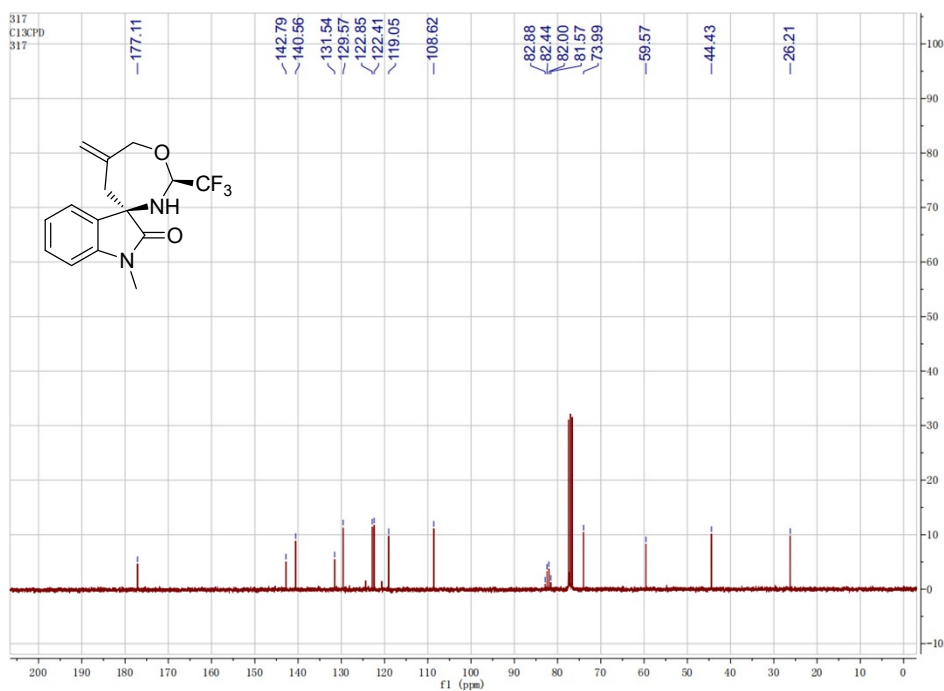

<sup>13</sup>C NMR (CDCl<sub>3</sub>, 75 MHz) NMR of **3a**

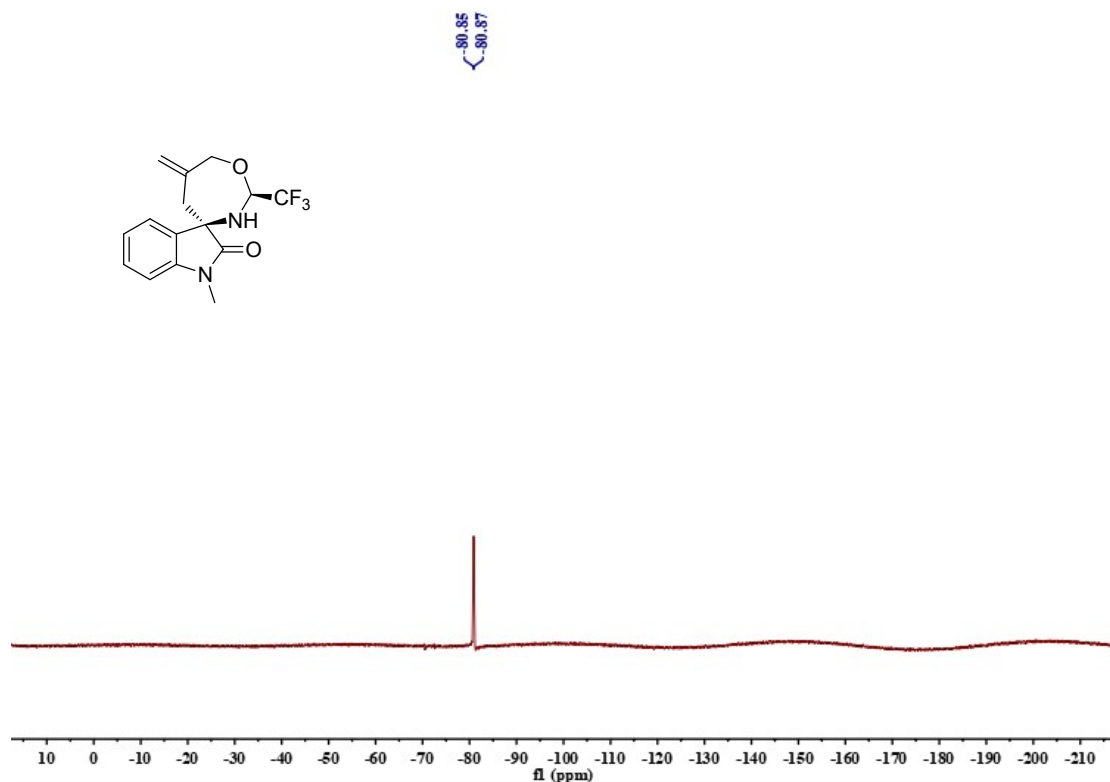

$^{19}\text{F}$  NMR ( $\text{CDCl}_3$ , 282 MHz) NMR of **3a**

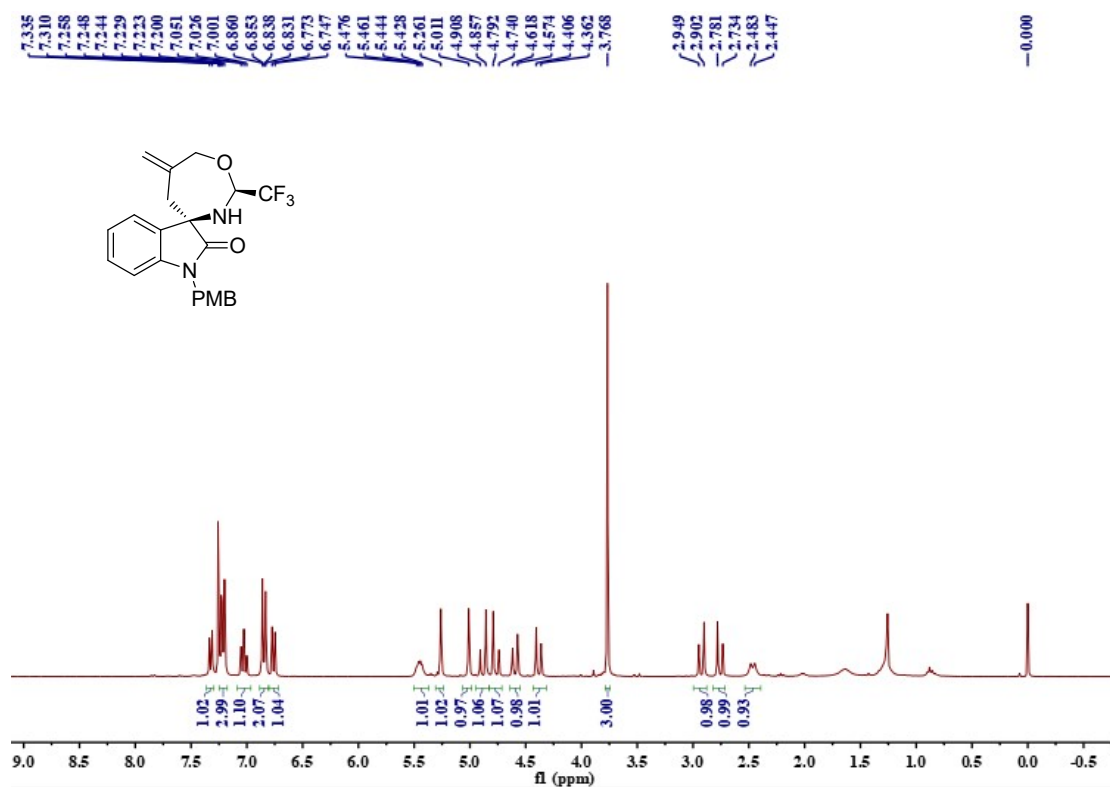

$^1\text{H}$  NMR ( $\text{CDCl}_3$ , 300 MHz) NMR of **3b**

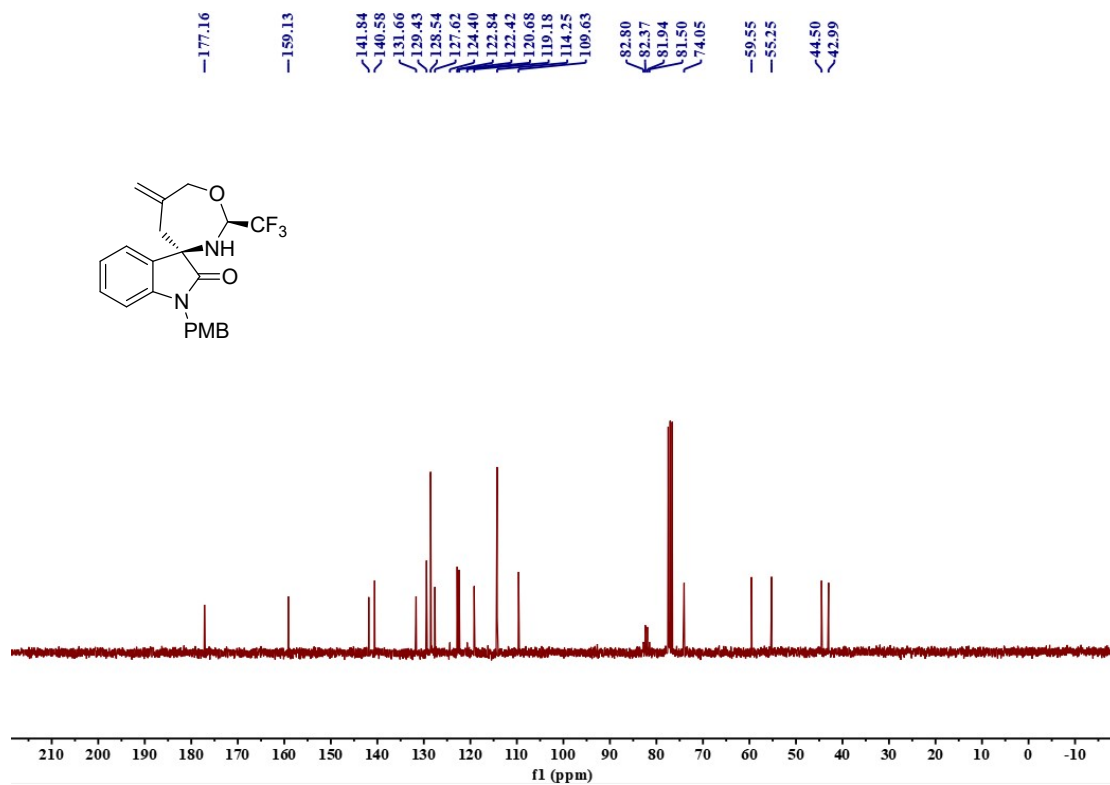

<sup>13</sup>C NMR (CDCl<sub>3</sub>, 75 MHz) NMR of **3b**

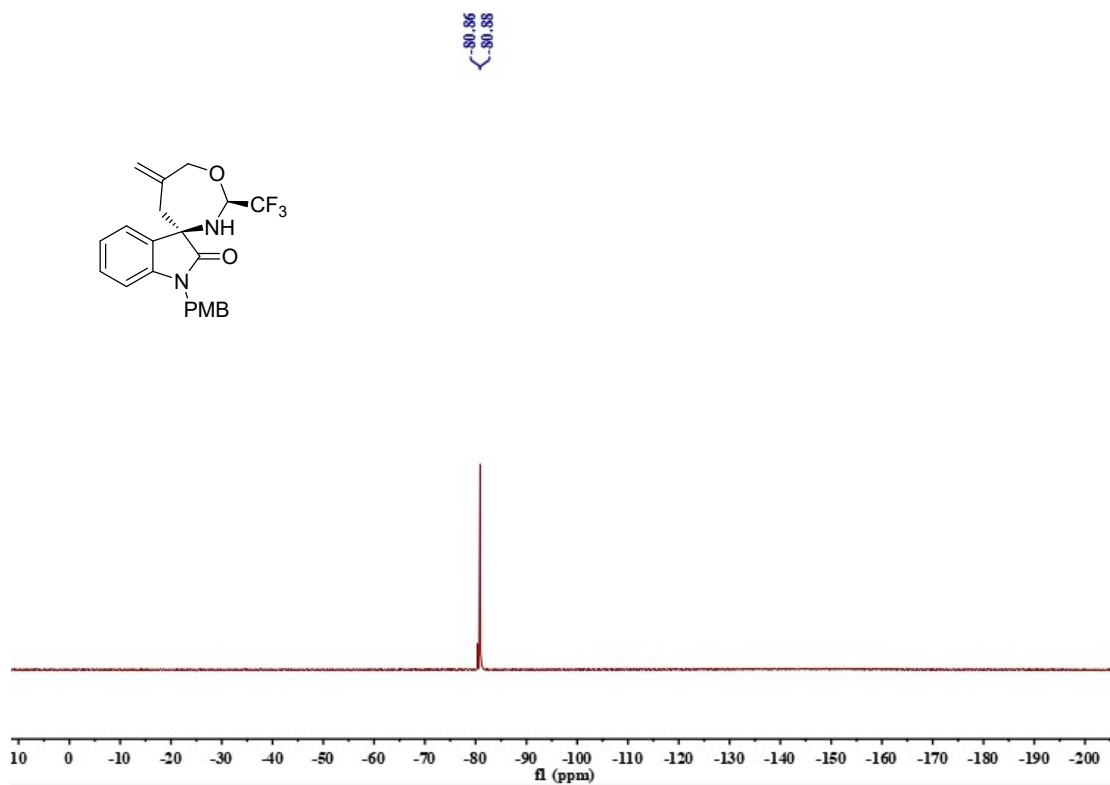

<sup>19</sup>F NMR (CDCl<sub>3</sub>, 282 MHz) NMR of **3b**

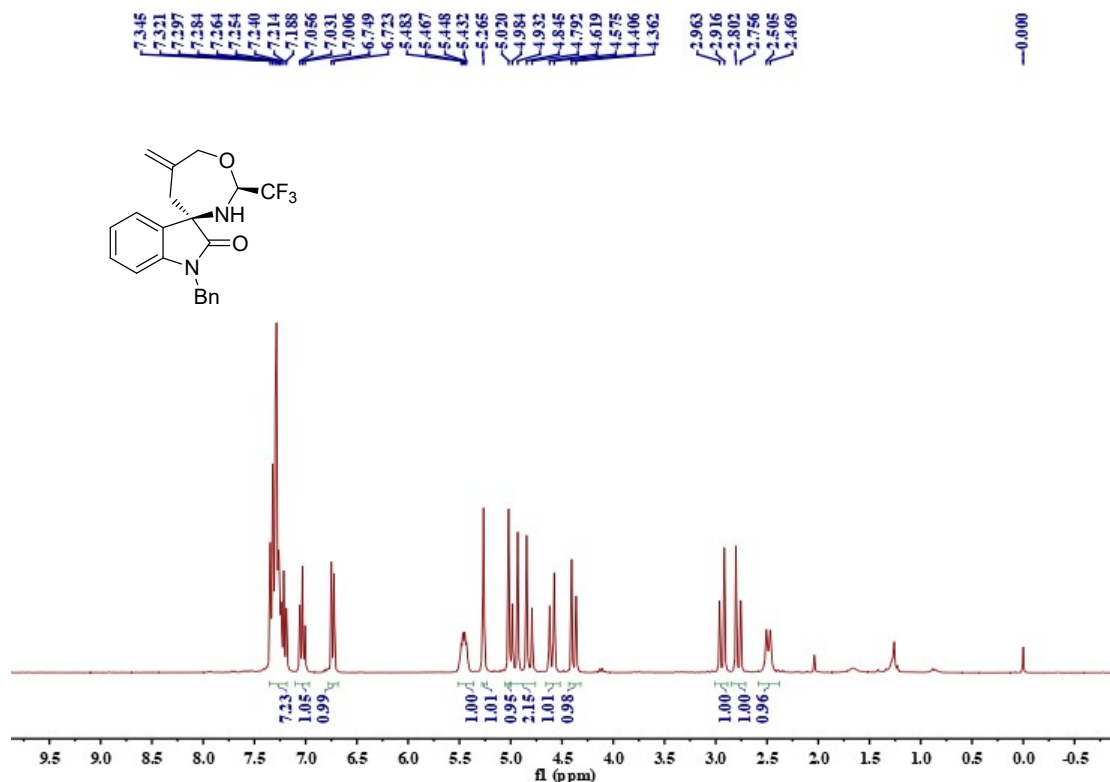

**<sup>1</sup>H NMR (CDCl<sub>3</sub>, 300 MHz) NMR of 3c**

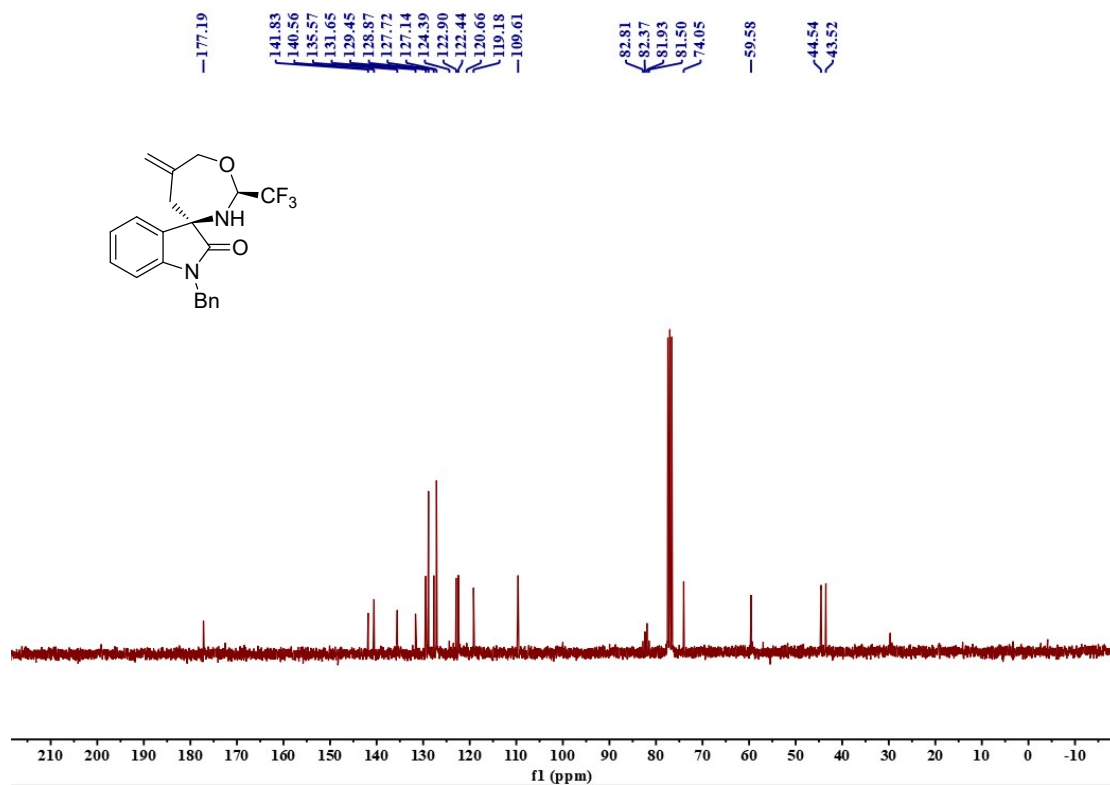

**<sup>13</sup>C NMR (CDCl<sub>3</sub>, 75 MHz) NMR of 3c**

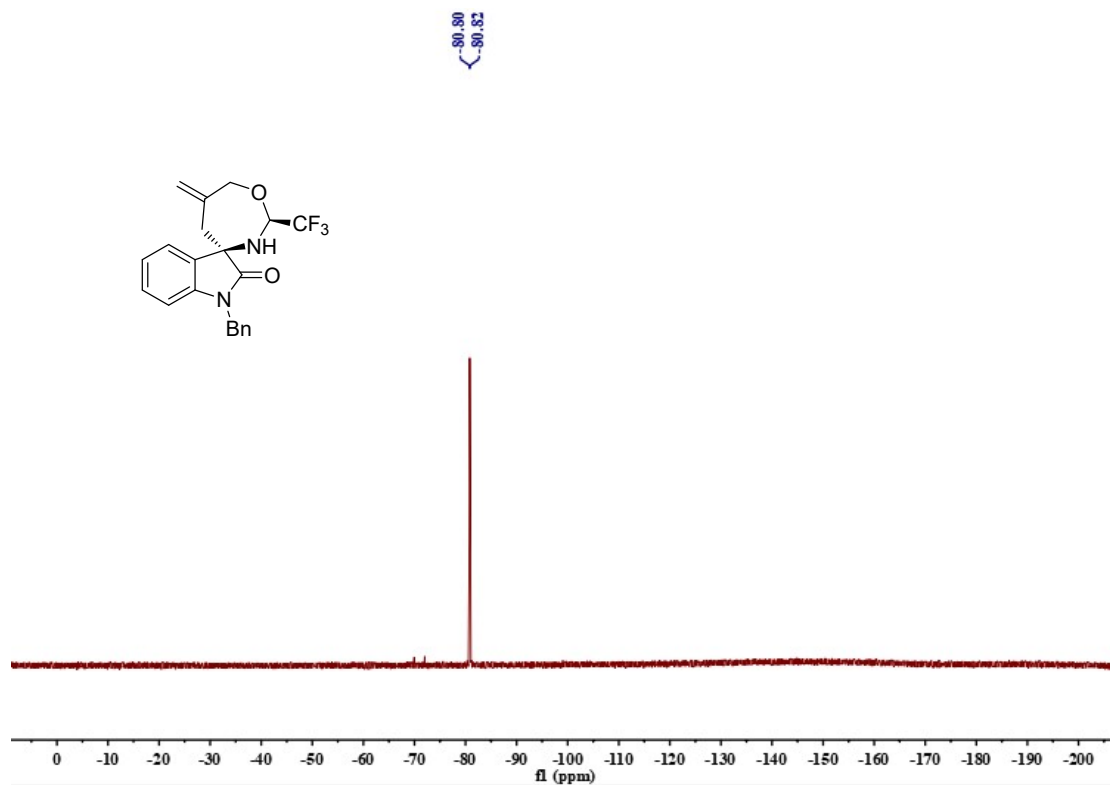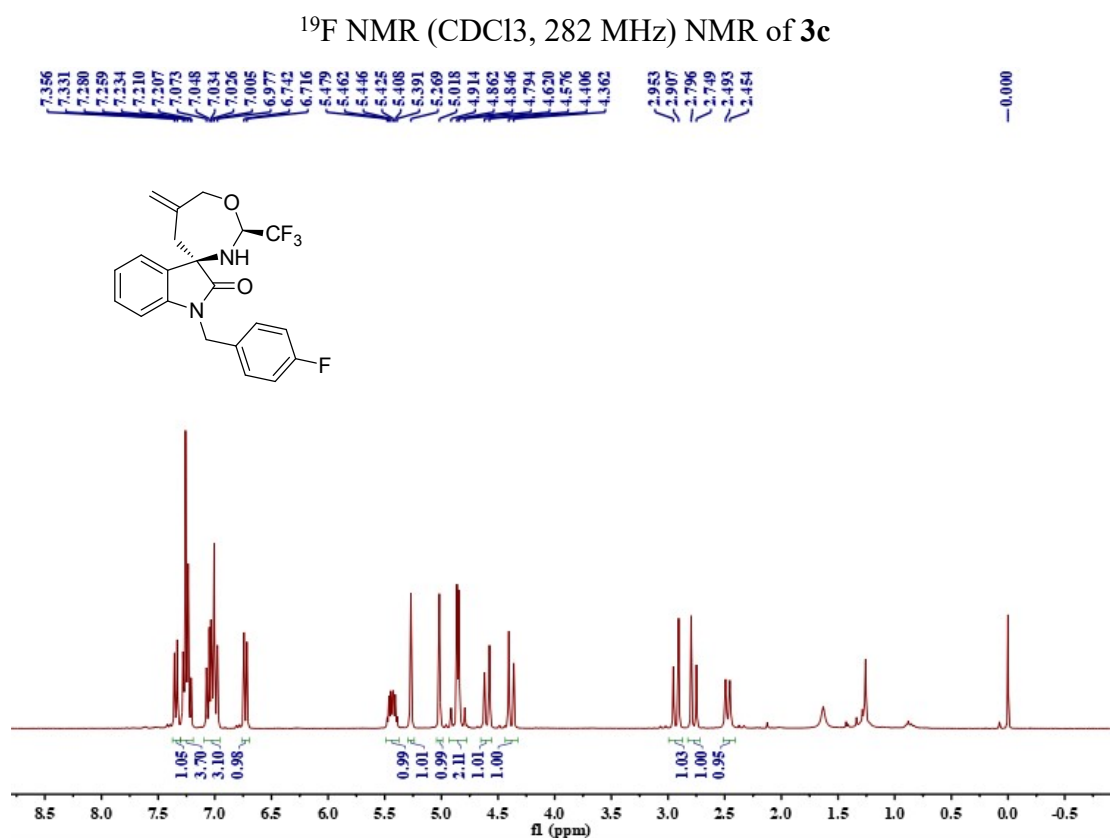

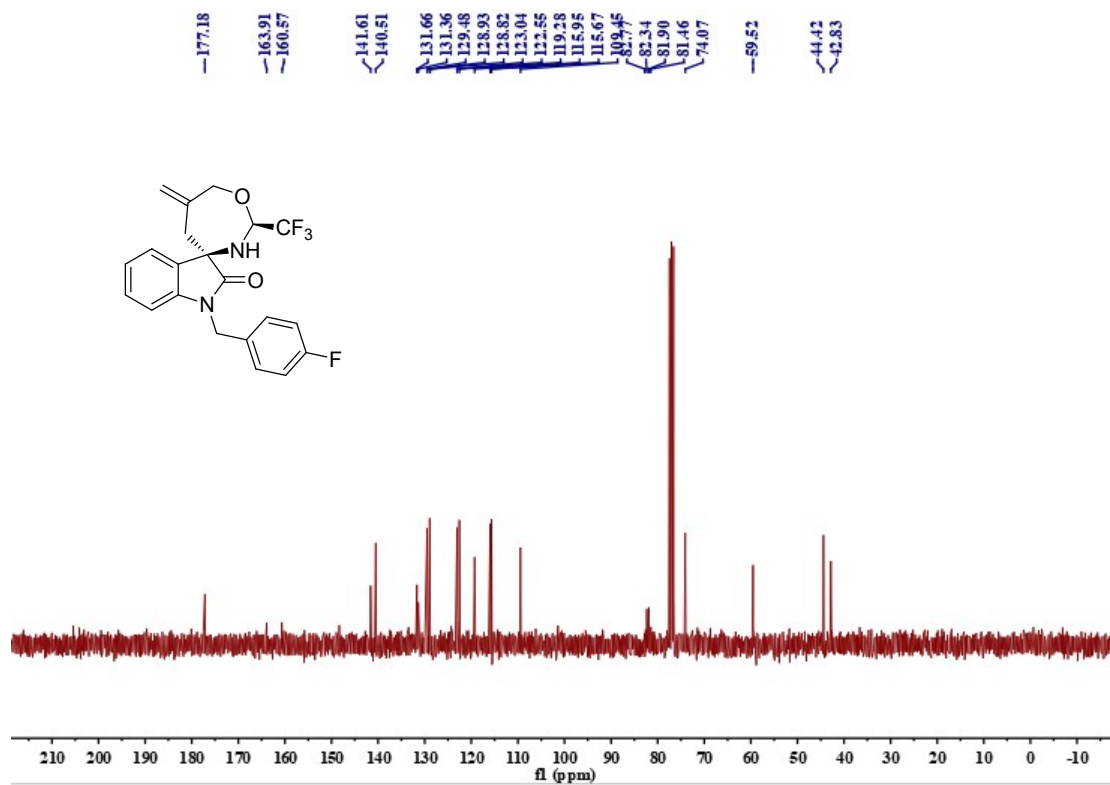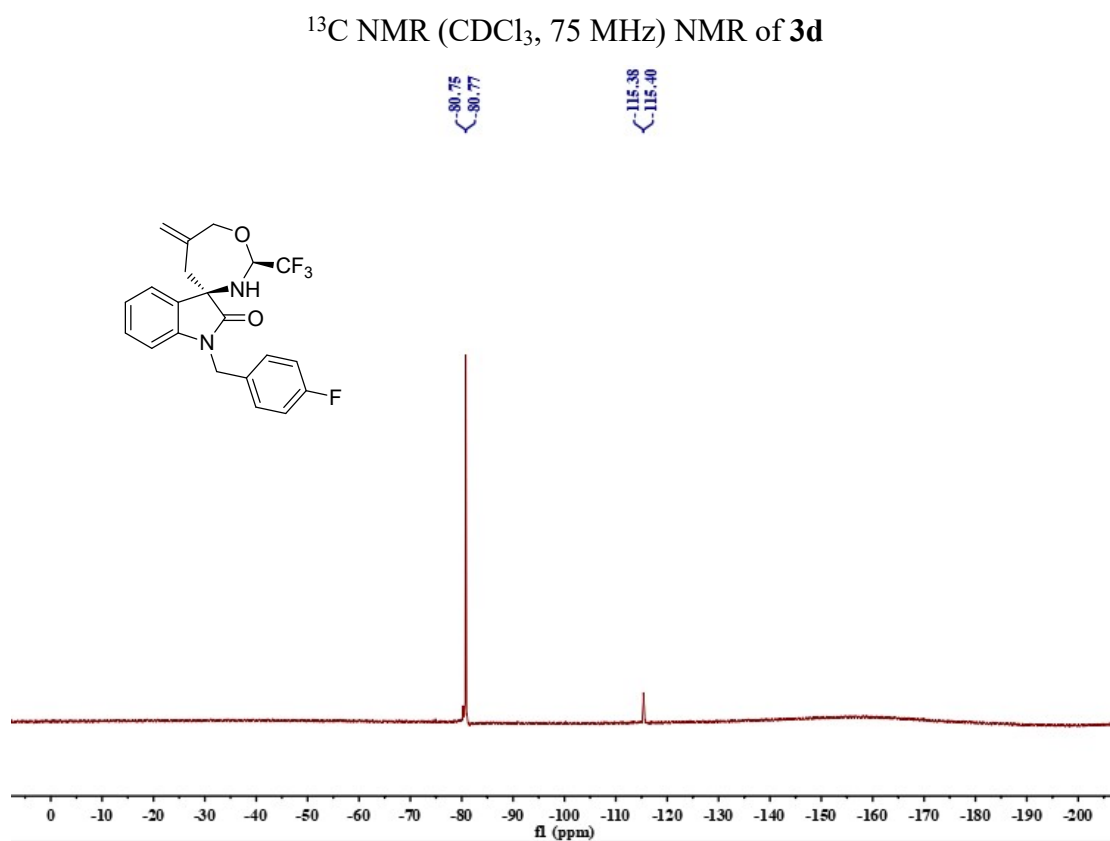

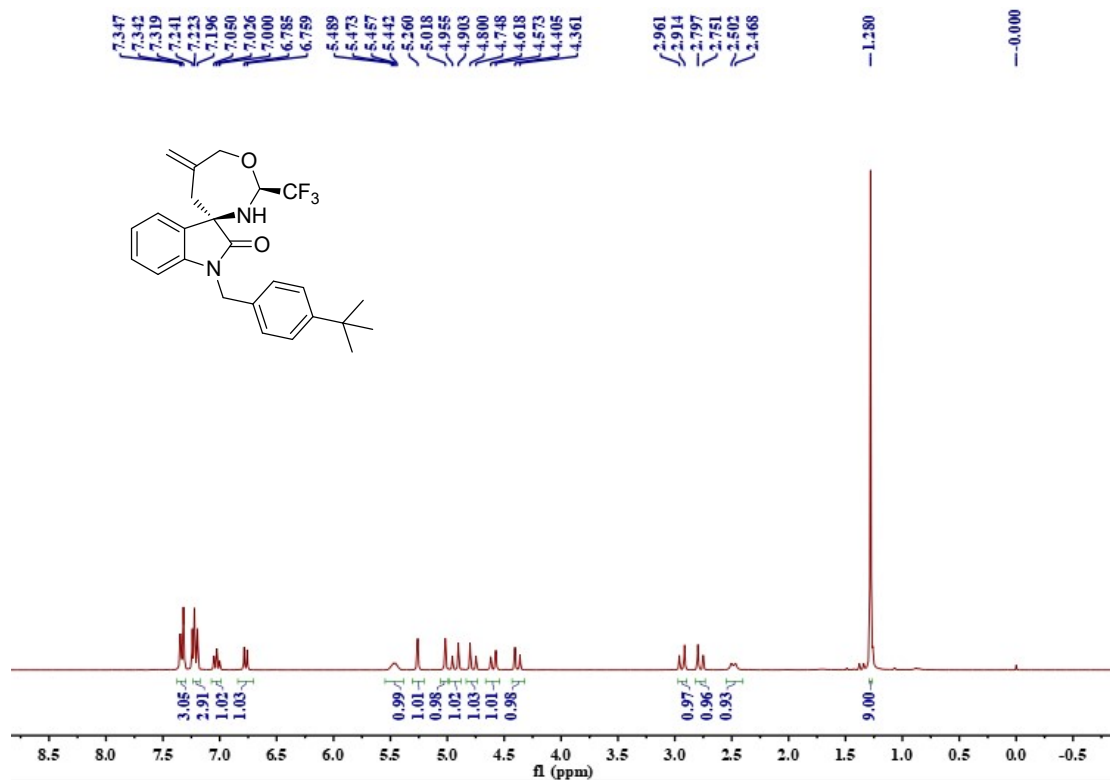

<sup>1</sup>H NMR (CDCl<sub>3</sub>, 300 MHz) NMR of **3e**

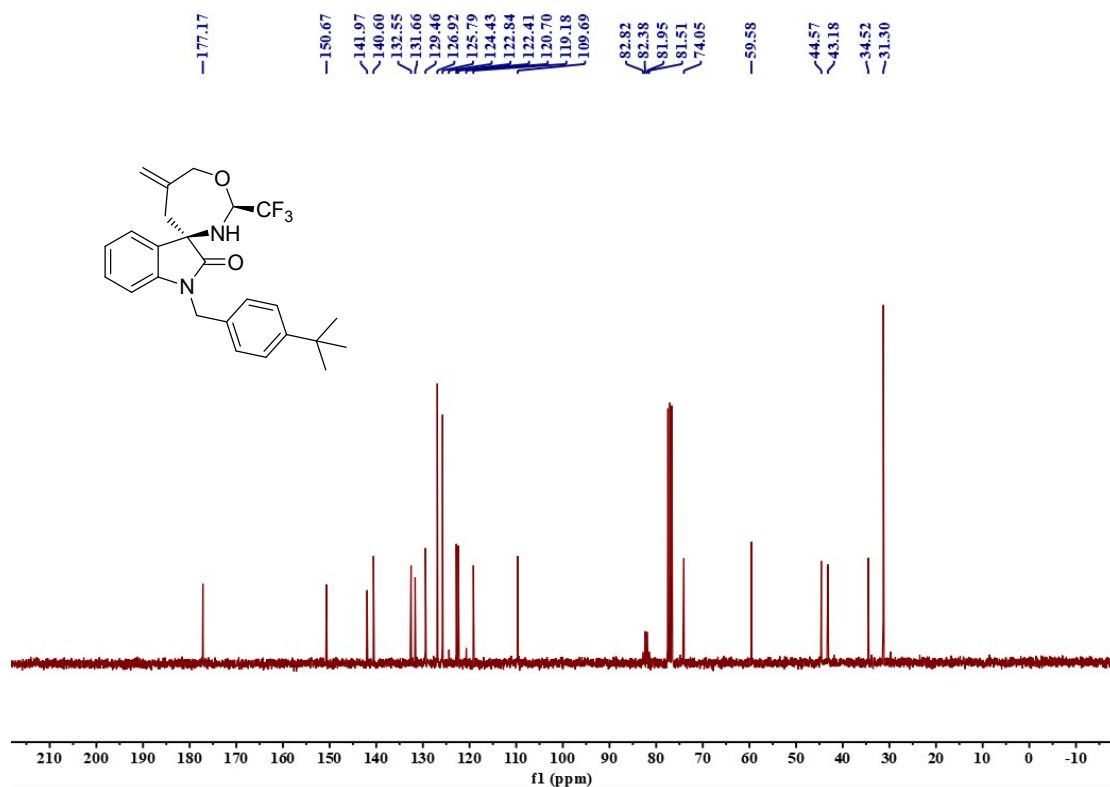

<sup>13</sup>C NMR (CDCl<sub>3</sub>, 75 MHz) NMR of **3e**

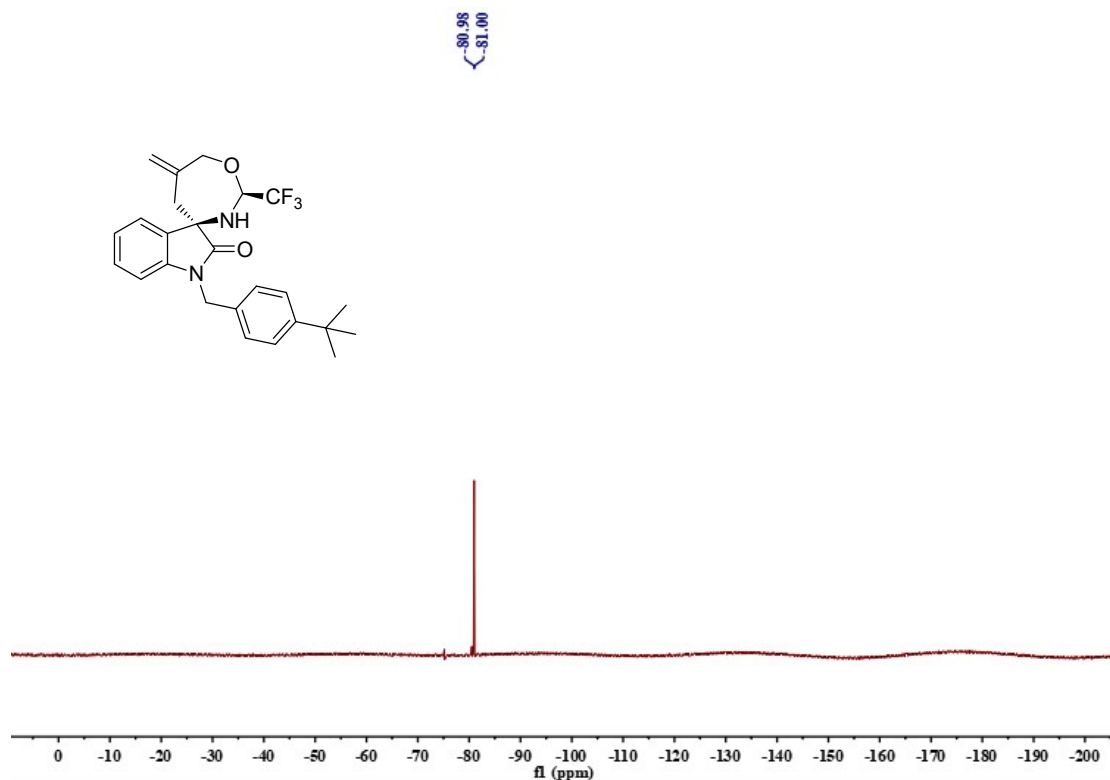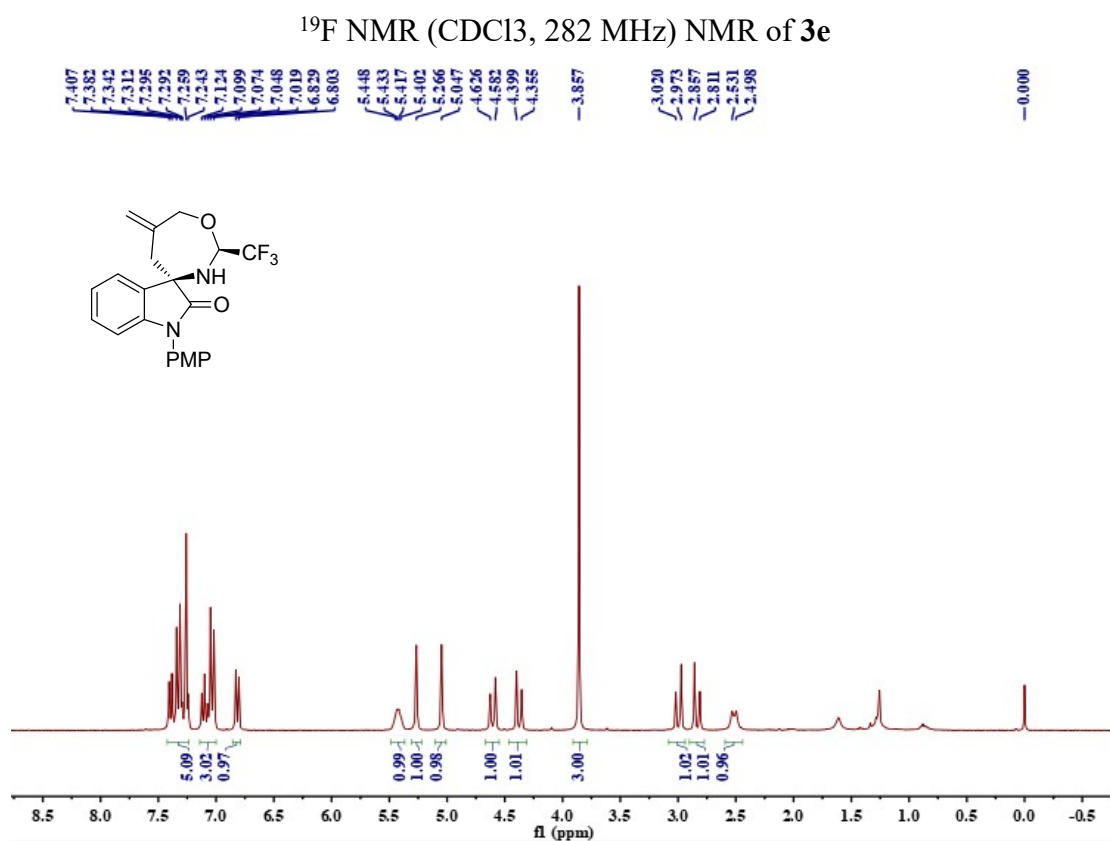

$^1\text{H}$  NMR (CDCl<sub>3</sub>, 300 MHz) NMR of **3f**



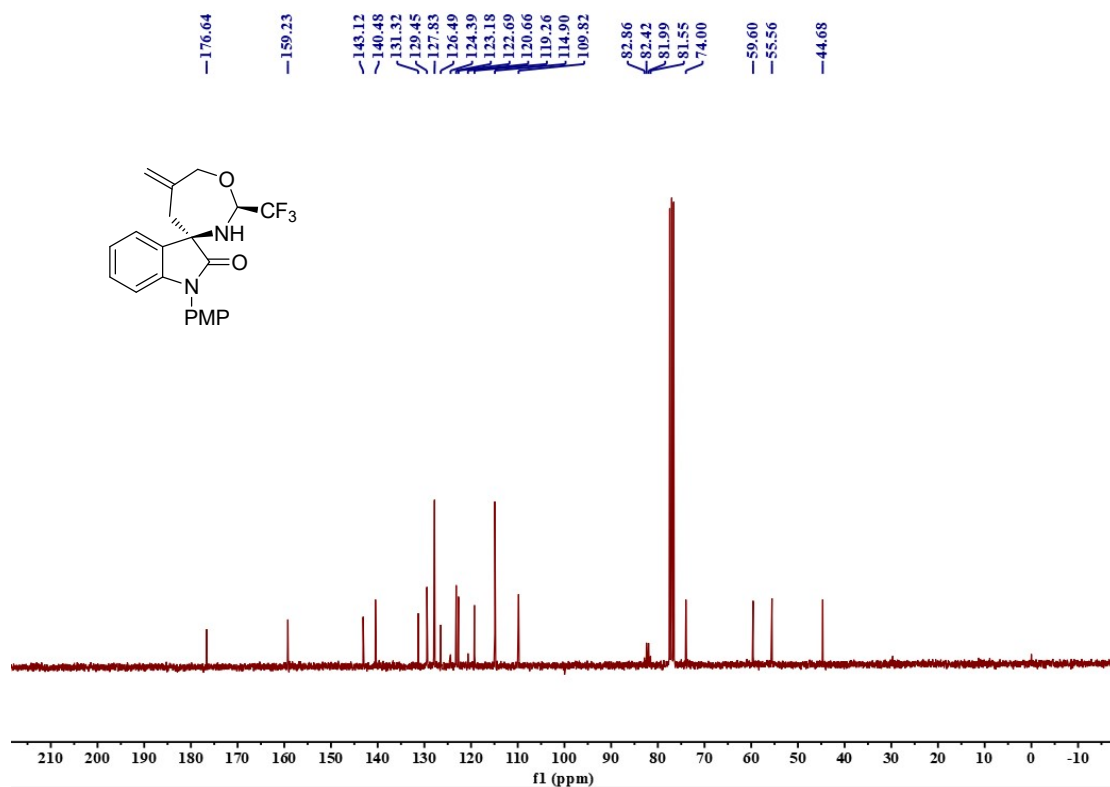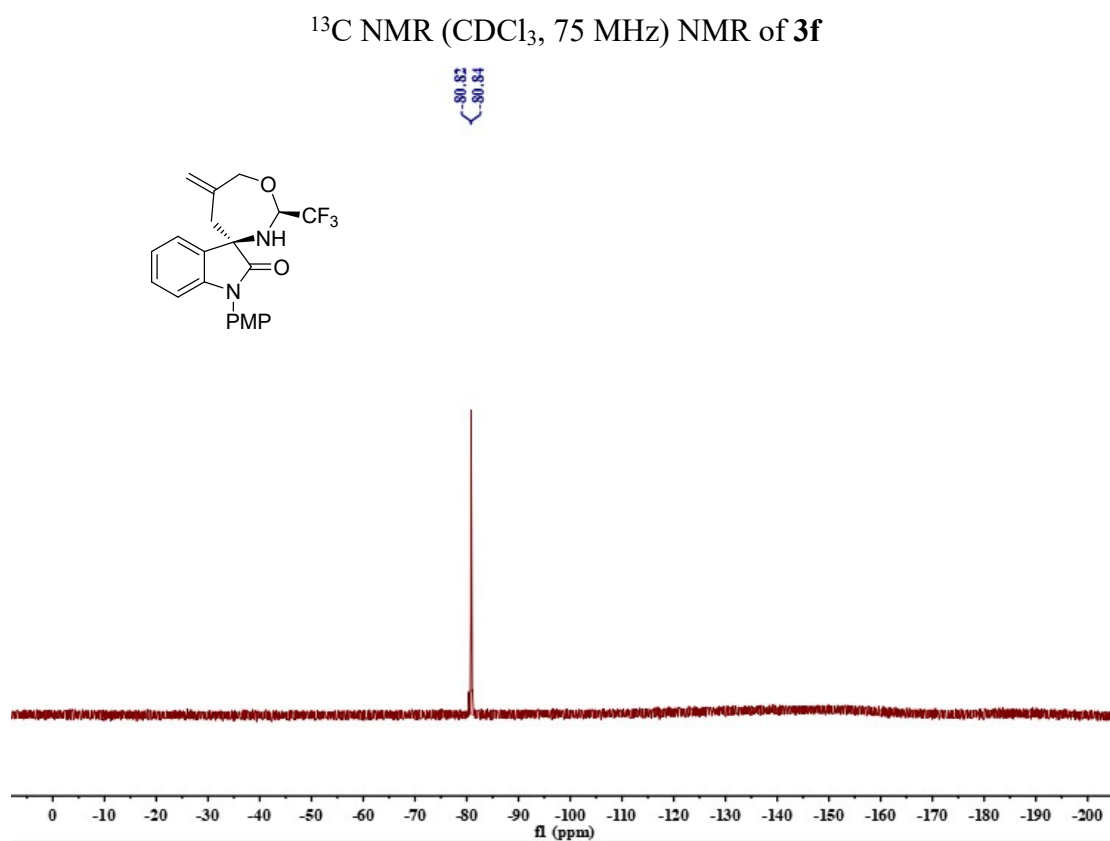

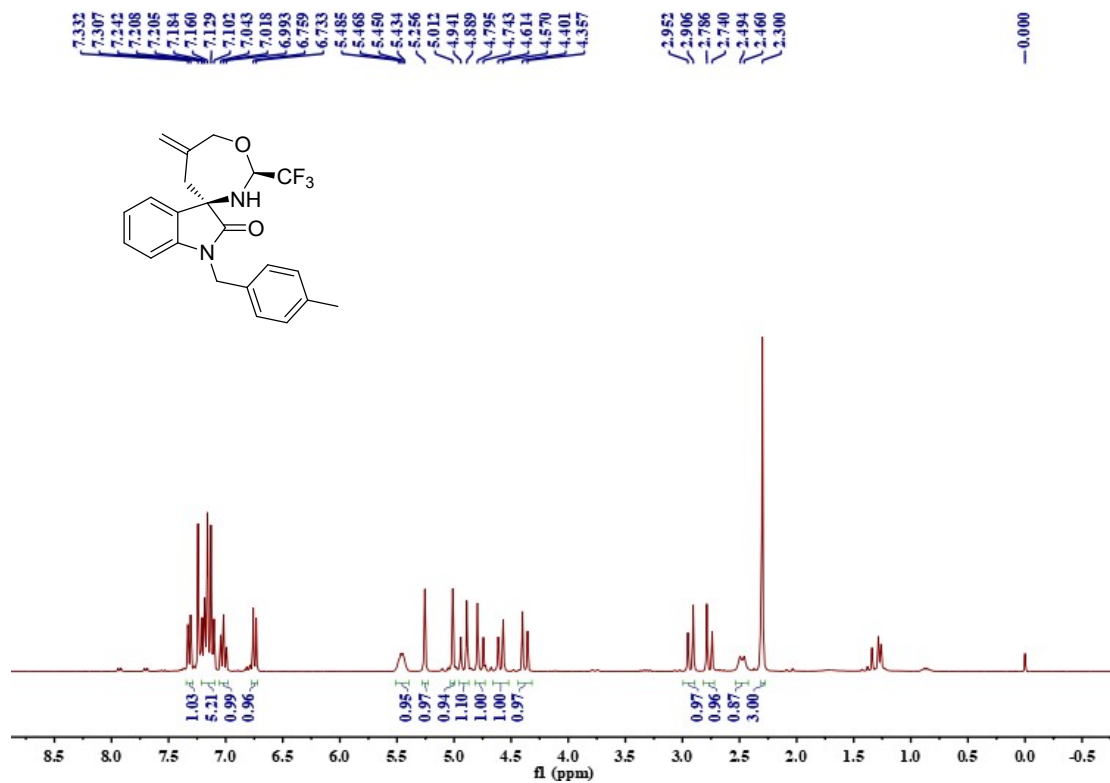

<sup>1</sup>H NMR (CDCl<sub>3</sub>, 300 MHz) NMR of **3g**

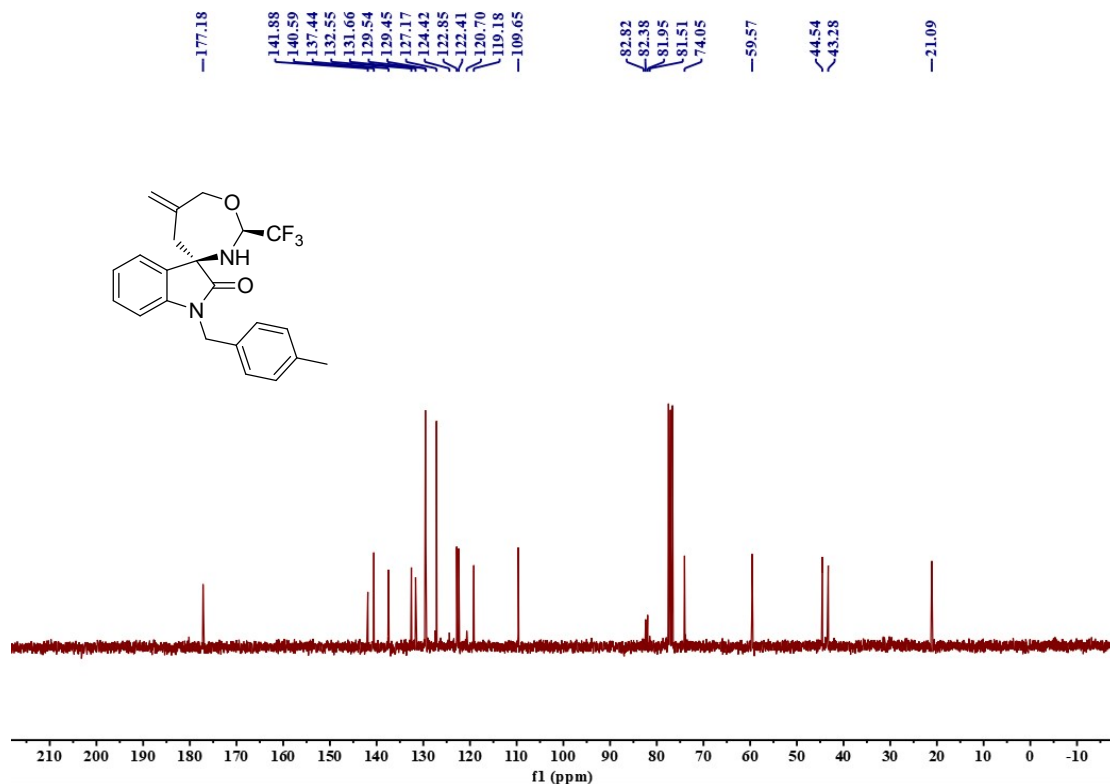

<sup>13</sup>C NMR (CDCl<sub>3</sub>, 75 MHz) NMR of **3g**

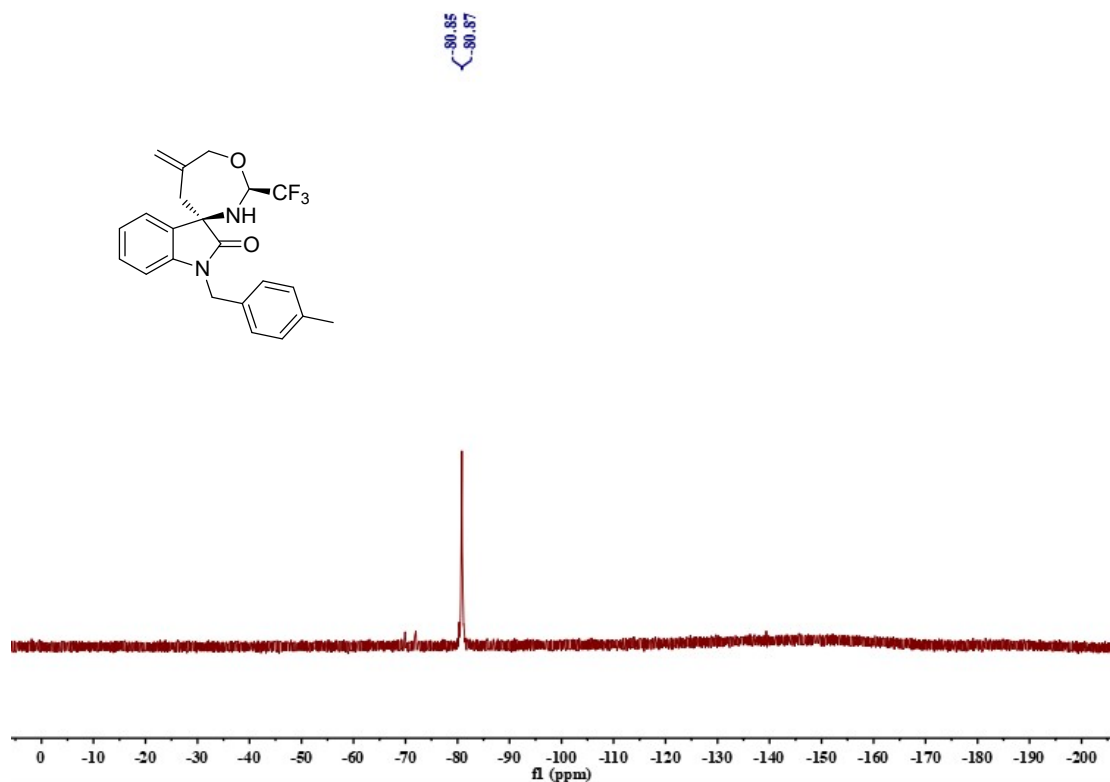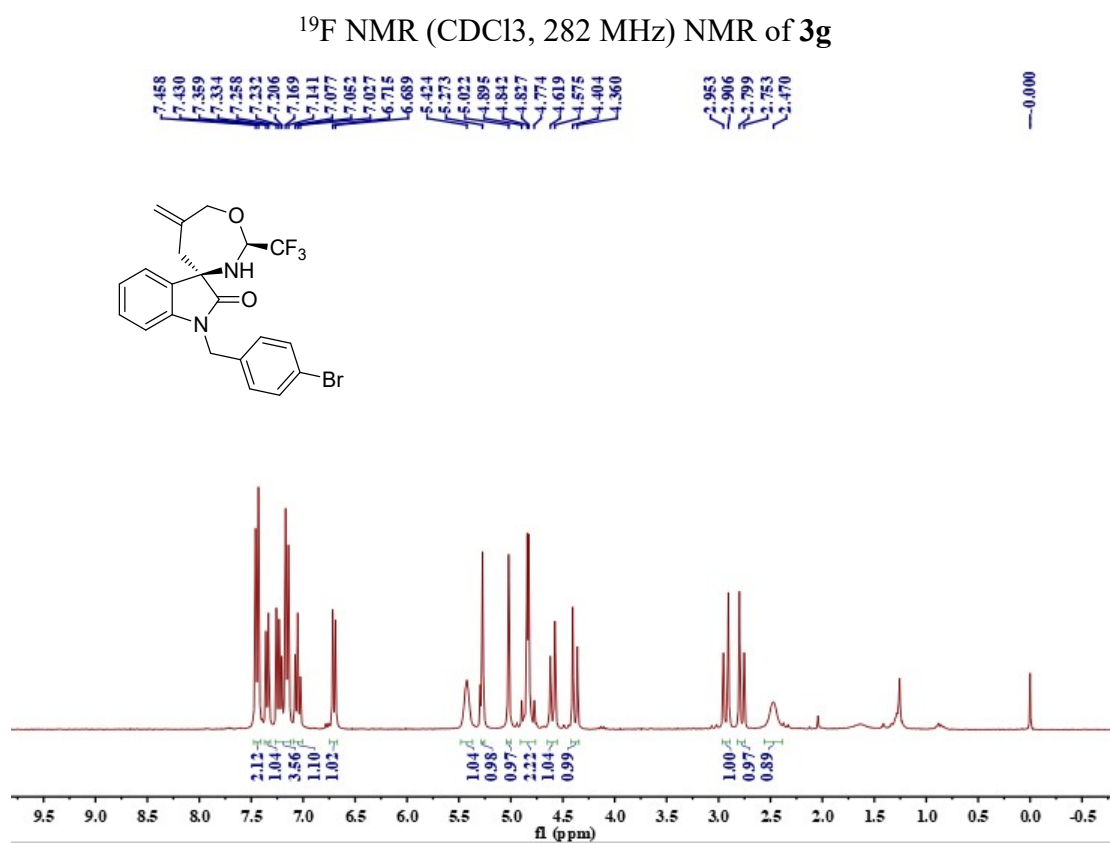

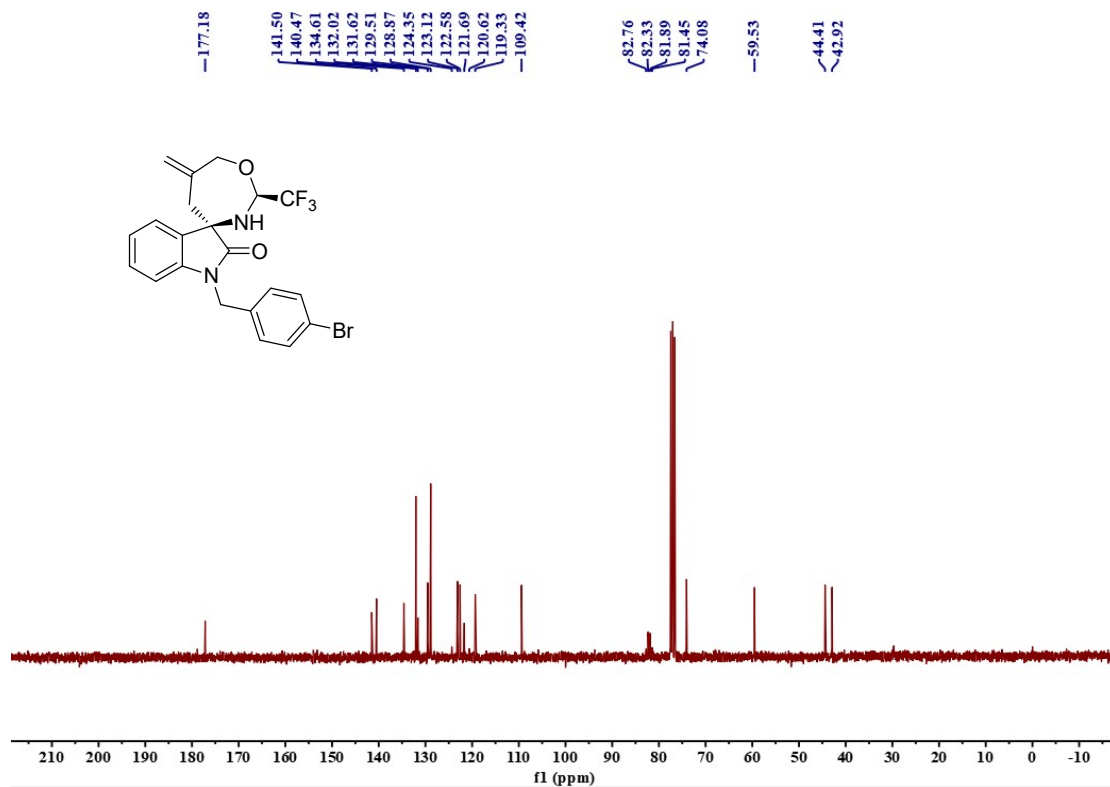

$^{13}\text{C}$  NMR ( $\text{CDCl}_3$ , 75 MHz) NMR of **3h**

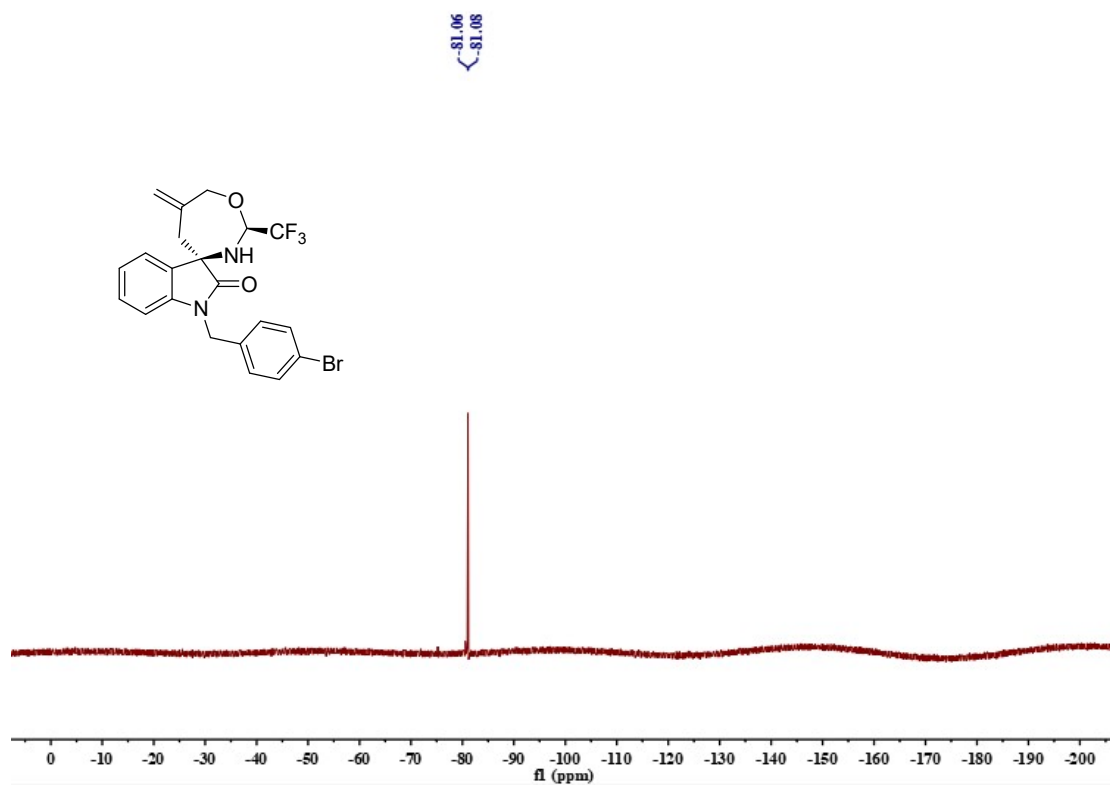

$^{19}\text{F}$  NMR ( $\text{CDCl}_3$ , 282 MHz) NMR of **3h**

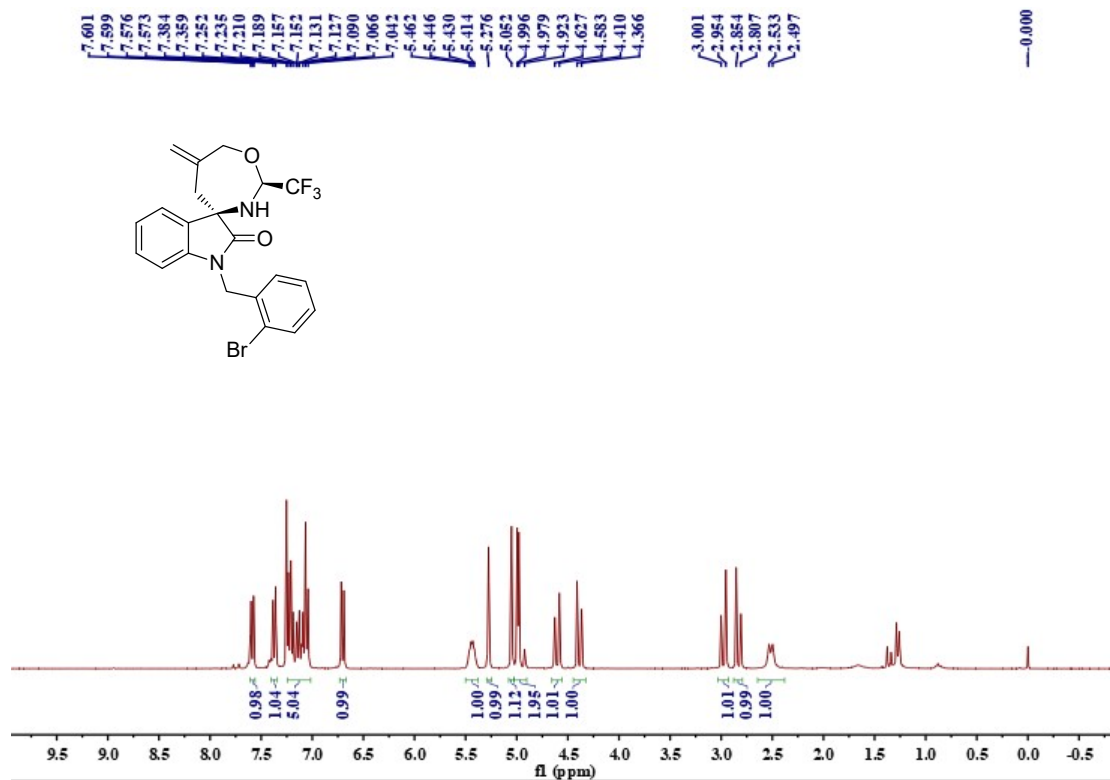

<sup>1</sup>H NMR (CDCl<sub>3</sub>, 300 MHz) NMR of **3i**

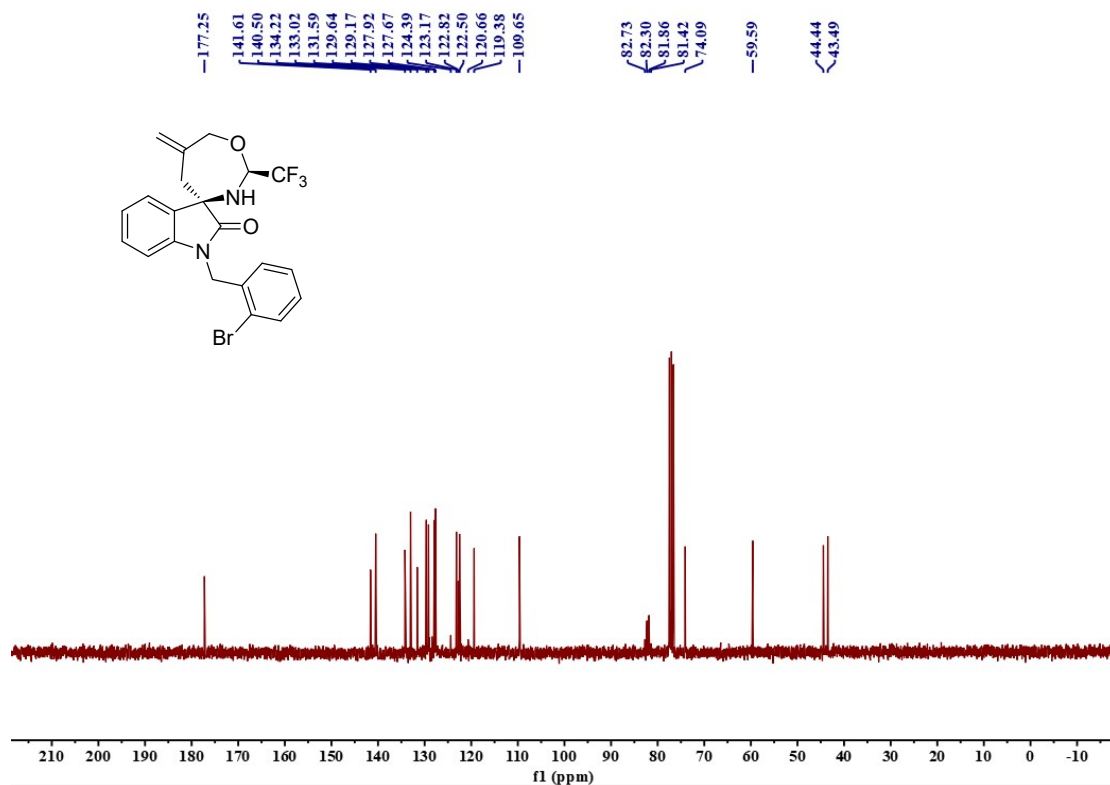

<sup>13</sup>C NMR (CDCl<sub>3</sub>, 75 MHz) NMR of **3i**

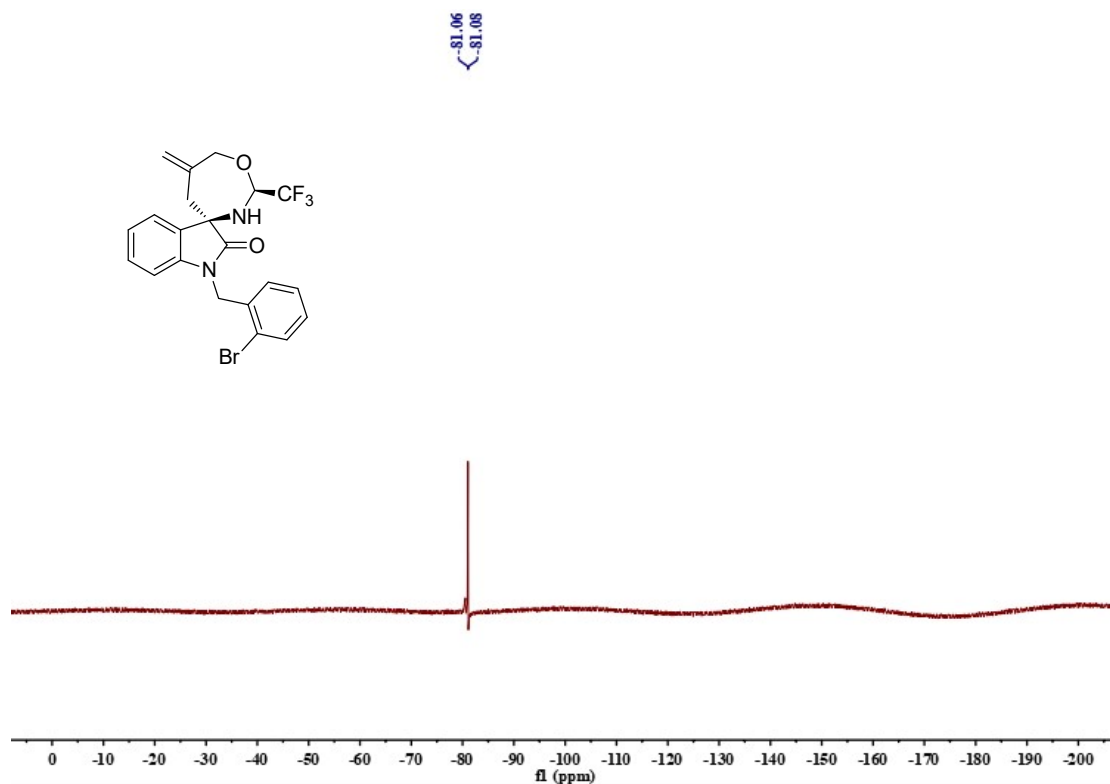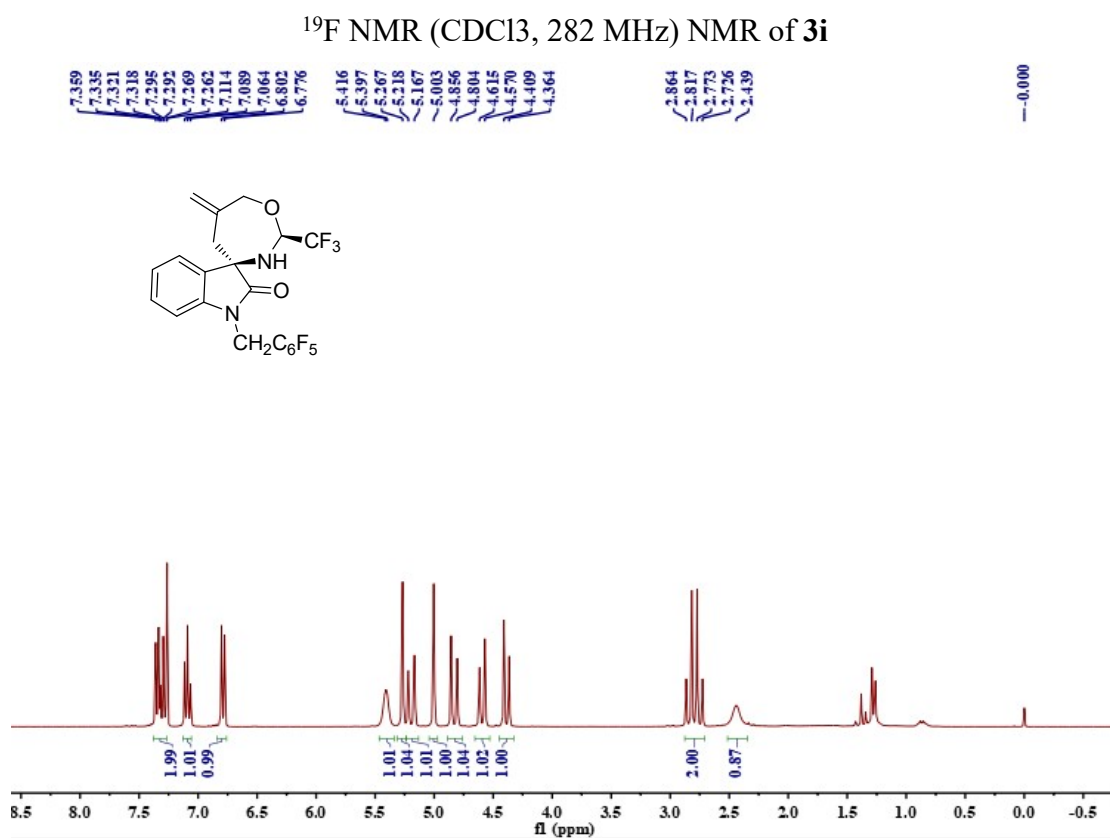

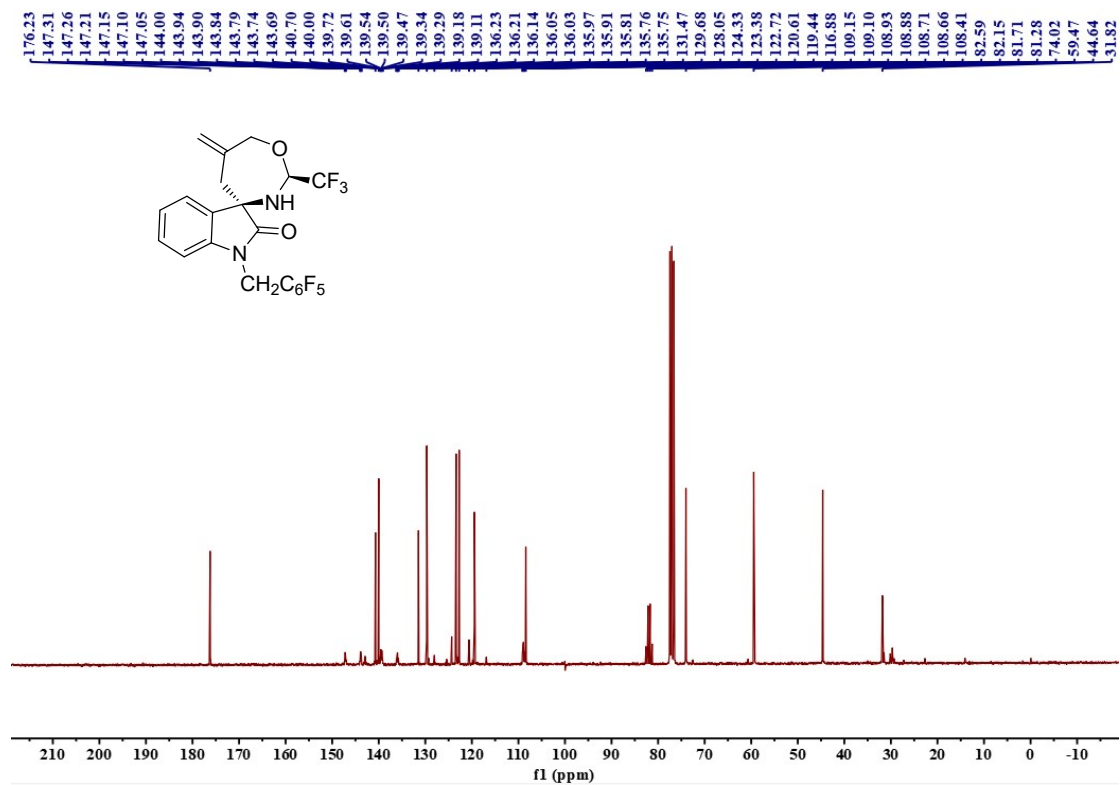

<sup>13</sup>C NMR (CDCl<sub>3</sub>, 75 MHz) NMR of **3j**

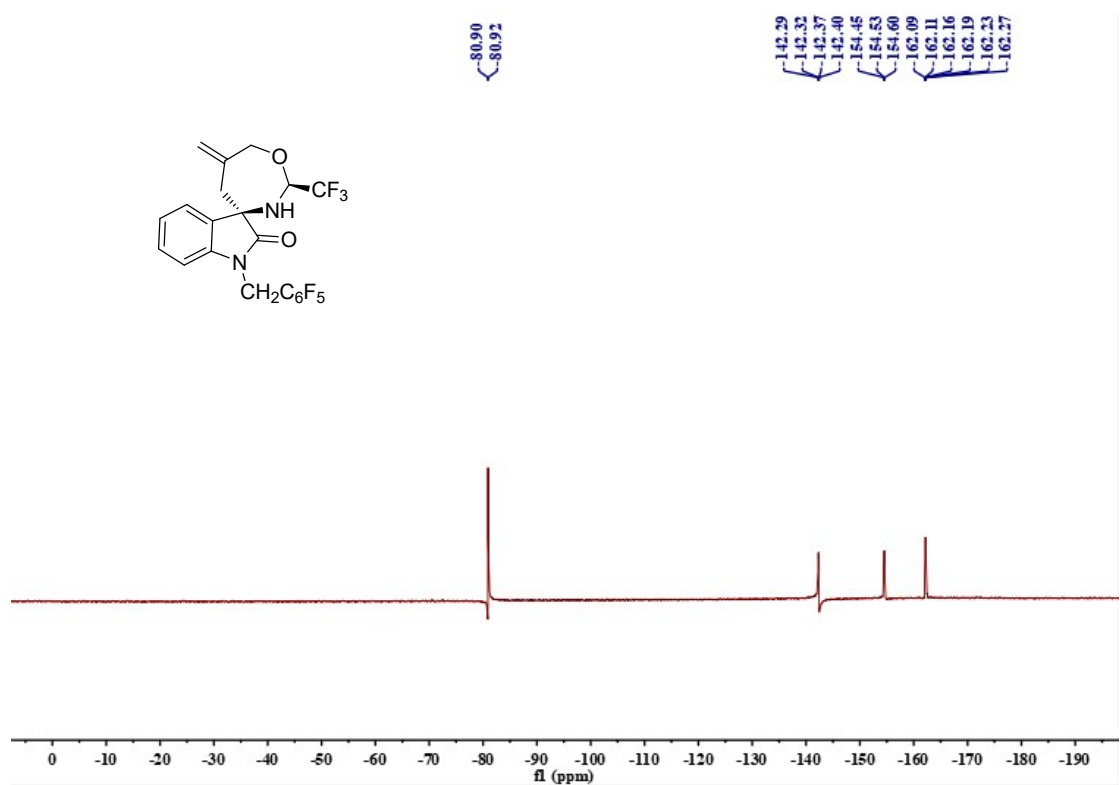

<sup>19</sup>F NMR (CDCl<sub>3</sub>, 282 MHz) NMR of **3j**

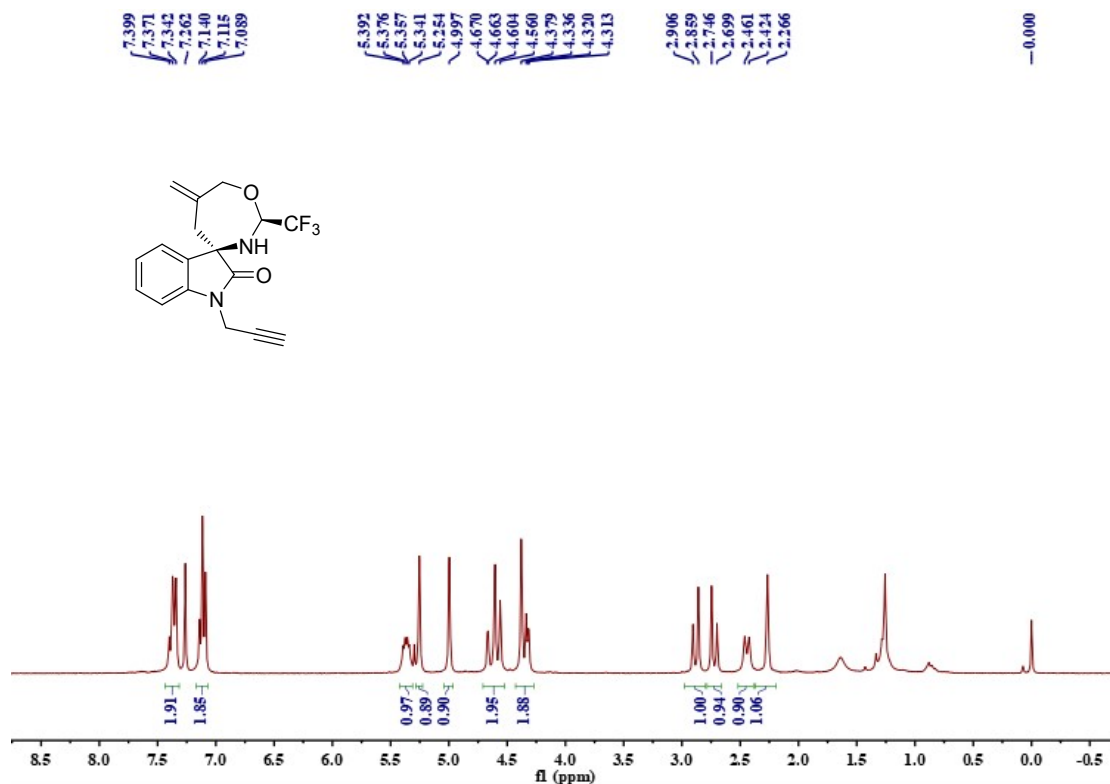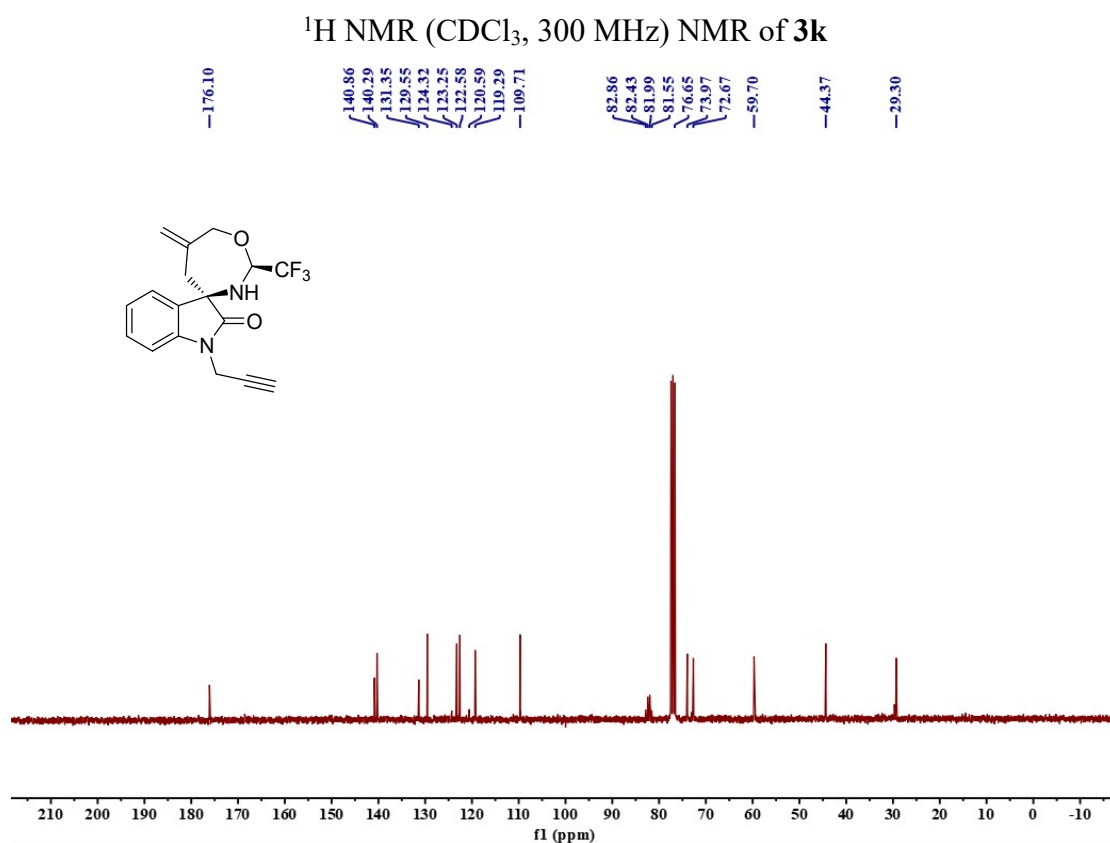



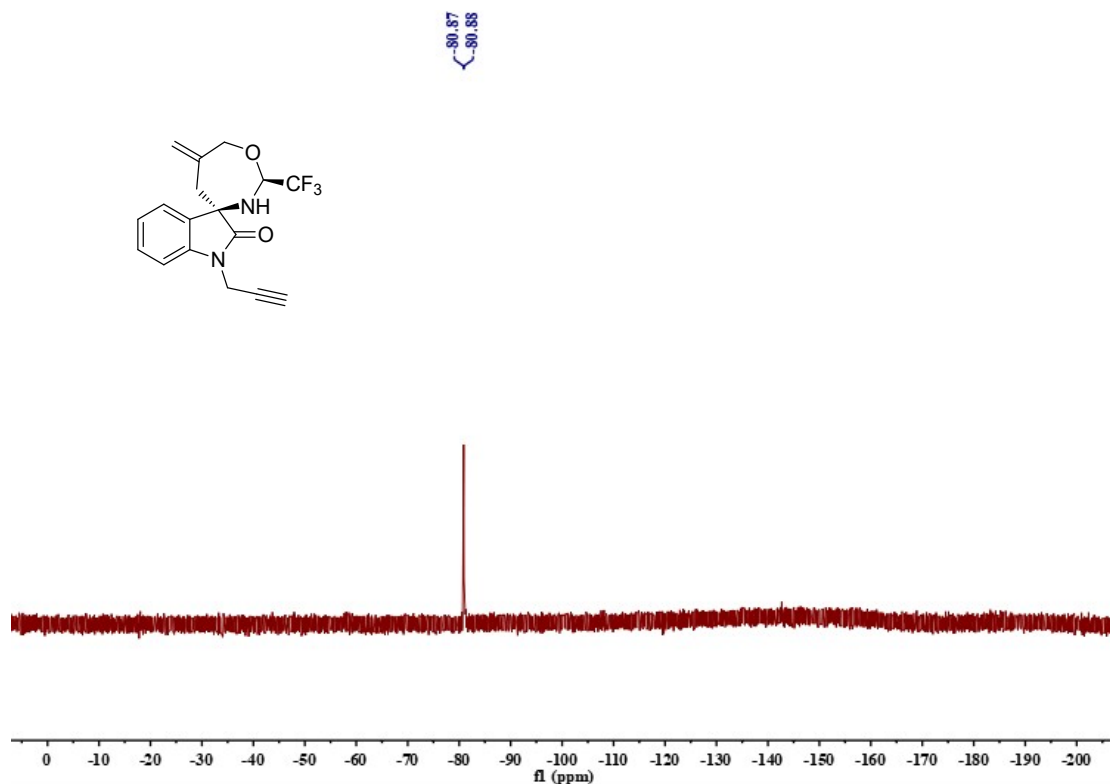

<sup>19</sup>F NMR (CDCl<sub>3</sub>, 282 MHz) NMR of **3k**

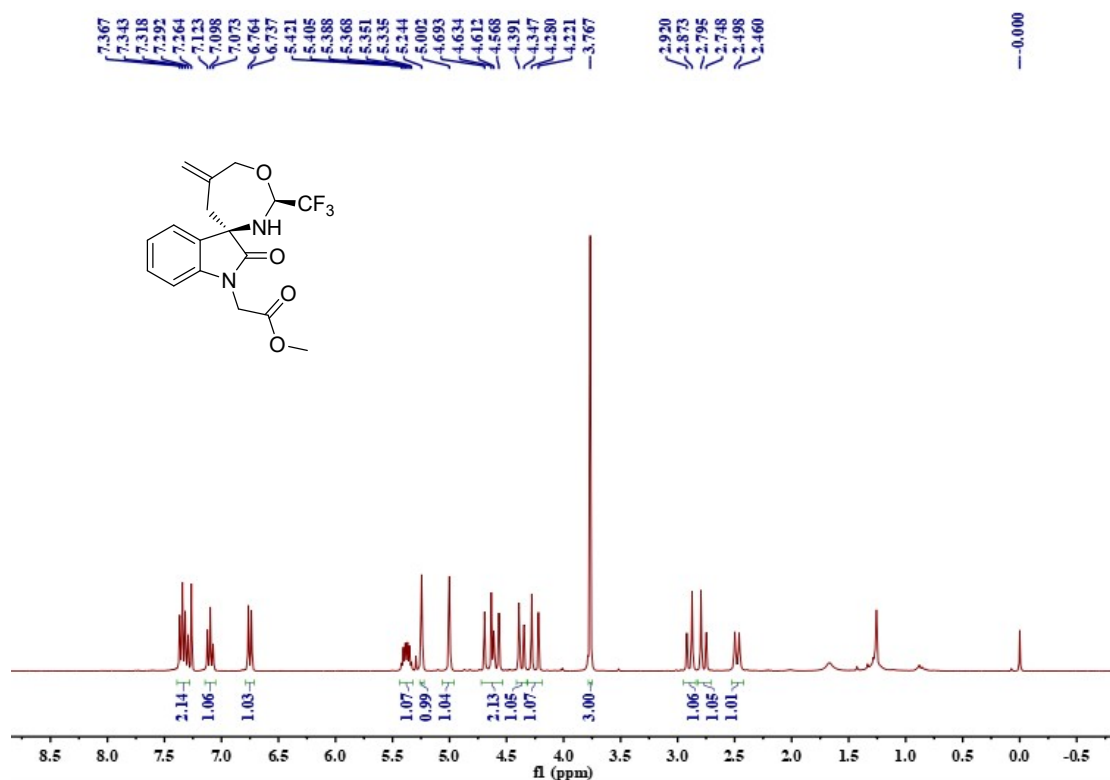

<sup>1</sup>H NMR (CDCl<sub>3</sub>, 300 MHz) NMR of **3l**

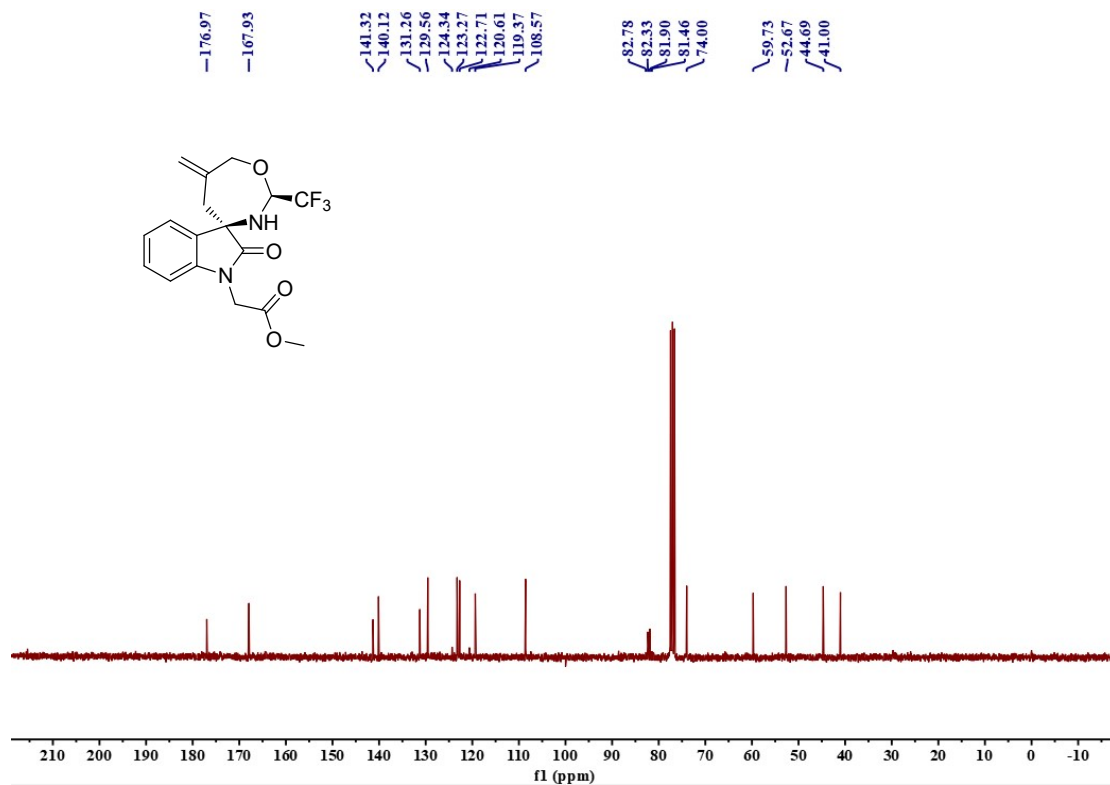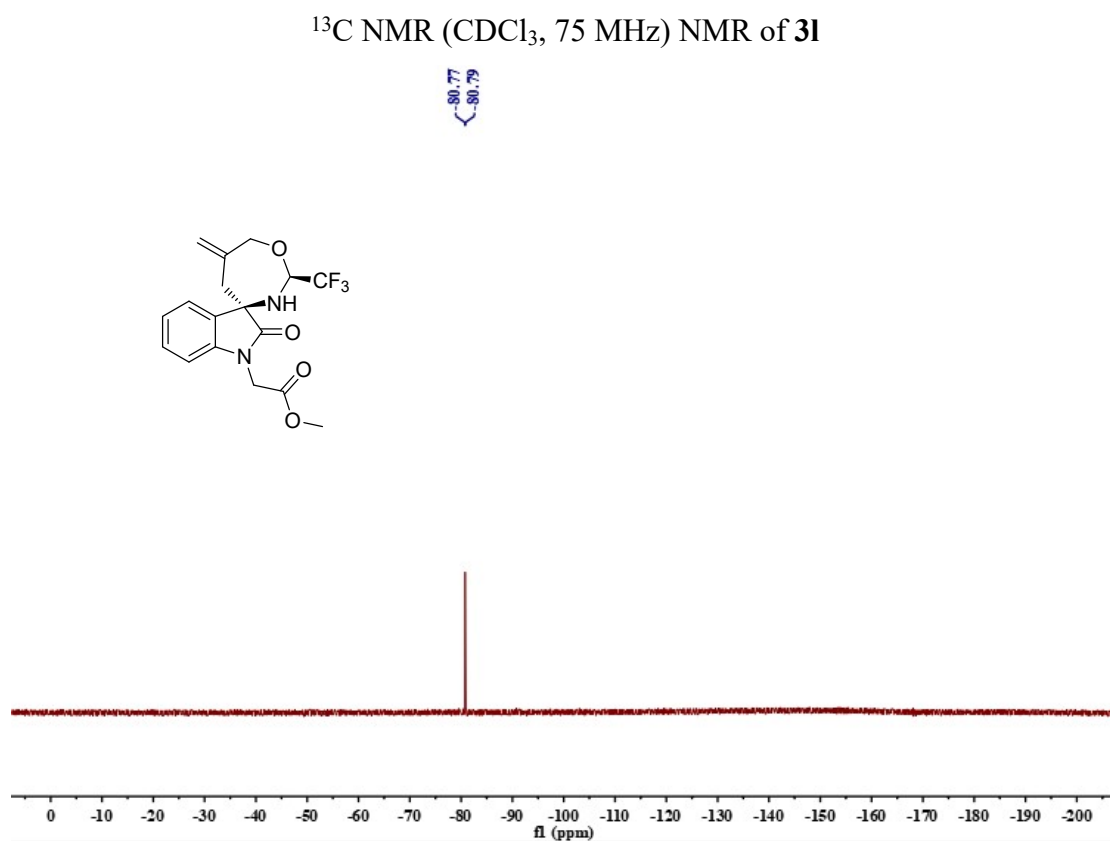

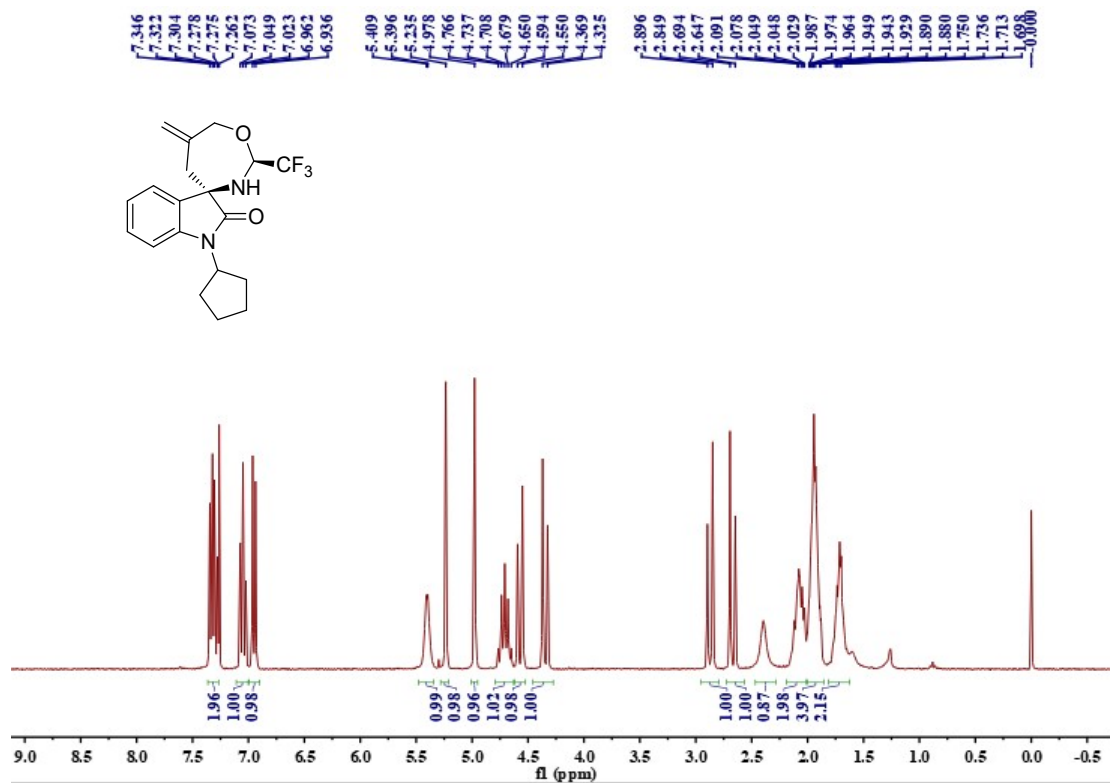

<sup>1</sup>H NMR (CDCl<sub>3</sub>, 300 MHz) NMR of **3m**

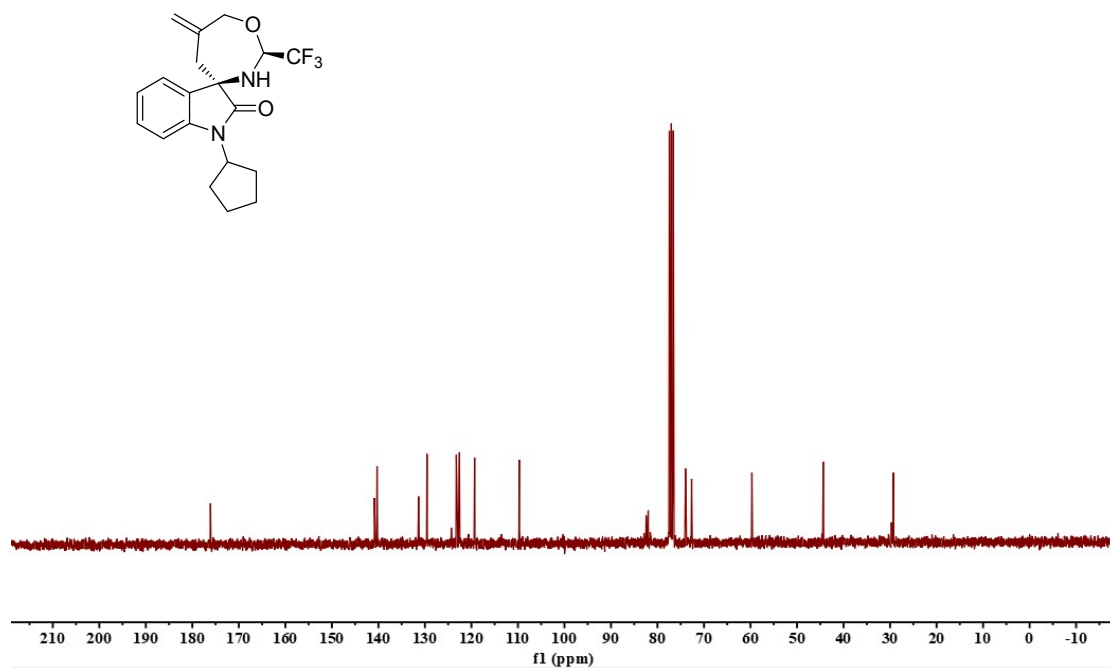

<sup>13</sup>C NMR (CDCl<sub>3</sub>, 75 MHz) NMR of **3m**

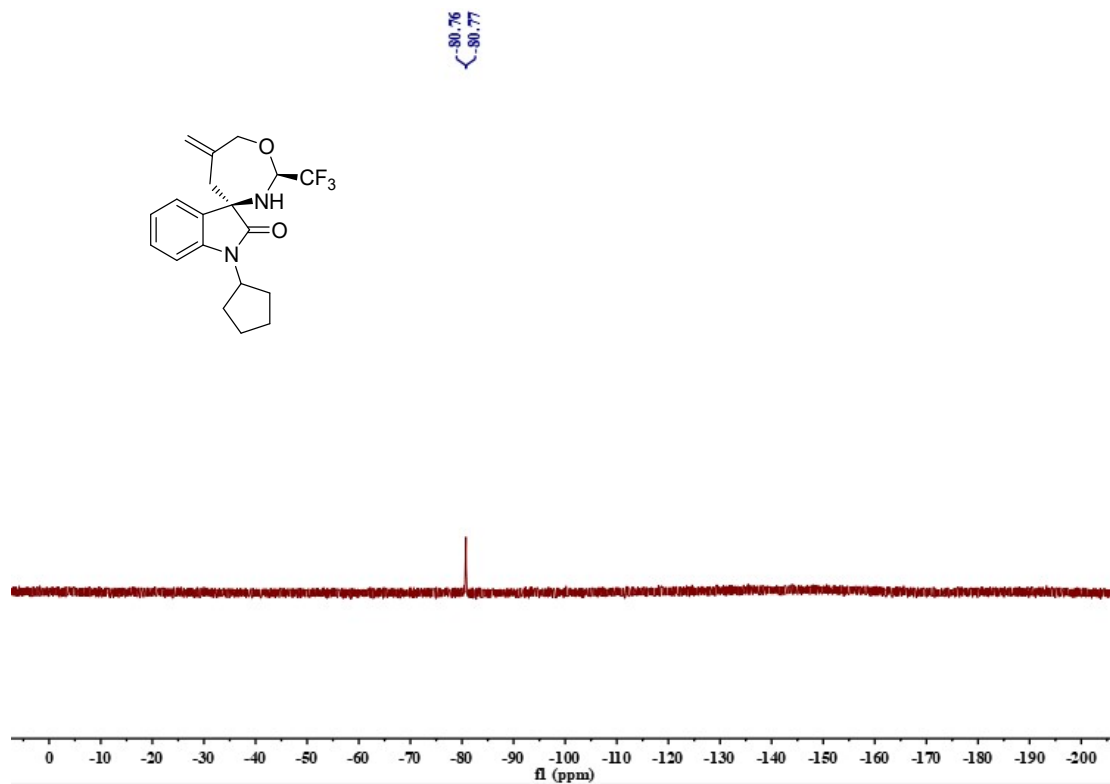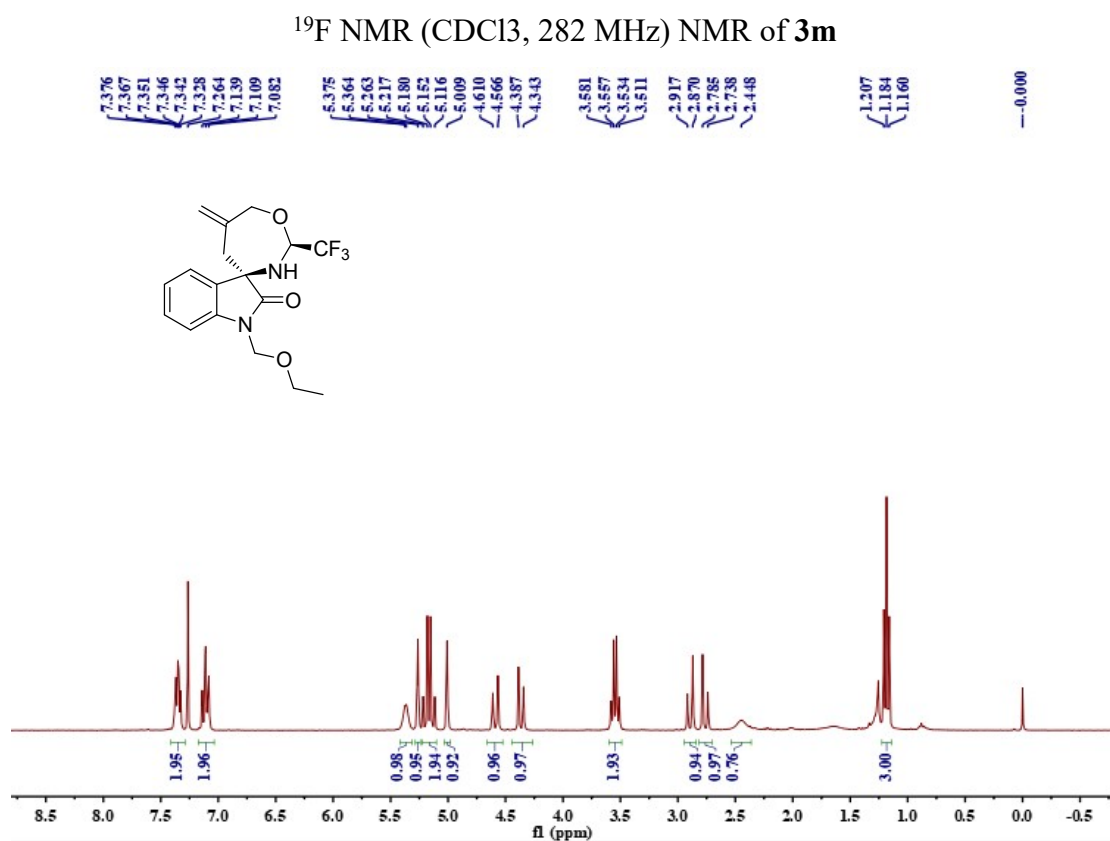

$^1\text{H}$  NMR (CDCl<sub>3</sub>, 300 MHz) NMR of **3n**

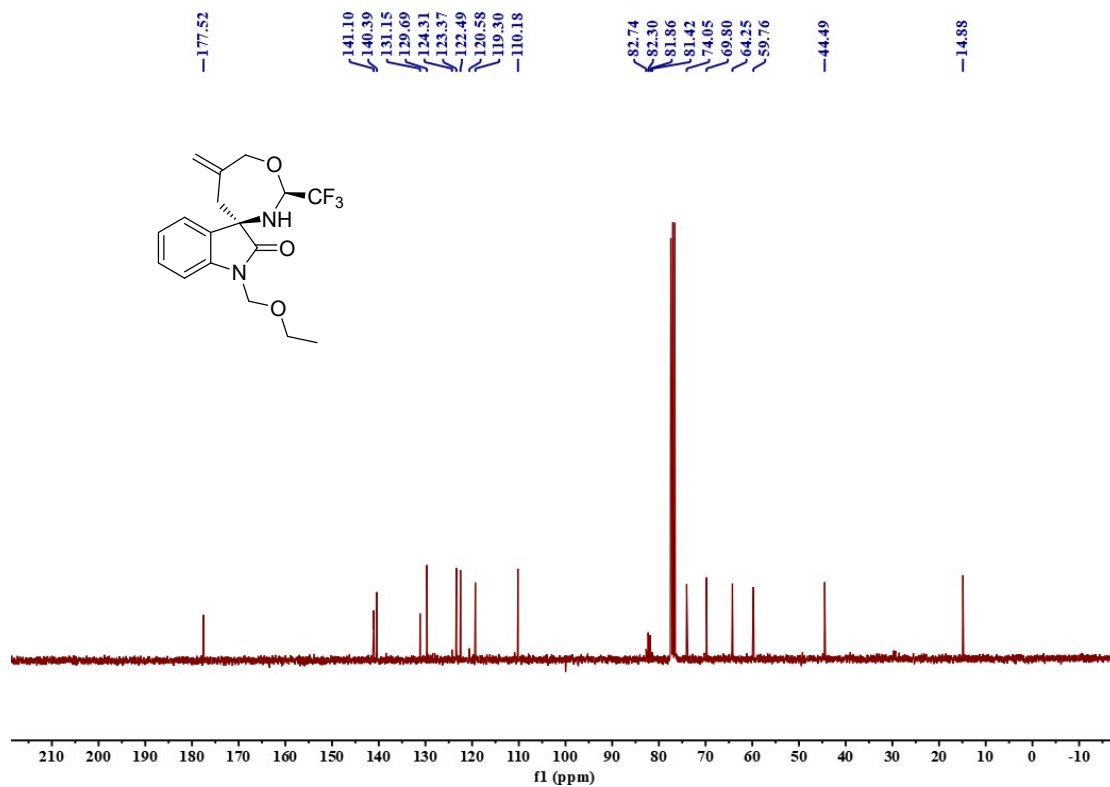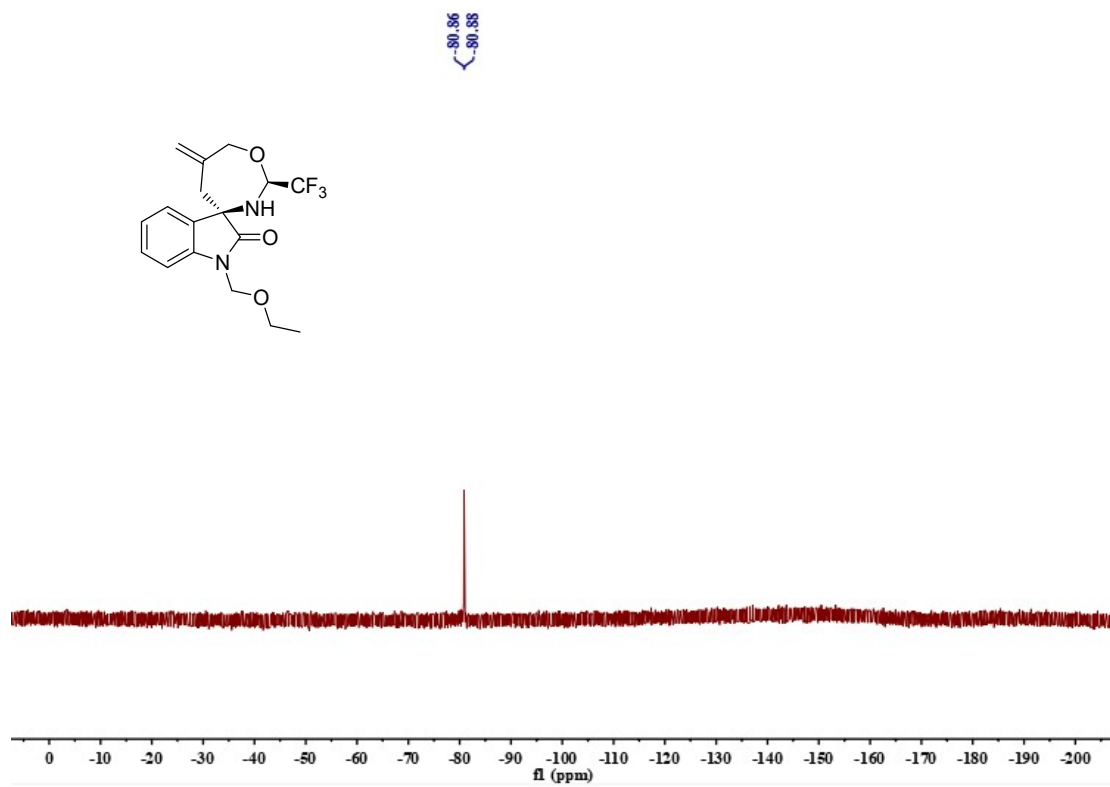

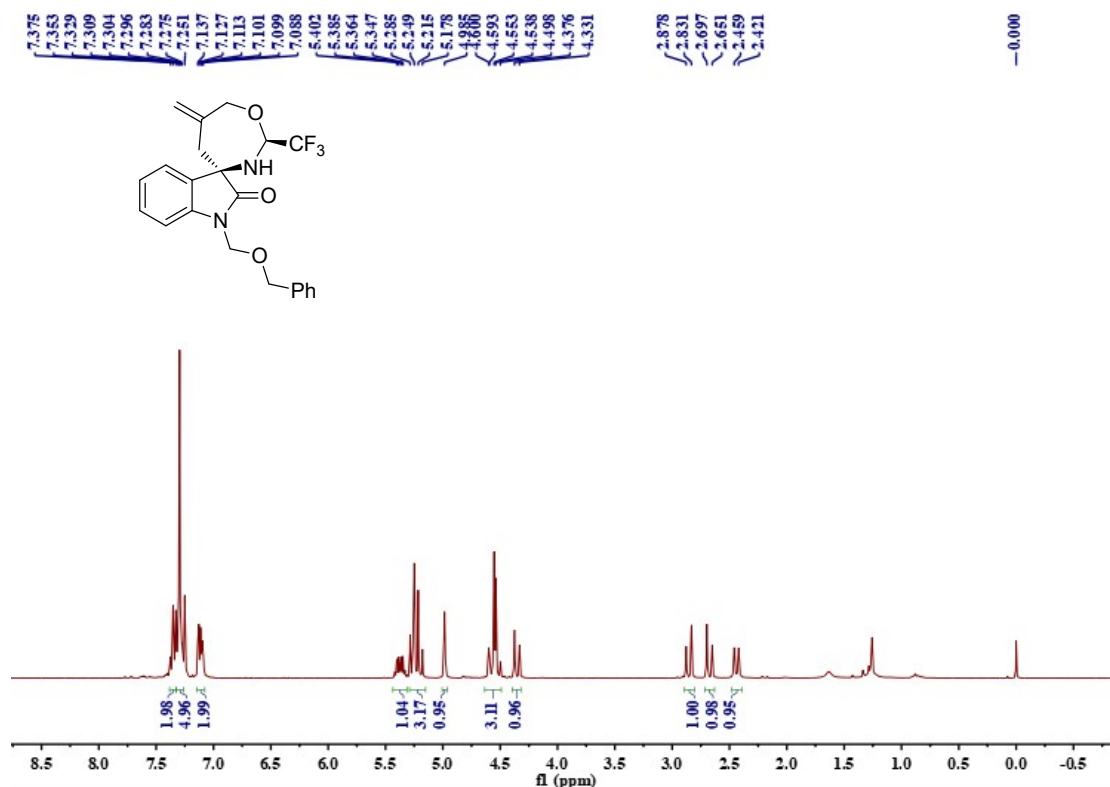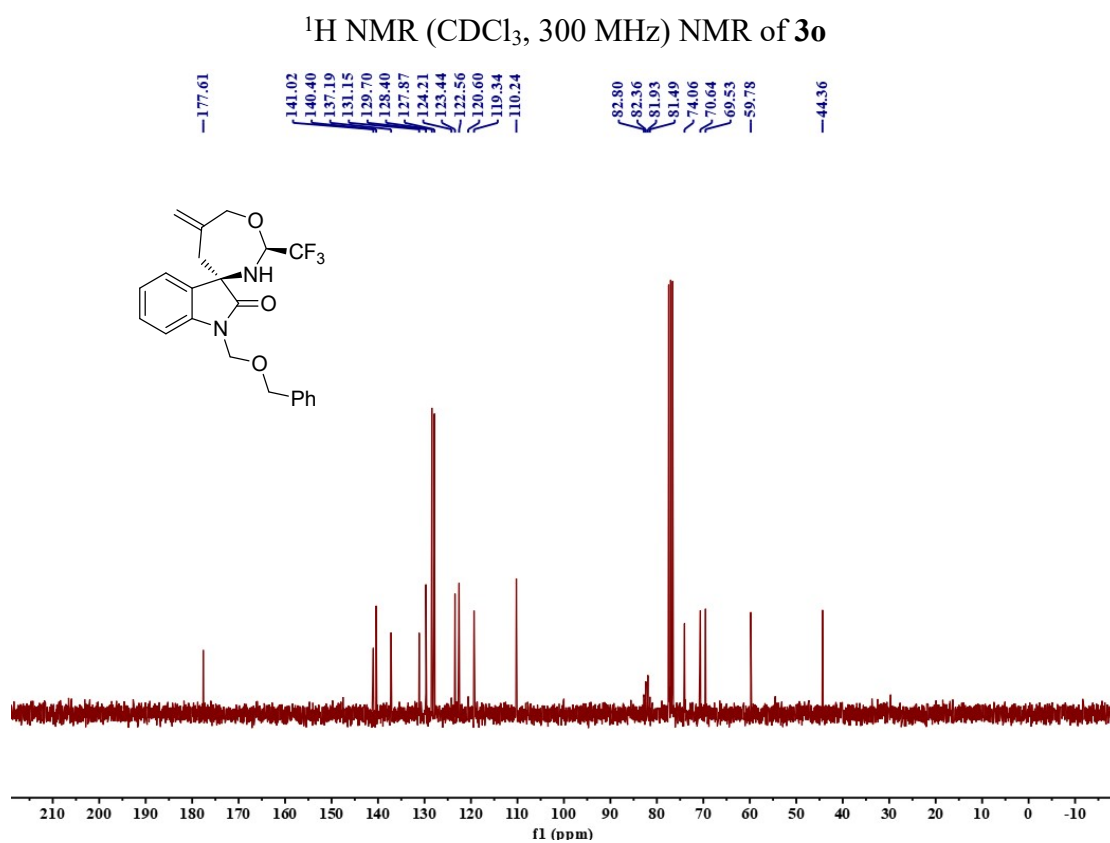

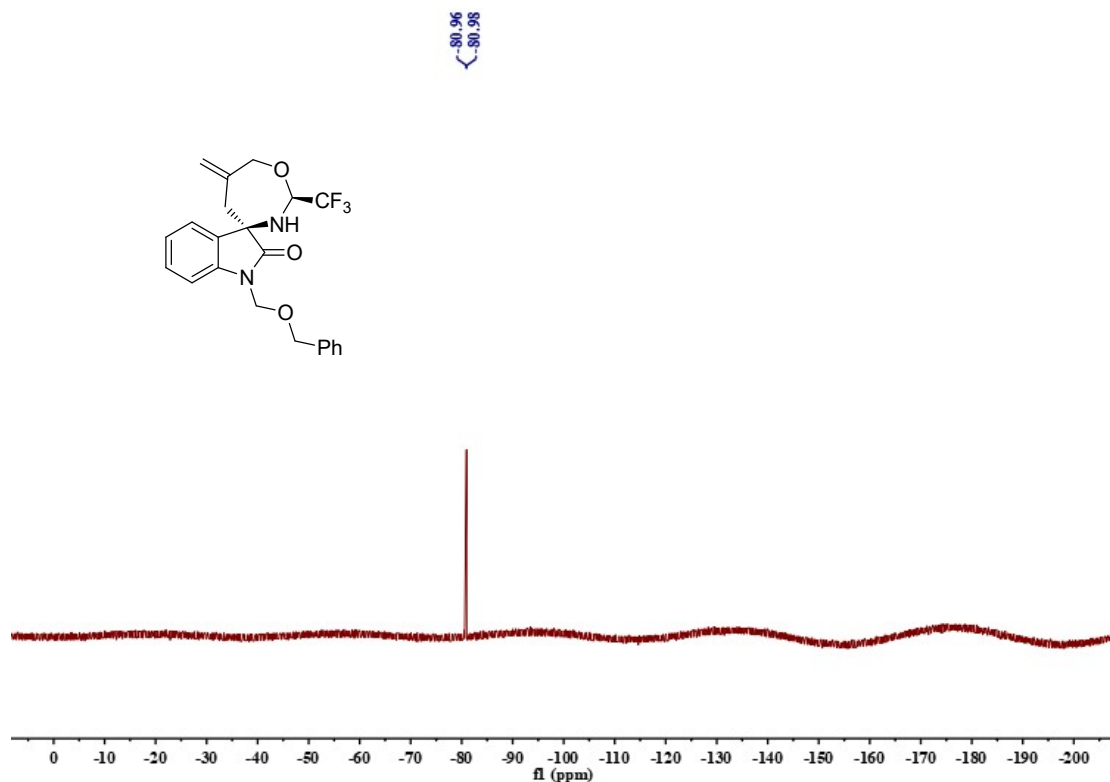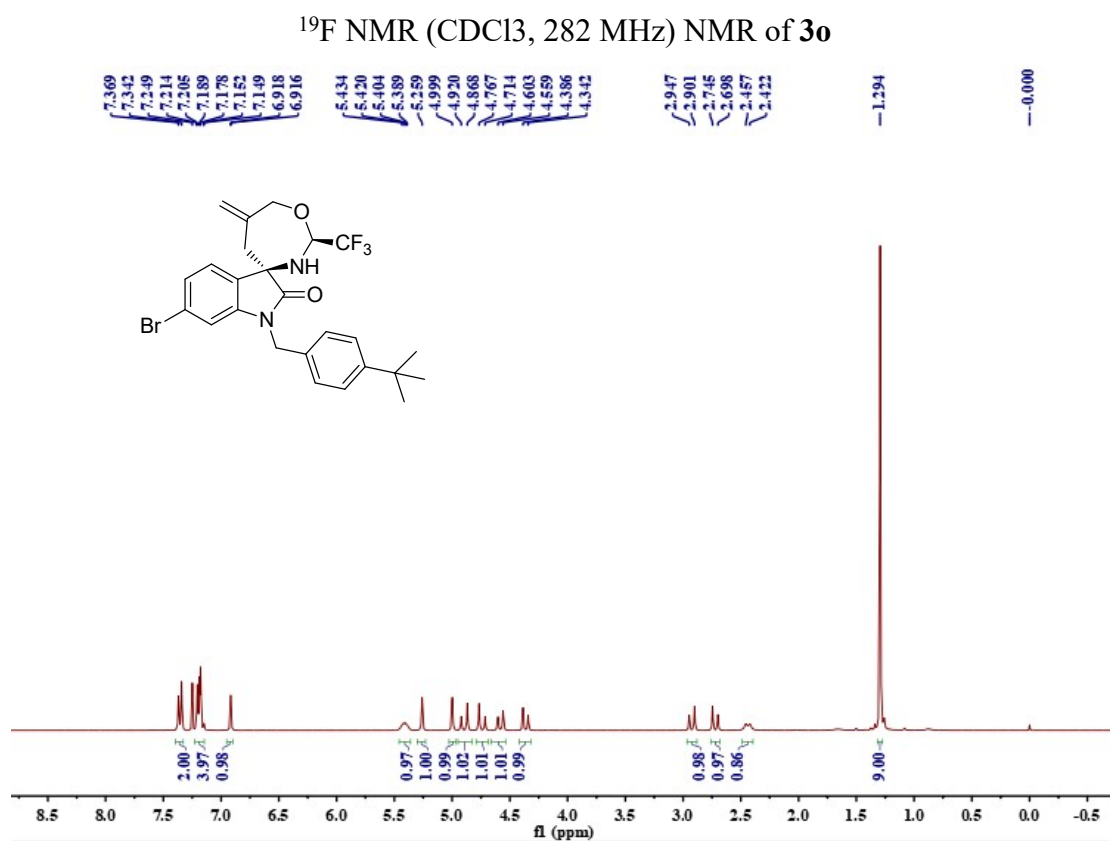

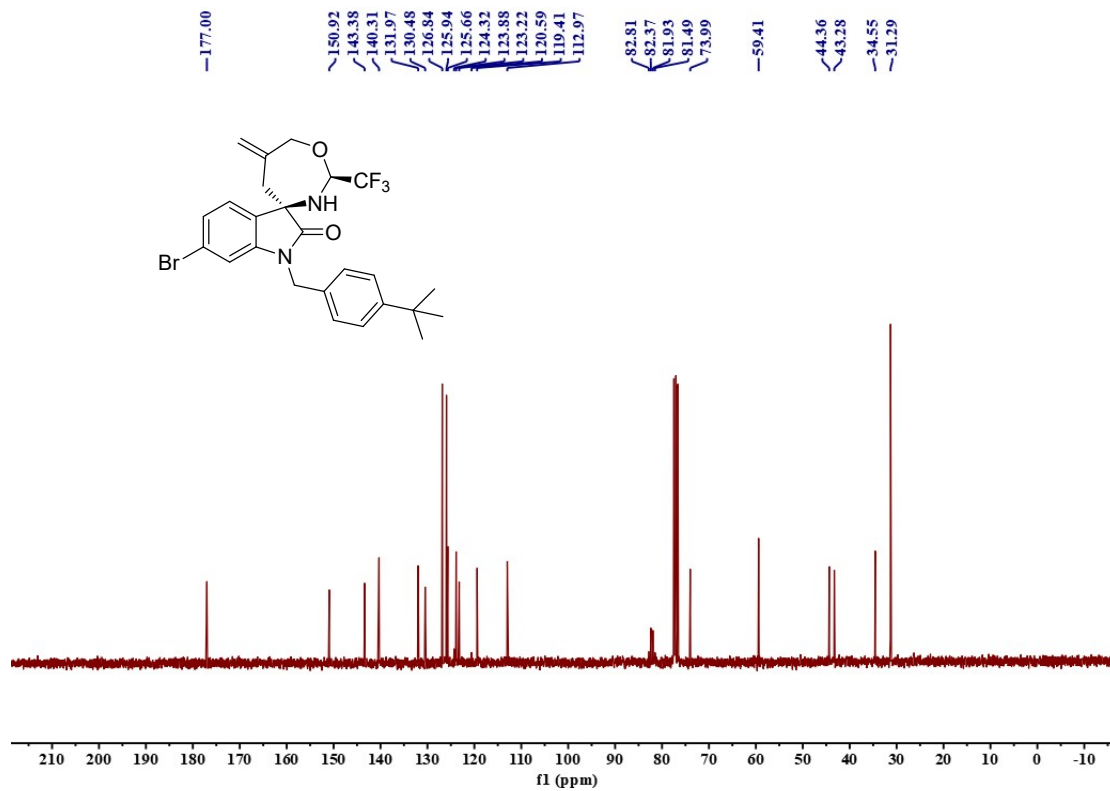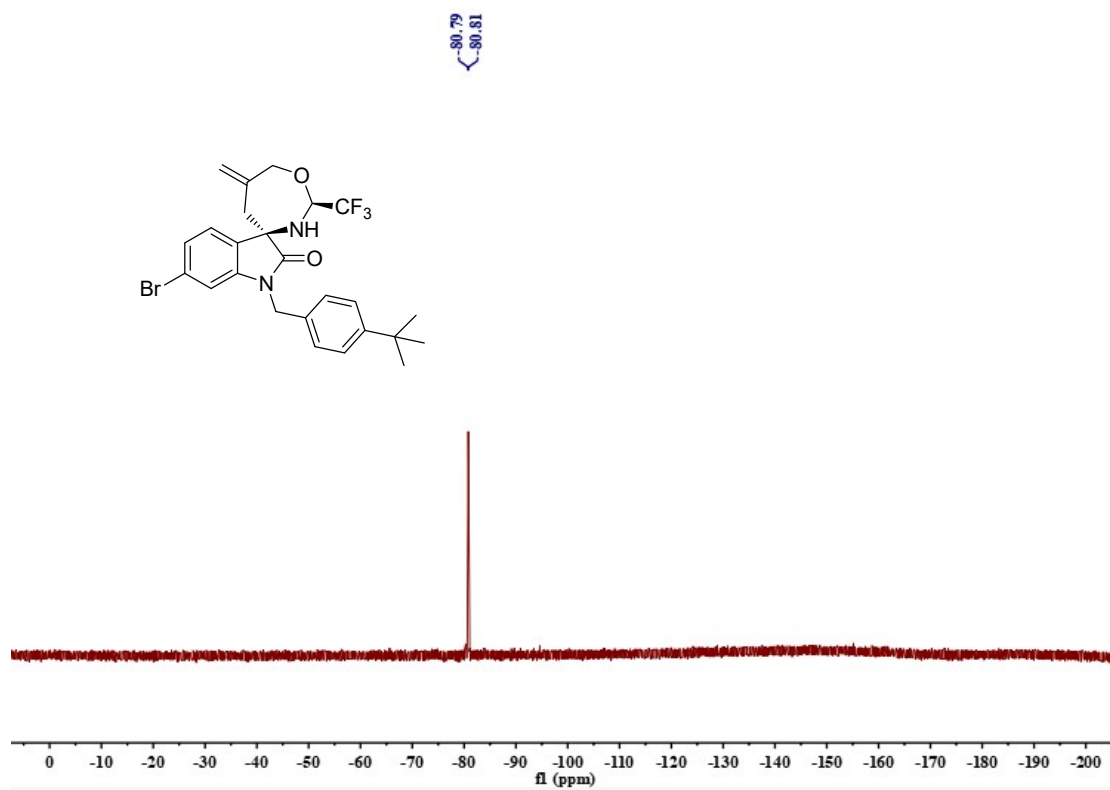



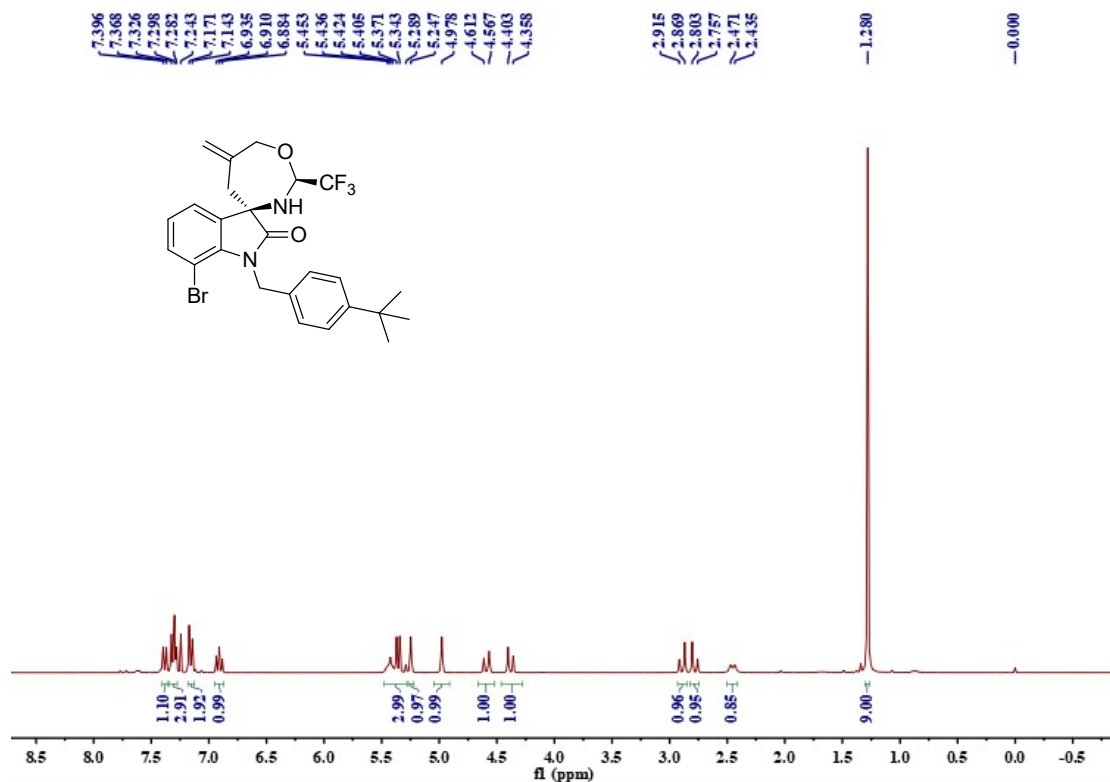

**<sup>1</sup>H NMR (CDCl<sub>3</sub>, 300 MHz) NMR of 3q**

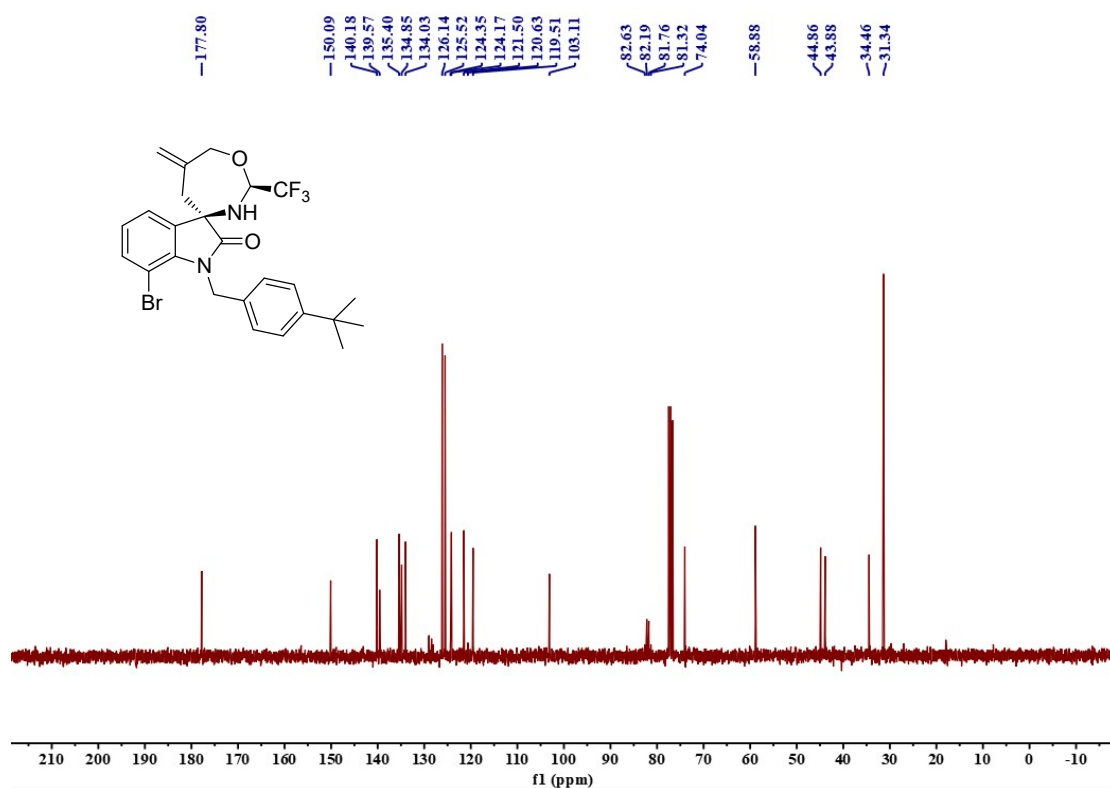

**<sup>13</sup>C NMR (CDCl<sub>3</sub>, 75 MHz) NMR of 3q**

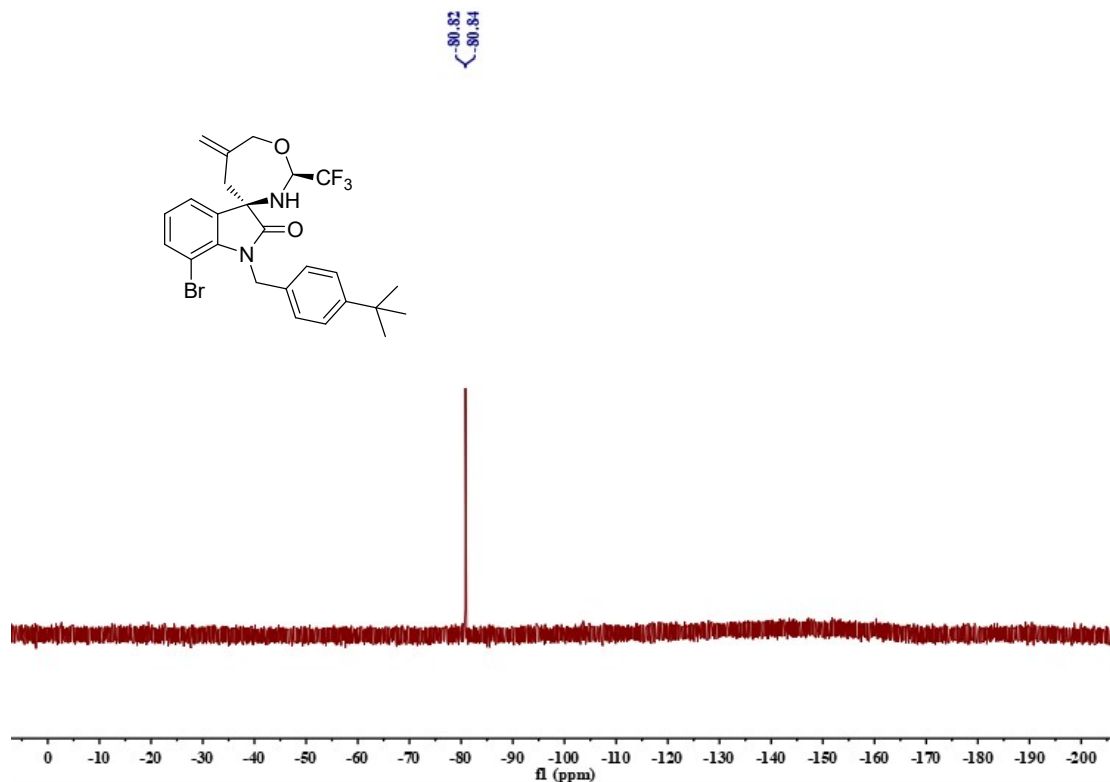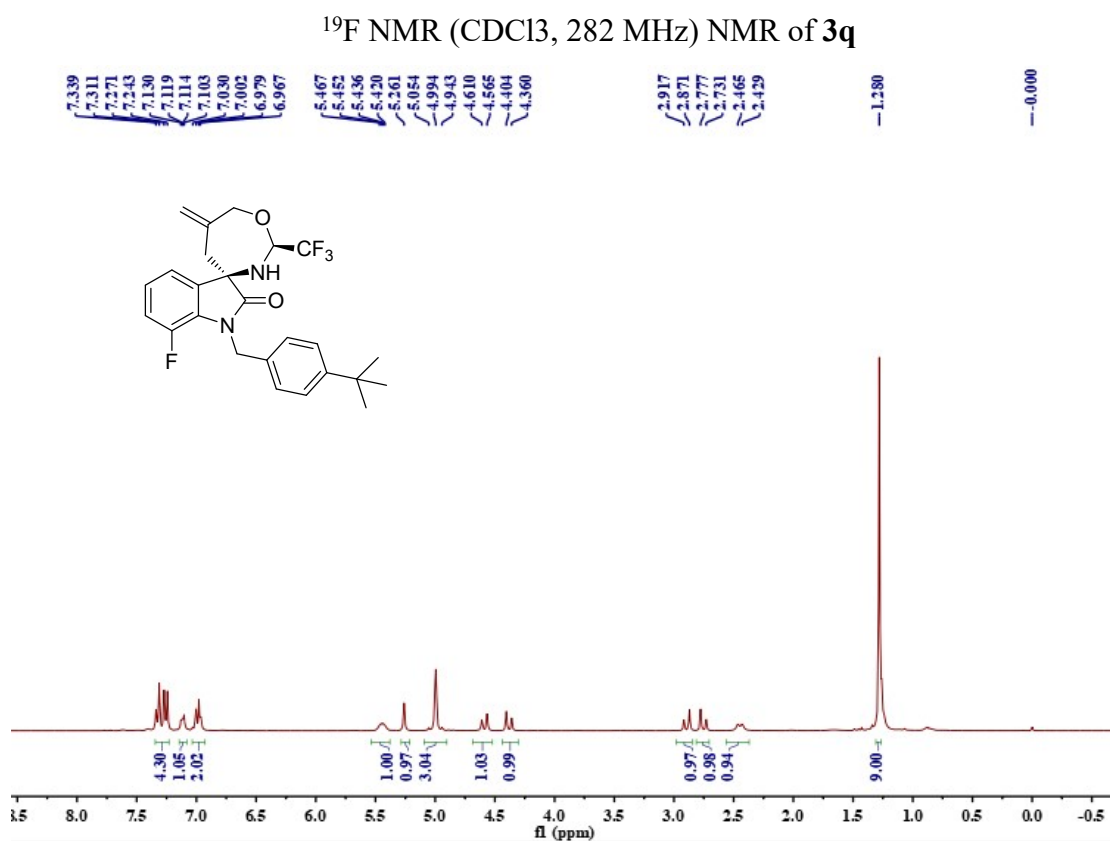

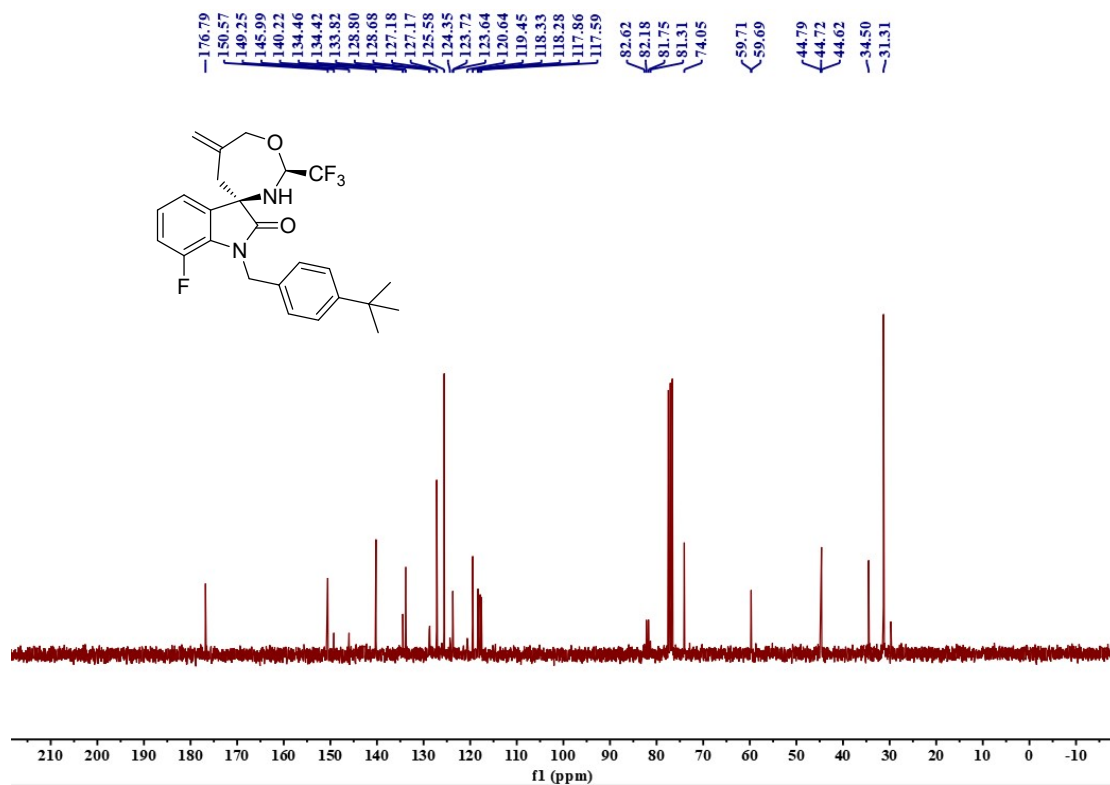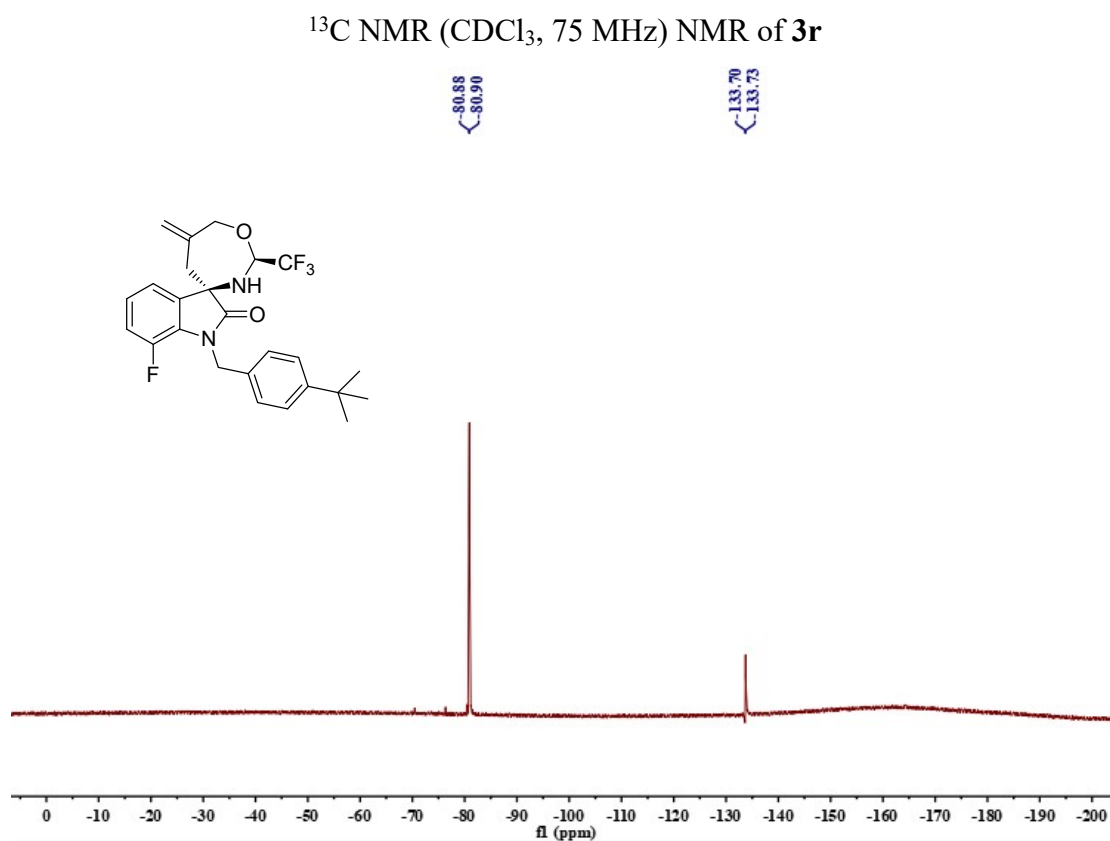

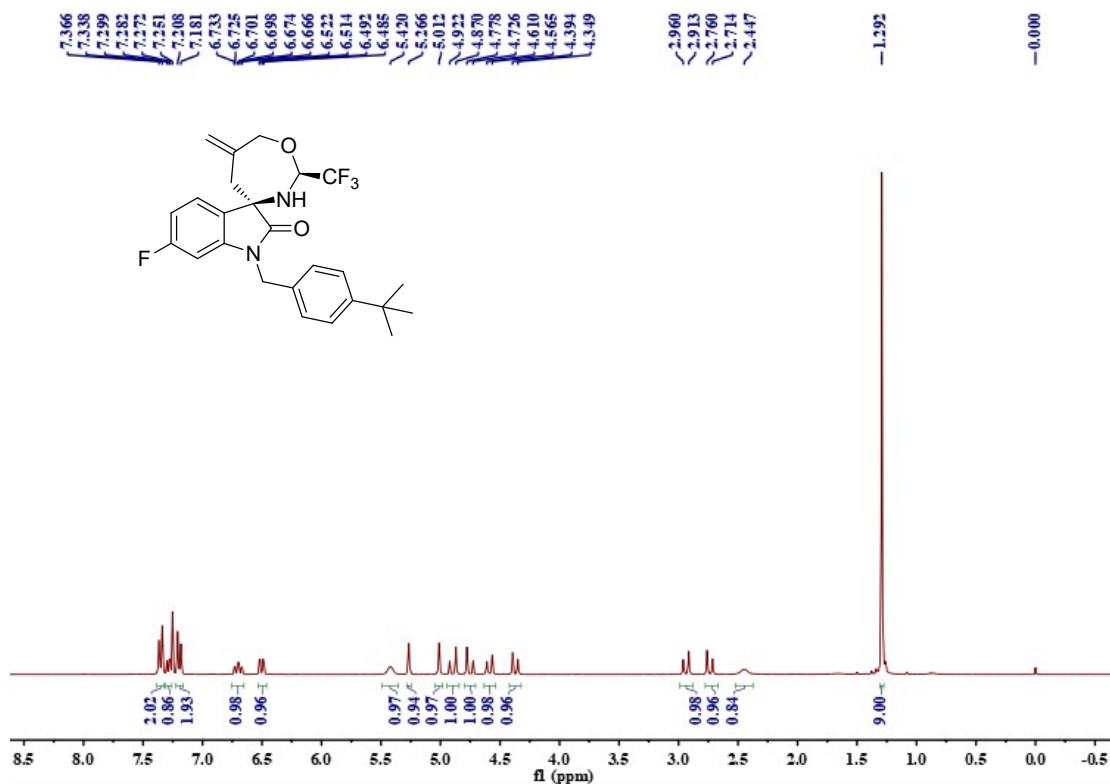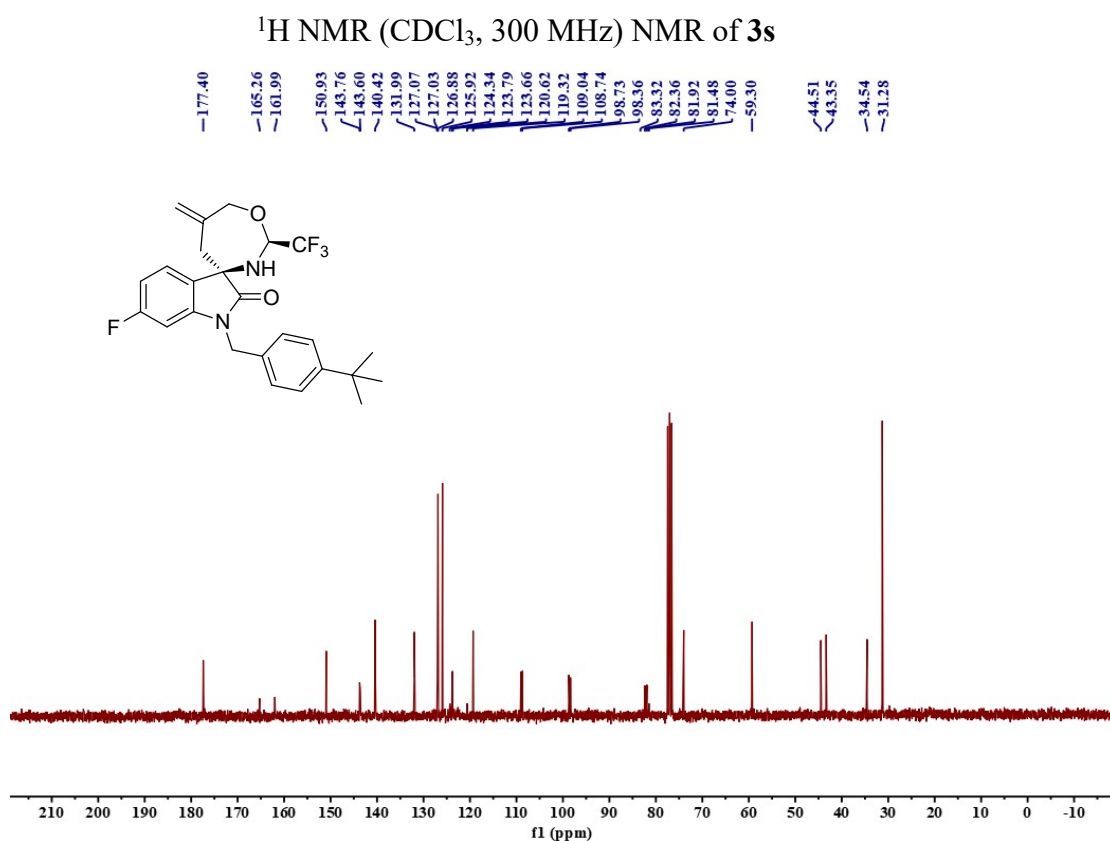

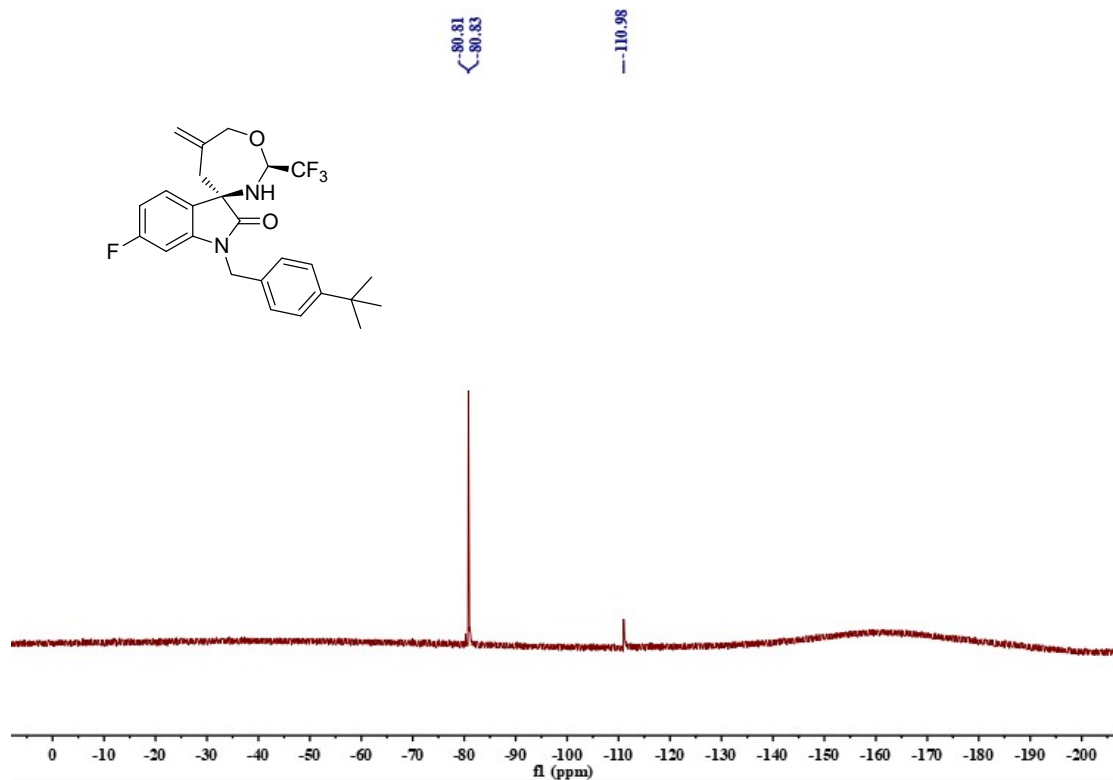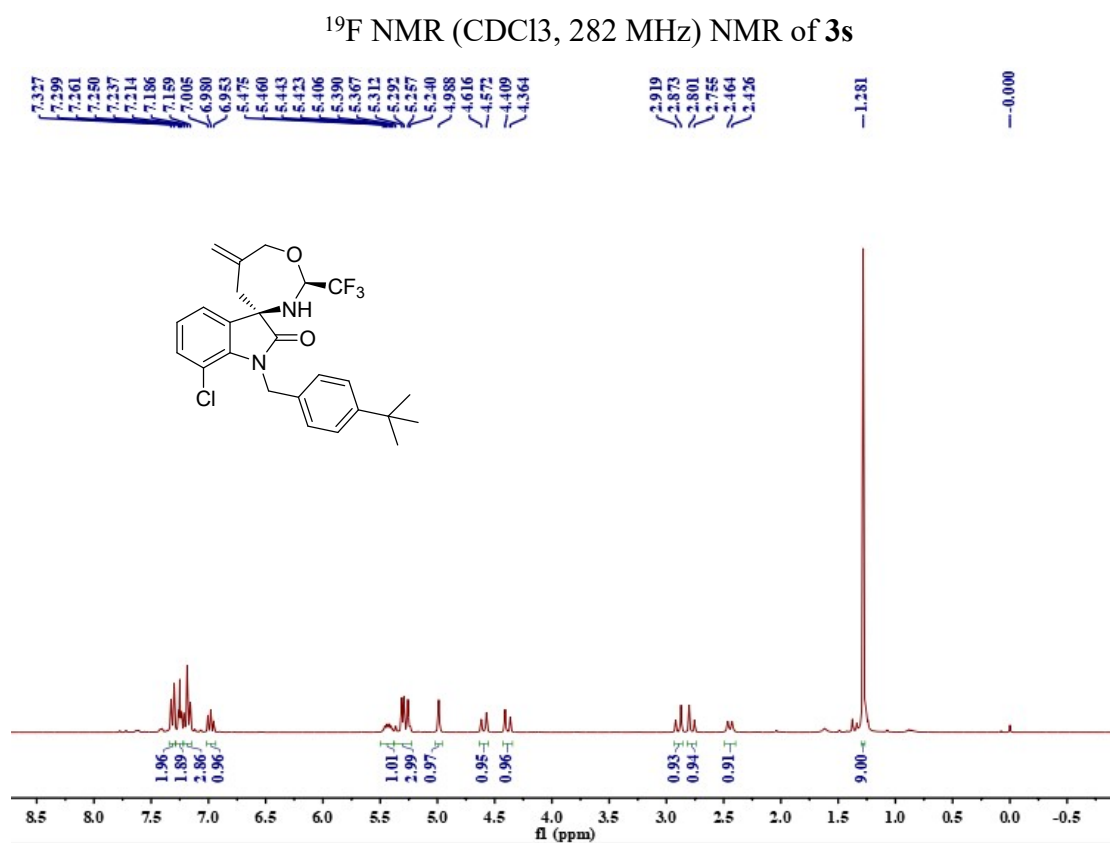

$^1\text{H}$  NMR (CDCl<sub>3</sub>, 300 MHz) NMR of **3t**

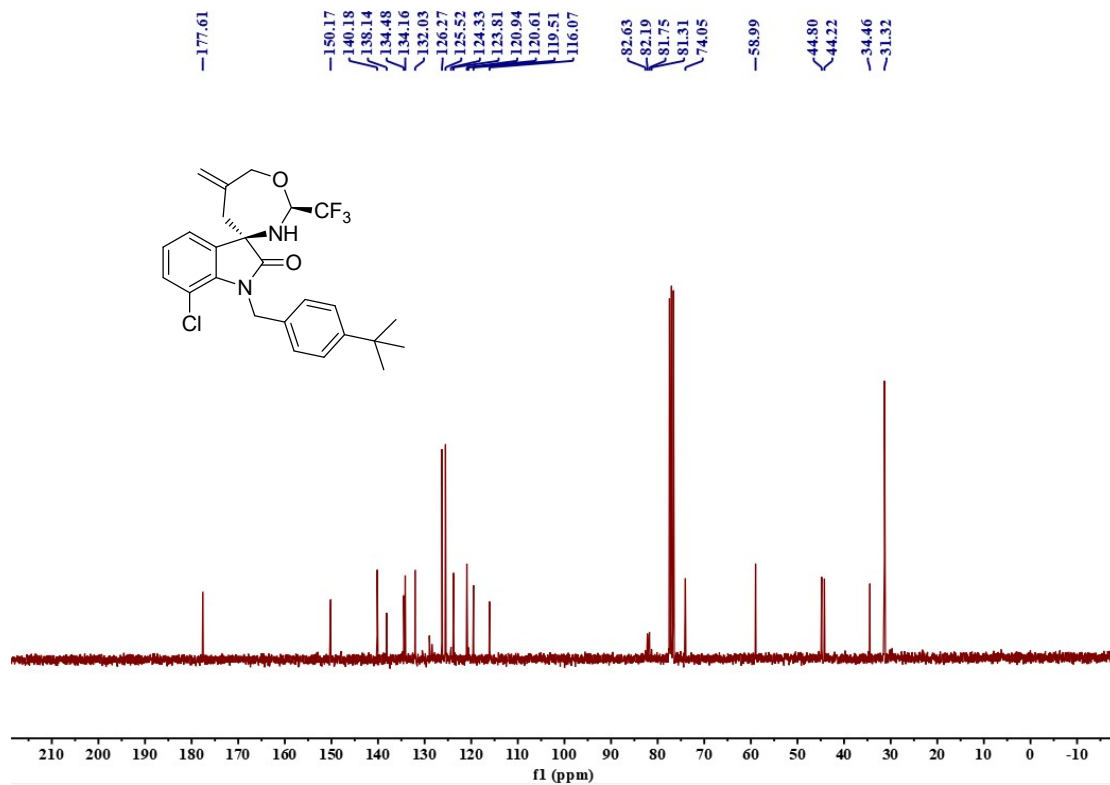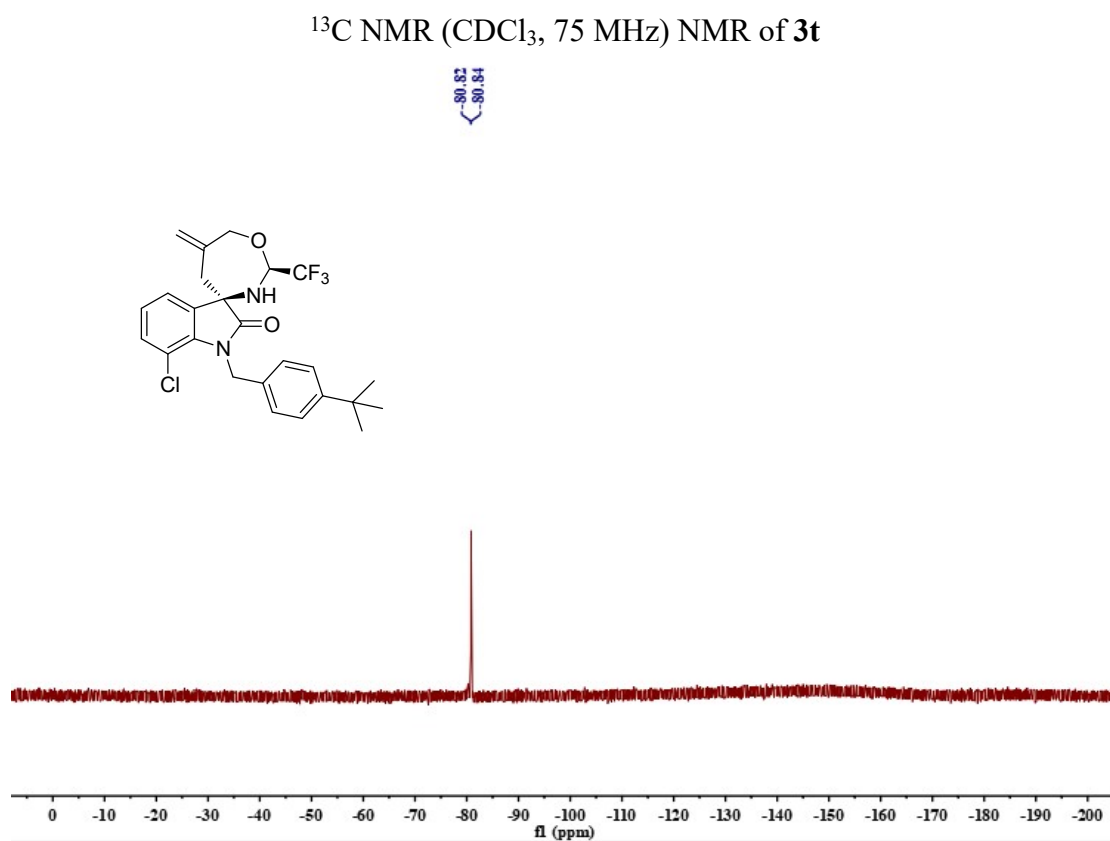

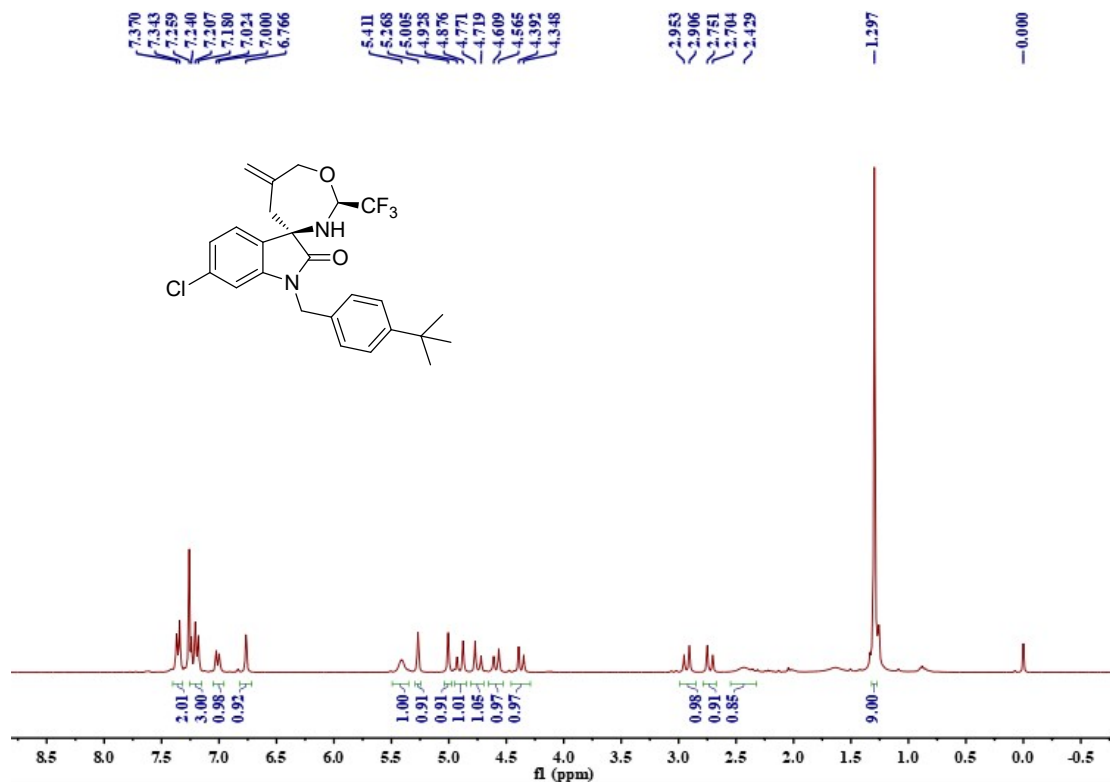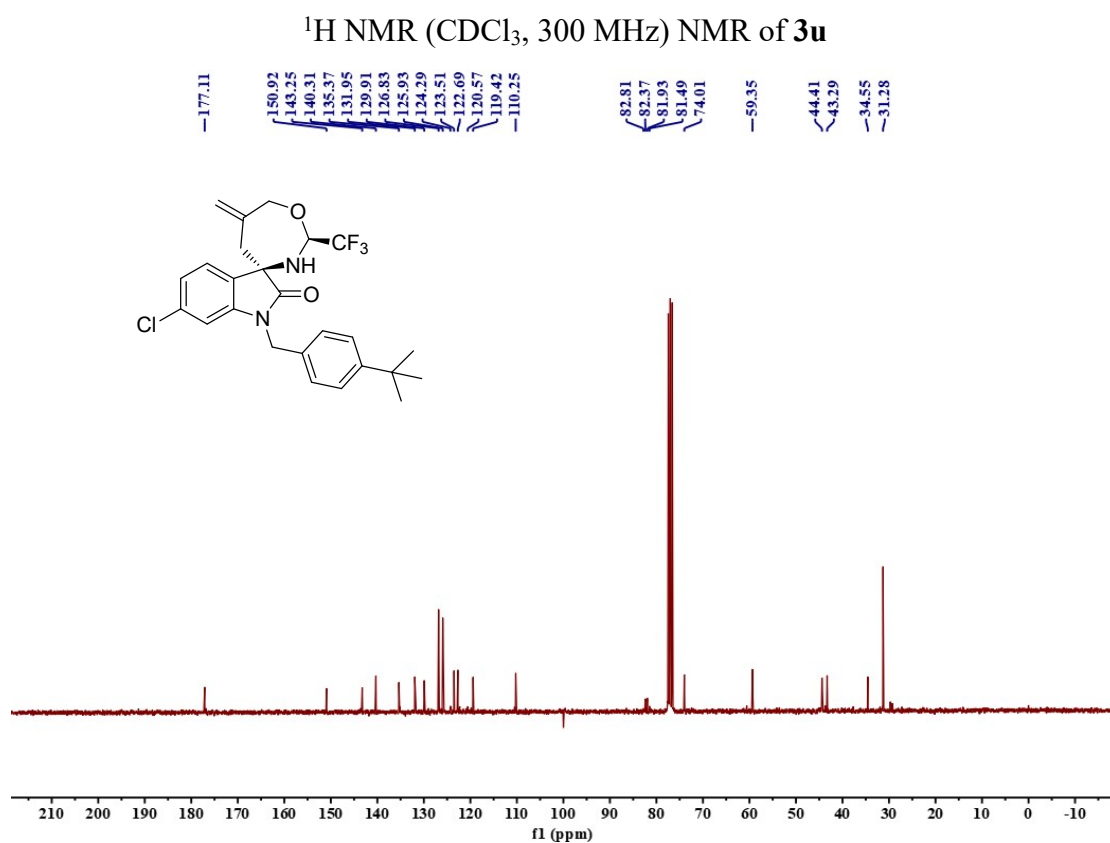

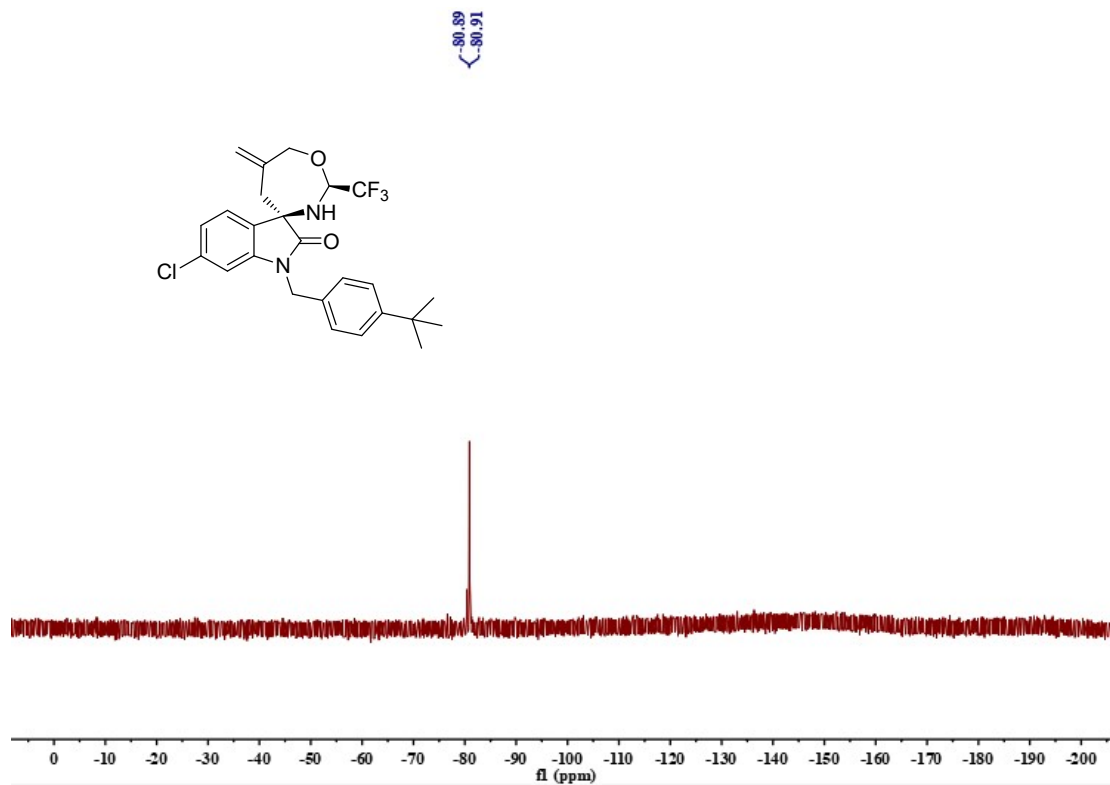

<sup>19</sup>F NMR (CDCl<sub>3</sub>, 282 MHz) NMR of **3u**

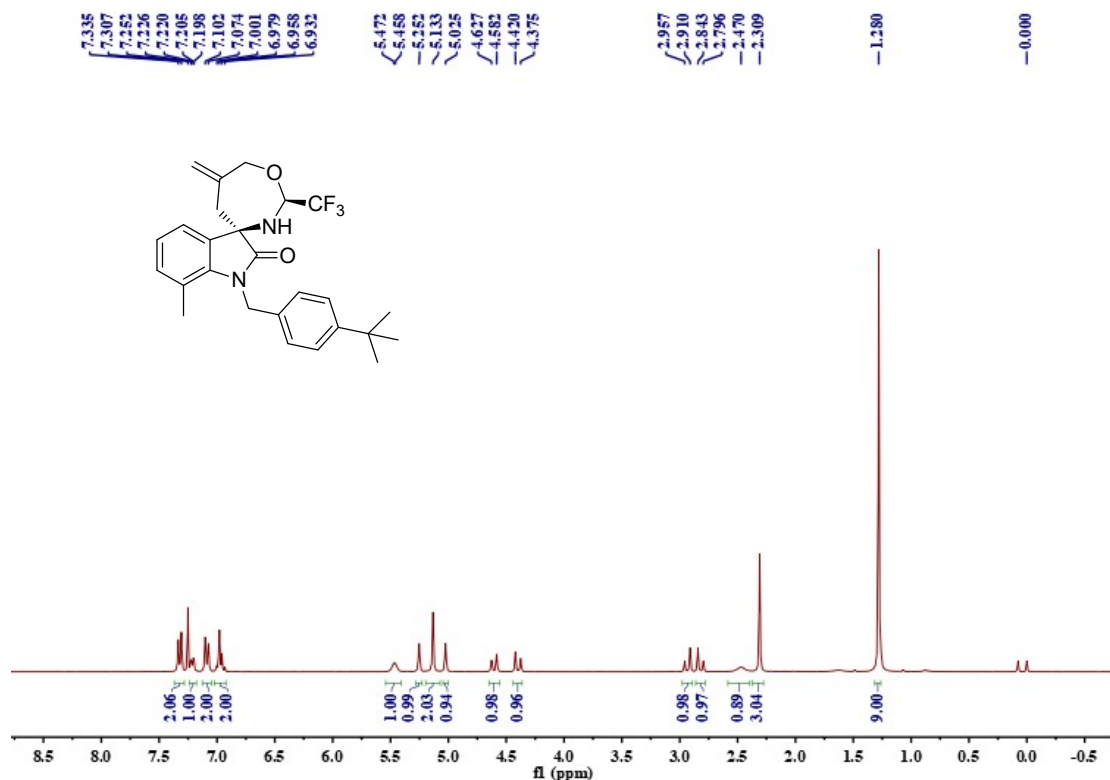

<sup>1</sup>H NMR (CDCl<sub>3</sub>, 300 MHz) NMR of **3v**



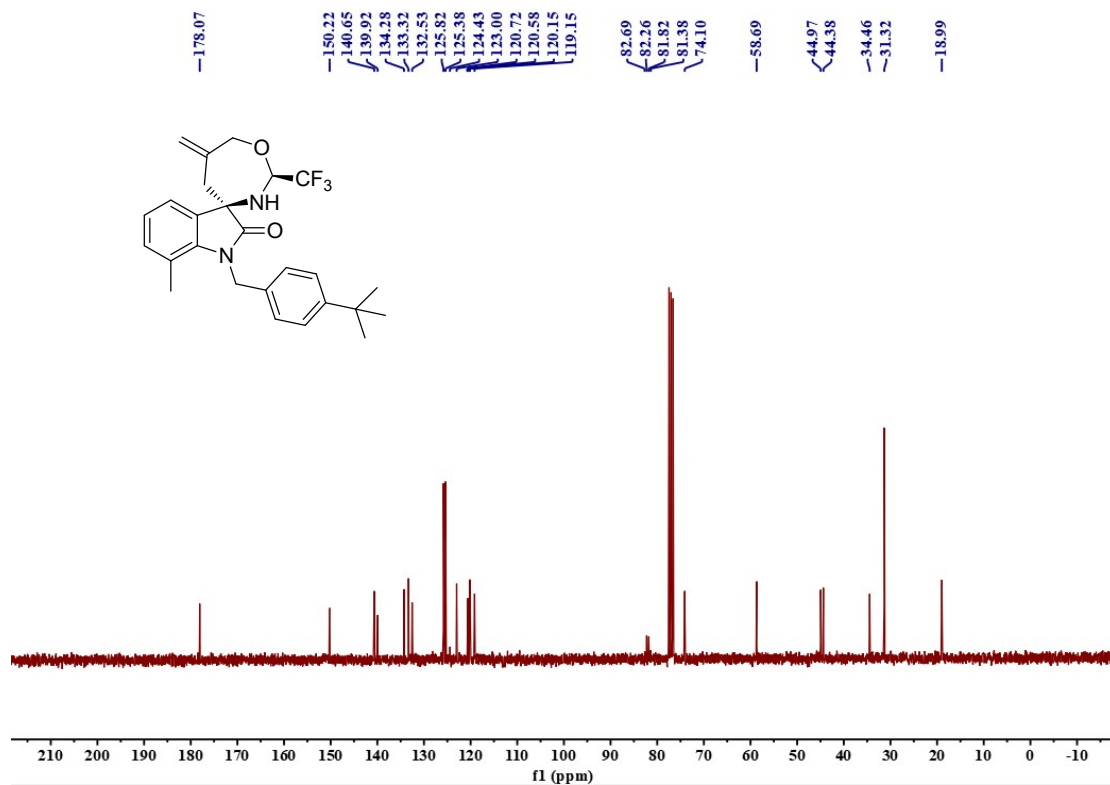

<sup>13</sup>C NMR (CDCl<sub>3</sub>, 75 MHz) NMR of **3v**

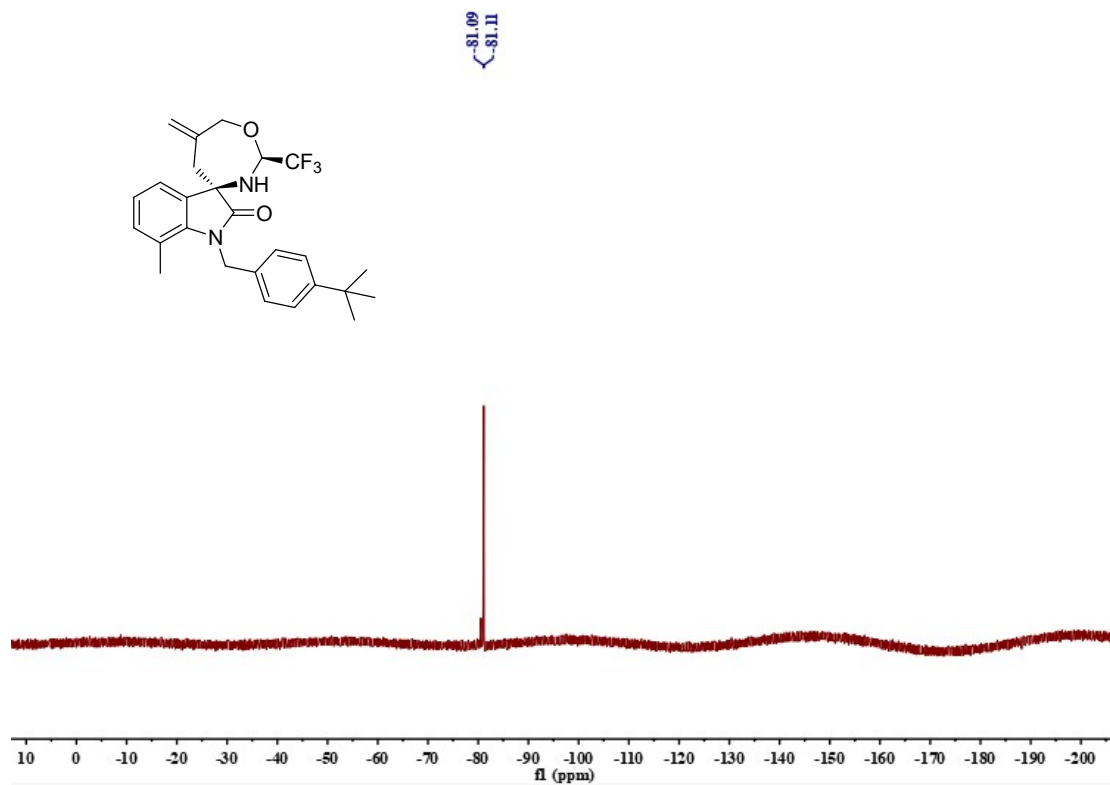

<sup>19</sup>F NMR (CDCl<sub>3</sub>, 282 MHz) NMR of **3v**

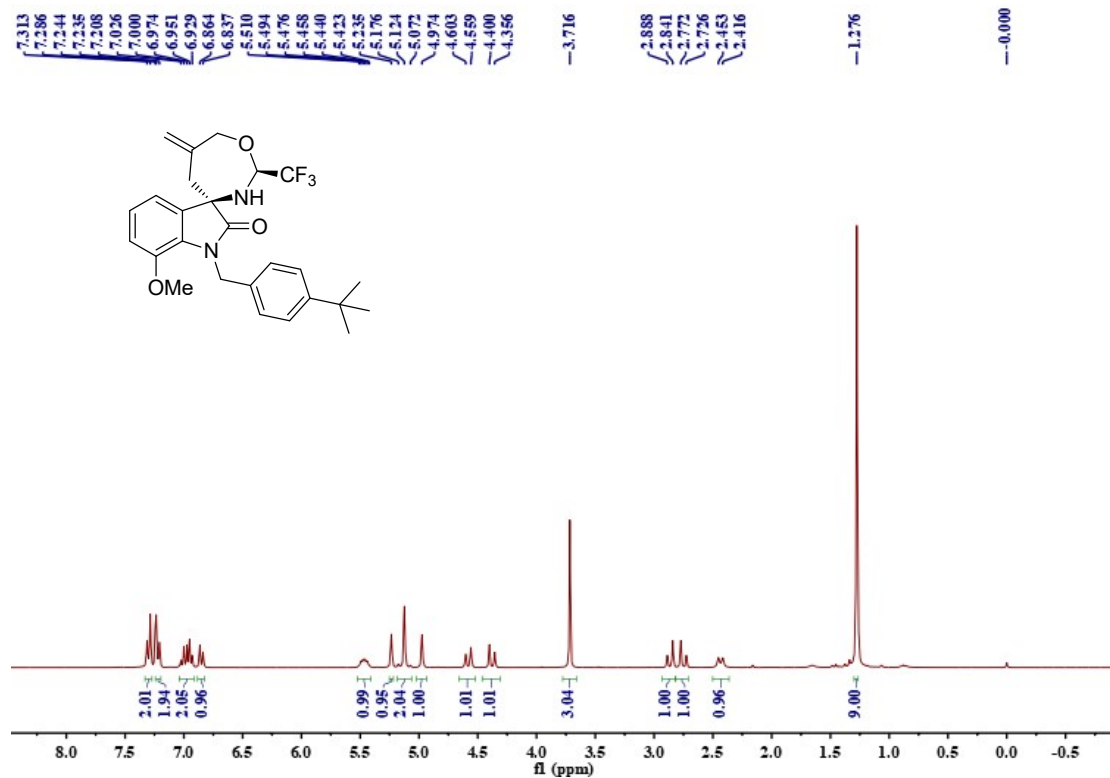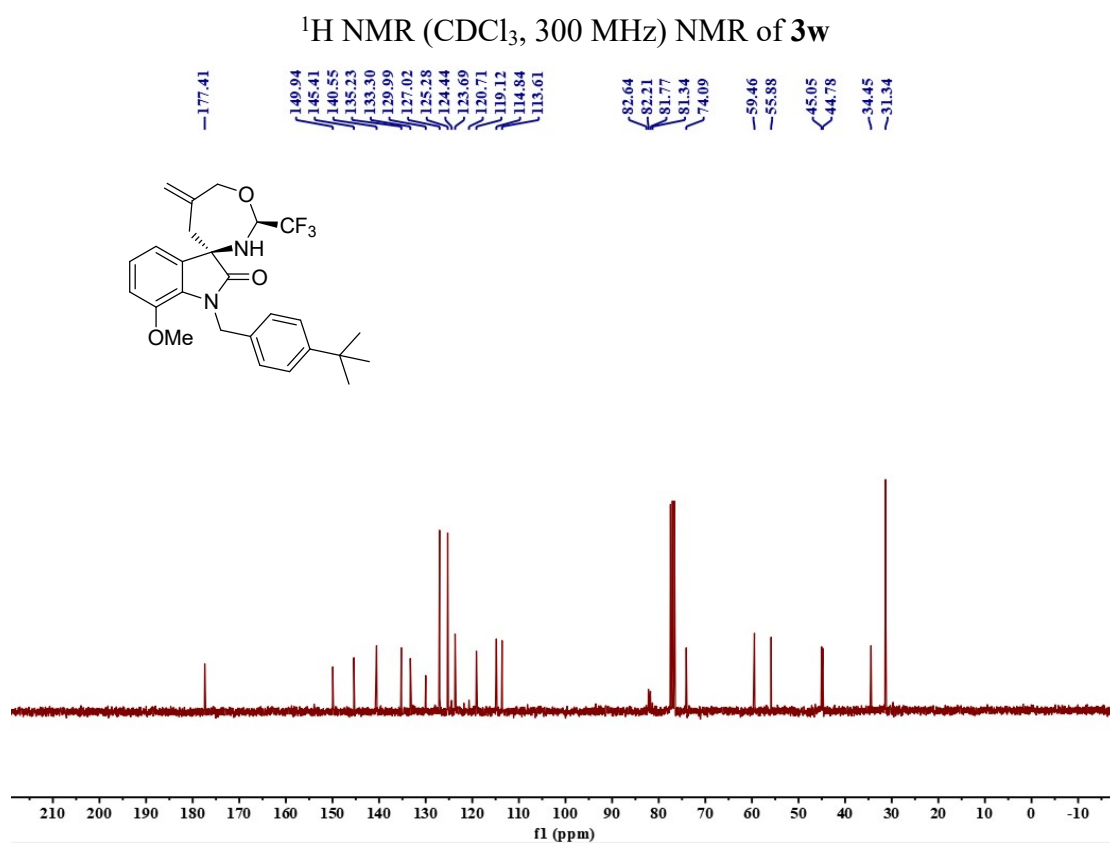

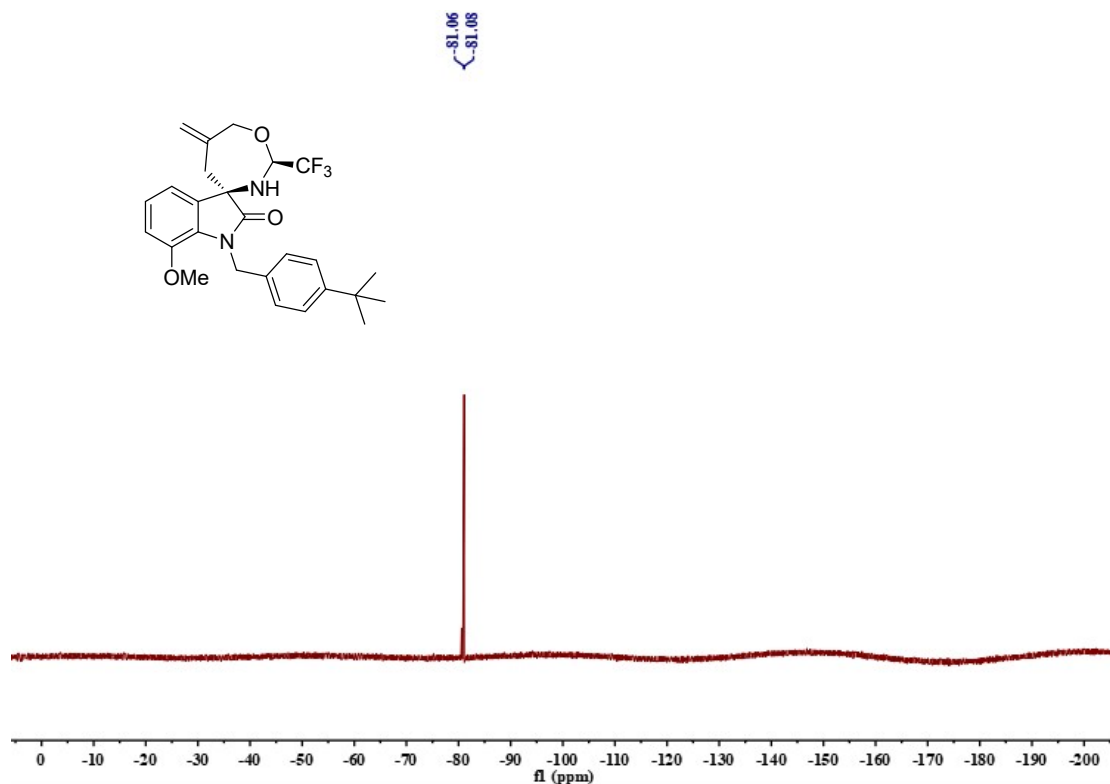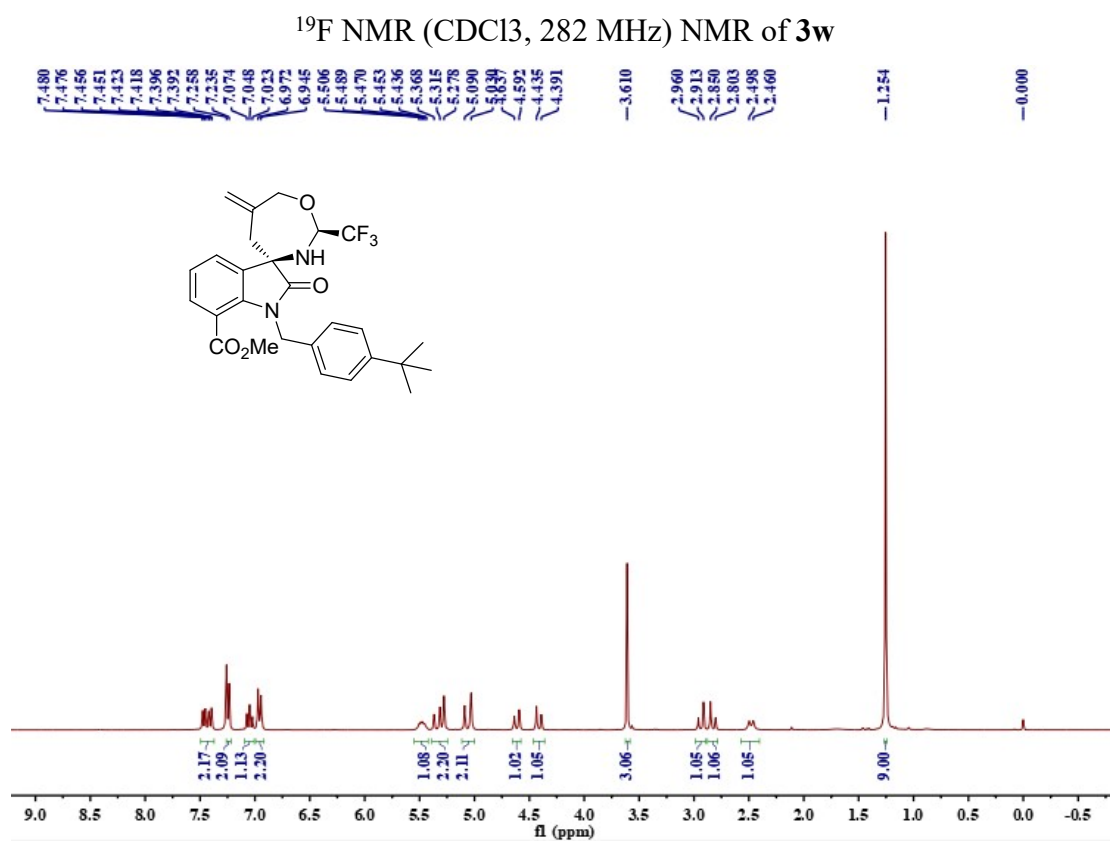

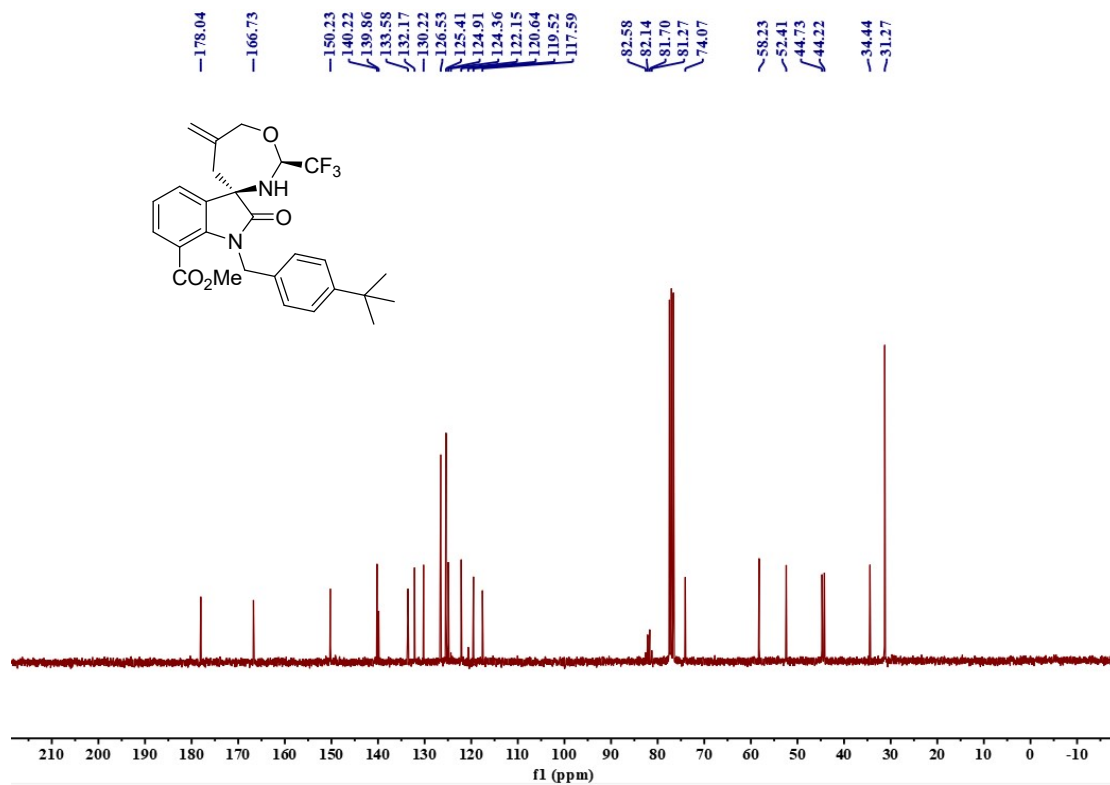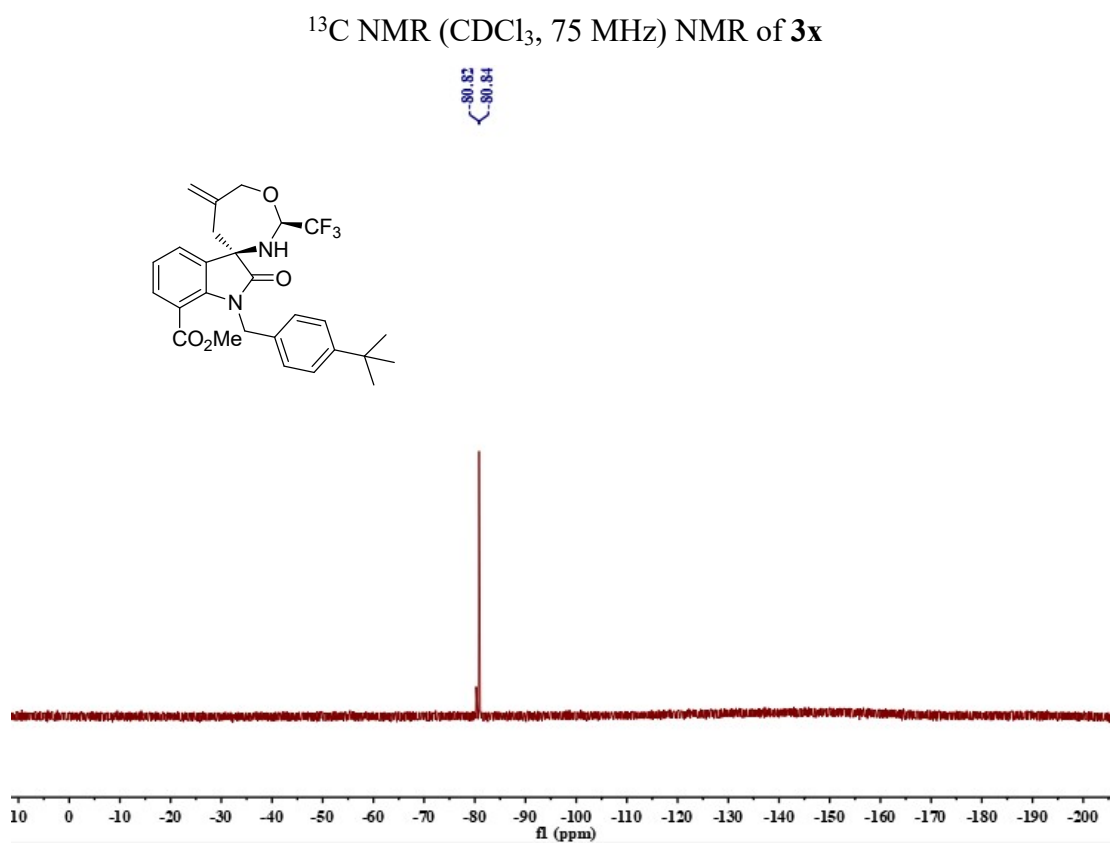

## 6. Copies of HPLC Chromatograms

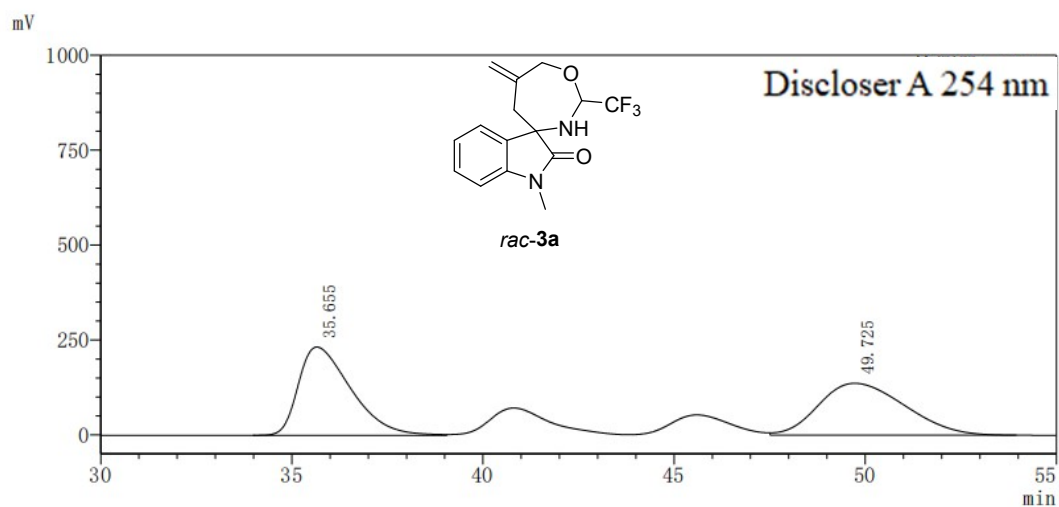

Discloser A 254 nm

| Peak  | Reten time (min) | Area (%) |
|-------|------------------|----------|
| 1     | 35.655           | 50.692   |
| 2     | 49.725           | 49.308   |
| total |                  | 100      |

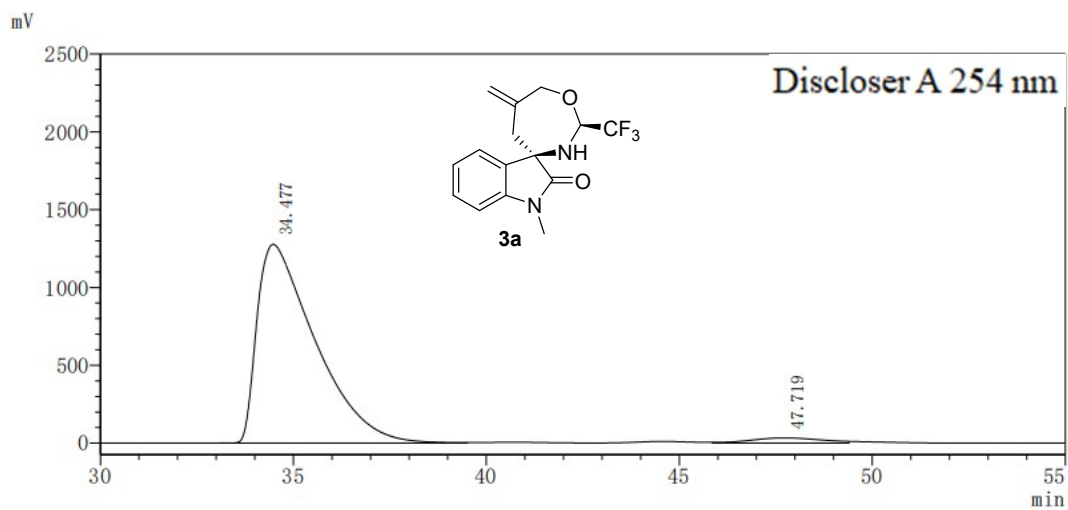

Discloser A 254 nm

| Peak | Reten time (min) | Area (%) |
|------|------------------|----------|
| 1    | 34.477           | 97.016   |
| 2    | 47.719           | 2.984    |

|       |  |     |
|-------|--|-----|
| total |  | 100 |
|-------|--|-----|

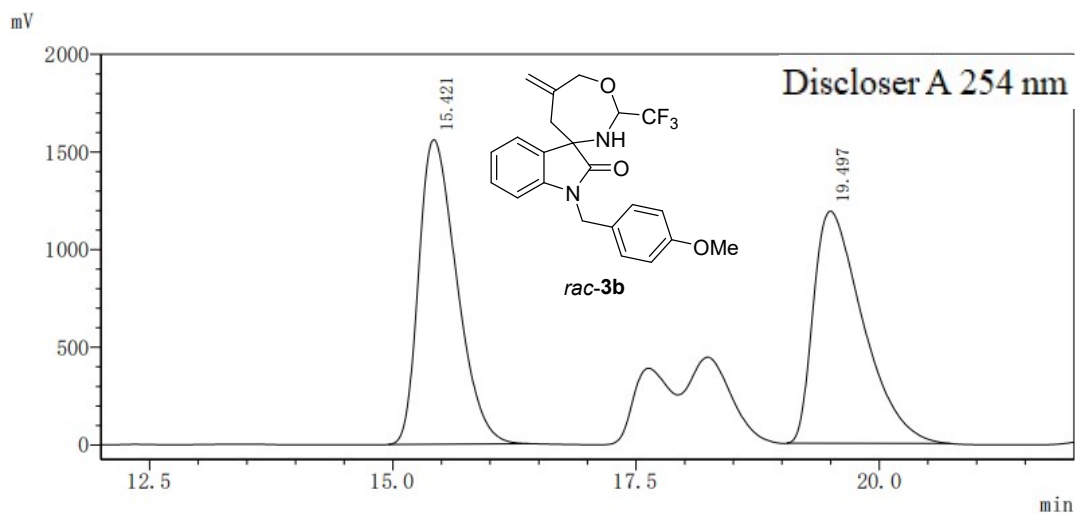

Discloser A 254 nm

| Peak  | Reten time (min) | Area (%) |
|-------|------------------|----------|
| 1     | 15.421           | 50.120   |
| 2     | 19.497           | 49.880   |
| total |                  | 100      |

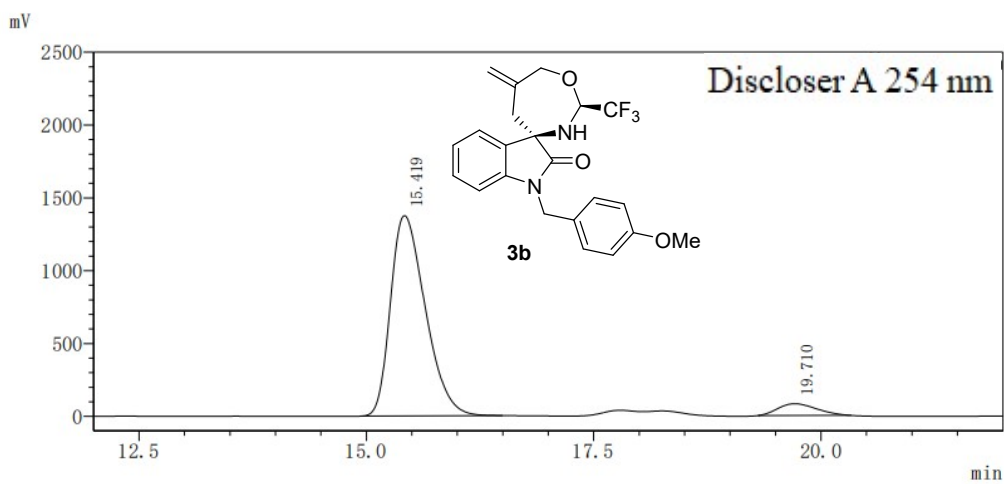

Discloser A 254 nm

| Peak  | Reten time (min) | Area (%) |
|-------|------------------|----------|
| 1     | 15.419           | 93.919   |
| 2     | 19.710           | 6.081    |
| total |                  | 100      |

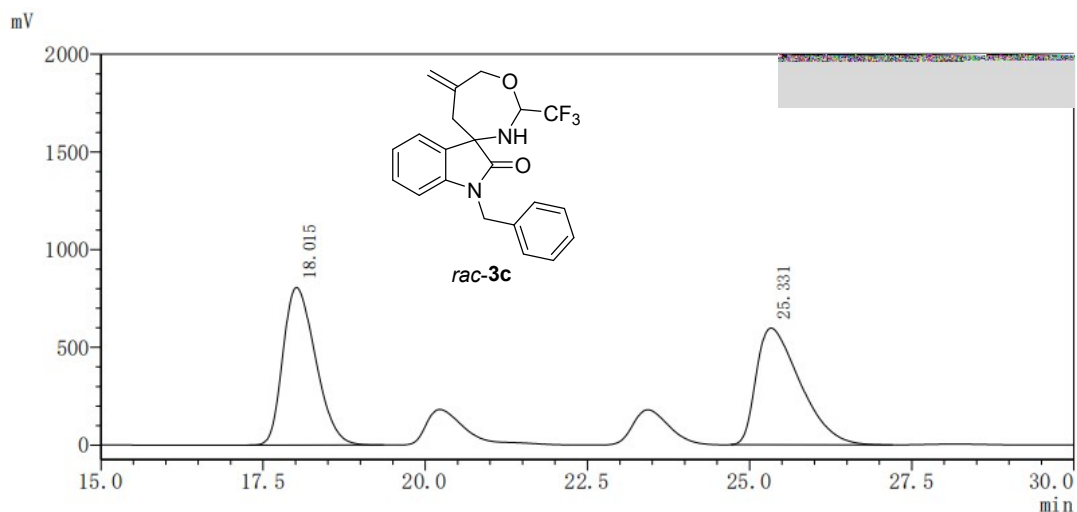

Discloser A 254 nm

| Peak  | Reten time (min) | Area (%) |
|-------|------------------|----------|
| 1     | 18.015           | 50.107   |
| 2     | 25.331           | 49.893   |
| total |                  | 100      |

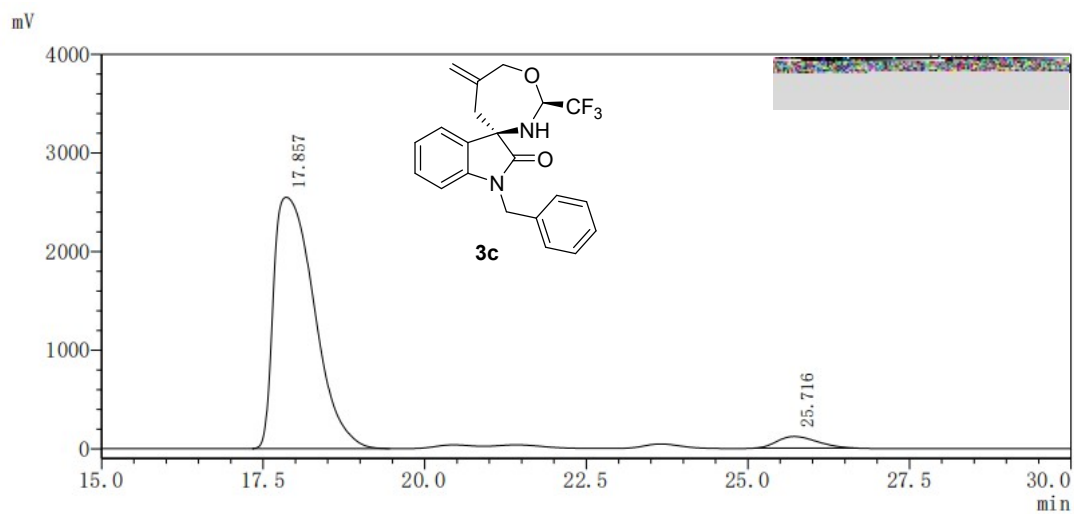

Discloser A 254 nm

| Peak  | Reten time (min) | Area (%) |
|-------|------------------|----------|
| 1     | 17.857           | 95.623   |
| 2     | 25.716           | 4.377    |
| total |                  | 100      |

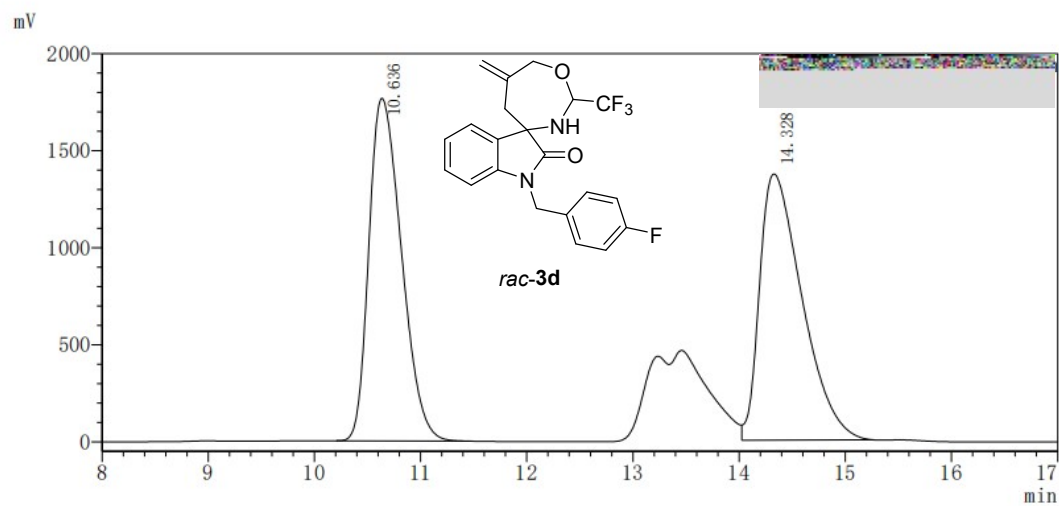

Discloser A 254 nm

| Peak  | Reten time (min) | Area (%) |
|-------|------------------|----------|
| 1     | 10.636           | 49.618   |
| 2     | 14.328           | 50.382   |
| total |                  | 100      |

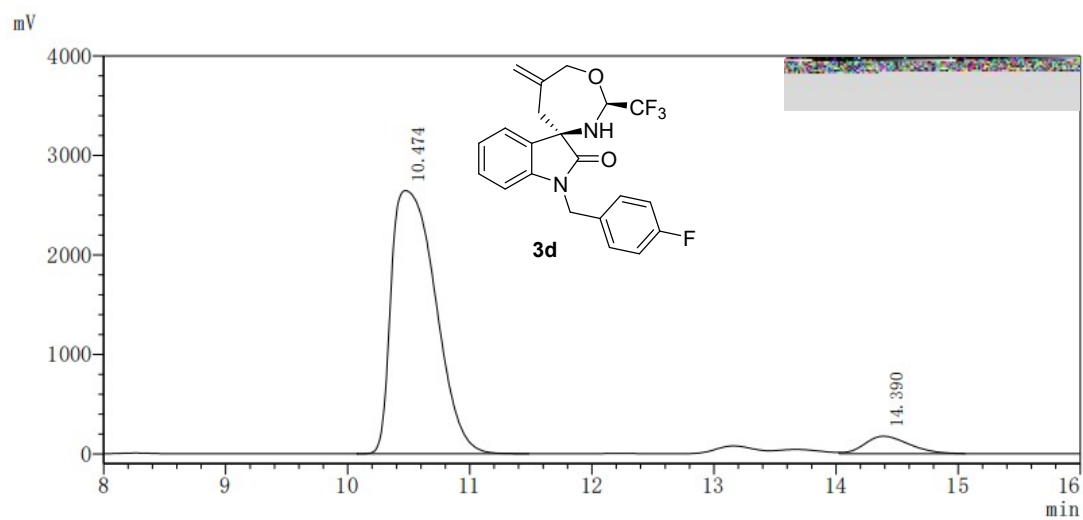

Discloser A 254 nm

| Peak  | Reten time (min) | Area (%) |
|-------|------------------|----------|
| 1     | 10.474           | 93.821   |
| 2     | 14.390           | 6.179    |
| total |                  | 100      |



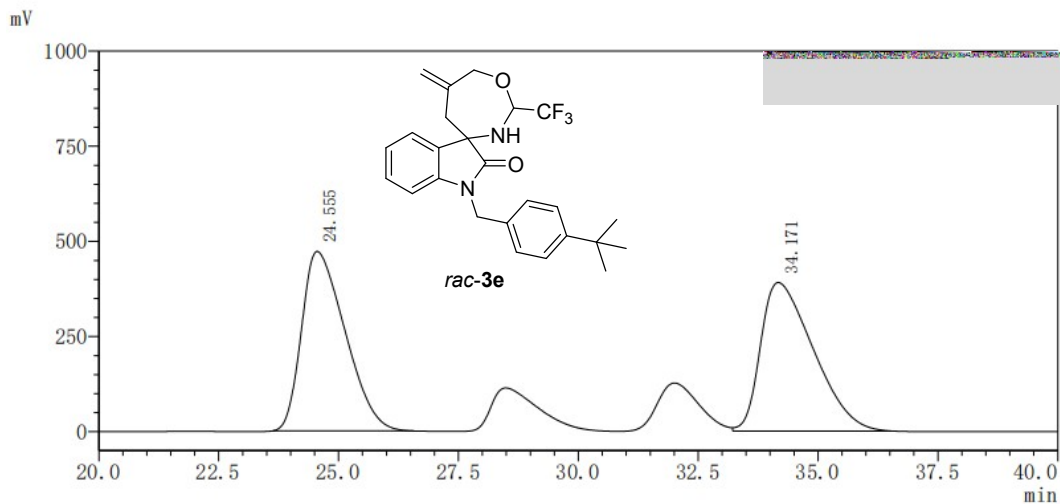

Discloser A 254 nm

| Peak  | Reten time (min) | Area (%) |
|-------|------------------|----------|
| 1     | 24.555           | 49.892   |
| 2     | 34.171           | 50.108   |
| total |                  | 100      |

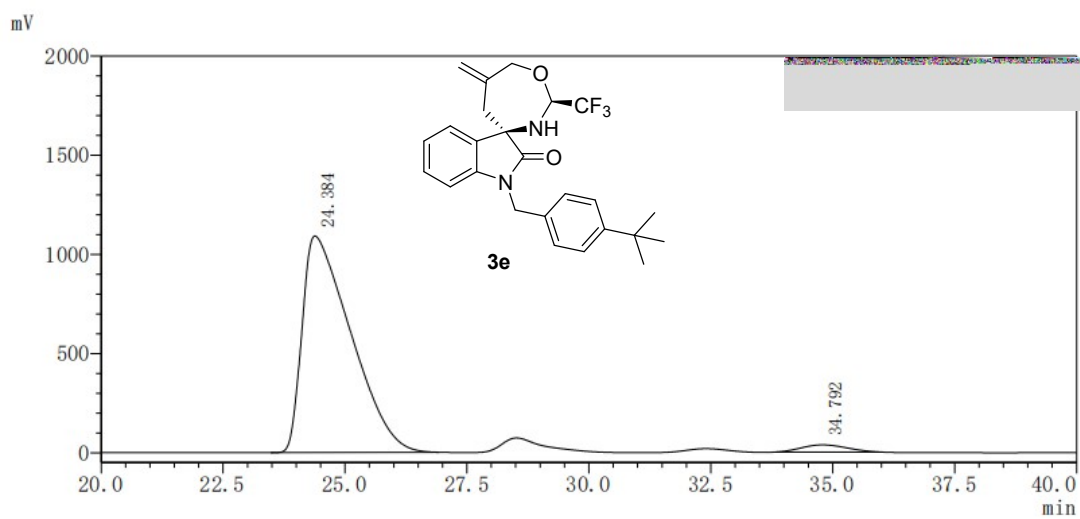

Discloser A 254 nm

| Peak  | Reten time (min) | Area (%) |
|-------|------------------|----------|
| 1     | 24.384           | 96.996   |
| 2     | 34.792           | 3.004    |
| total |                  | 100      |

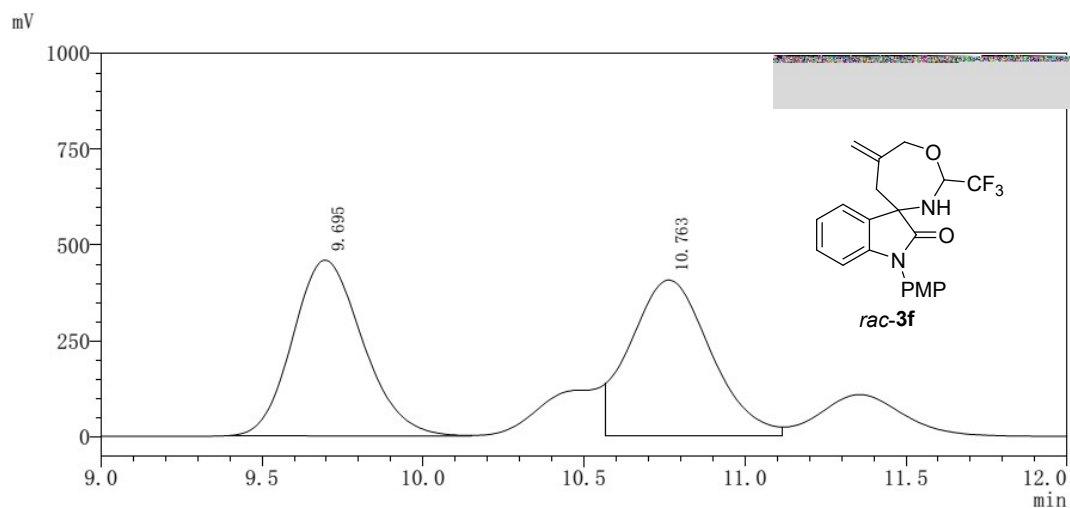

Discloser A 254 nm

| Peak  | Reten time (min) | Area (%) |
|-------|------------------|----------|
| 1     | 9.695            | 49.694   |
| 2     | 10.763           | 50.306   |
| total |                  | 100      |

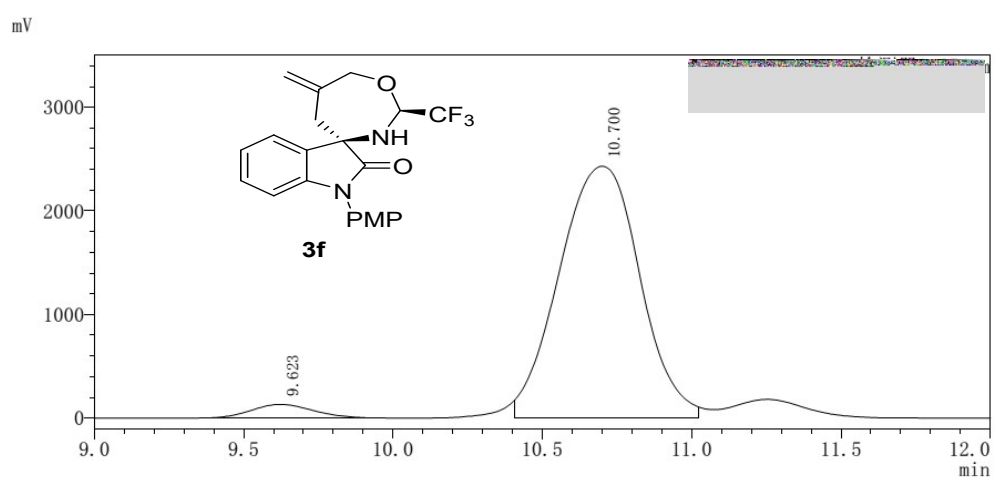

Discloser A 254 nm

| Peak  | Reten time (min) | Area (%) |
|-------|------------------|----------|
| 1     | 9.623            | 3.955    |
| 2     | 10.700           | 96.045   |
| total |                  | 100      |

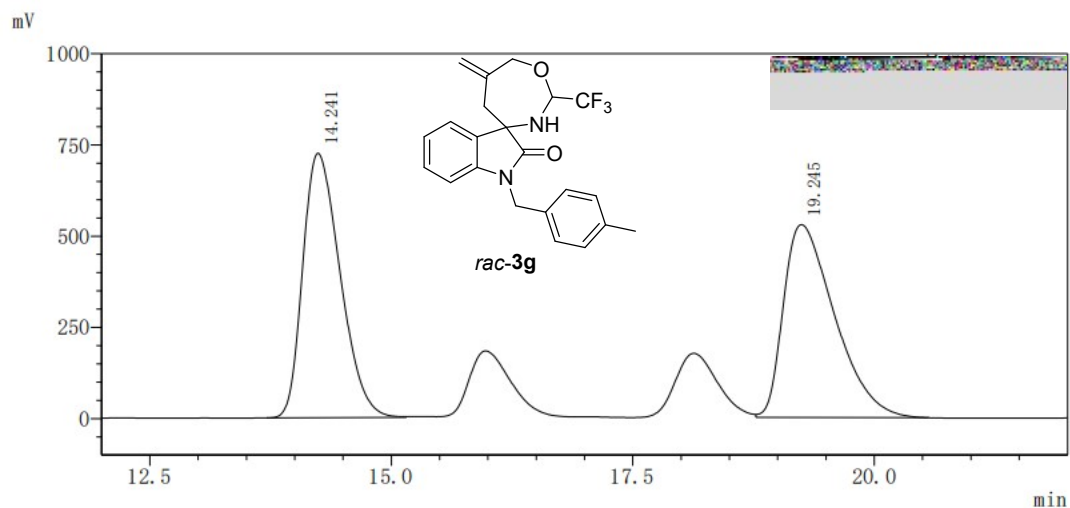

Discloser A 254 nm

| Peak  | Reten time (min) | Area (%) |
|-------|------------------|----------|
| 1     | 14.241           | 50.051   |
| 2     | 19.245           | 49.949   |
| total |                  | 100      |

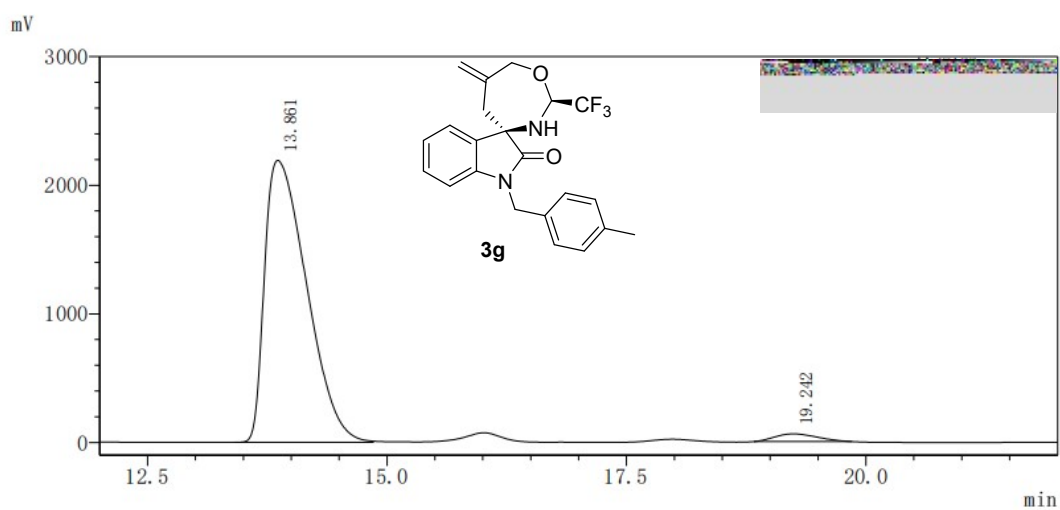

Discloser A 254 nm

| Peak  | Reten time (min) | Area (%) |
|-------|------------------|----------|
| 1     | 13.861           | 97.344   |
| 2     | 19.242           | 2.656    |
| total |                  | 100      |

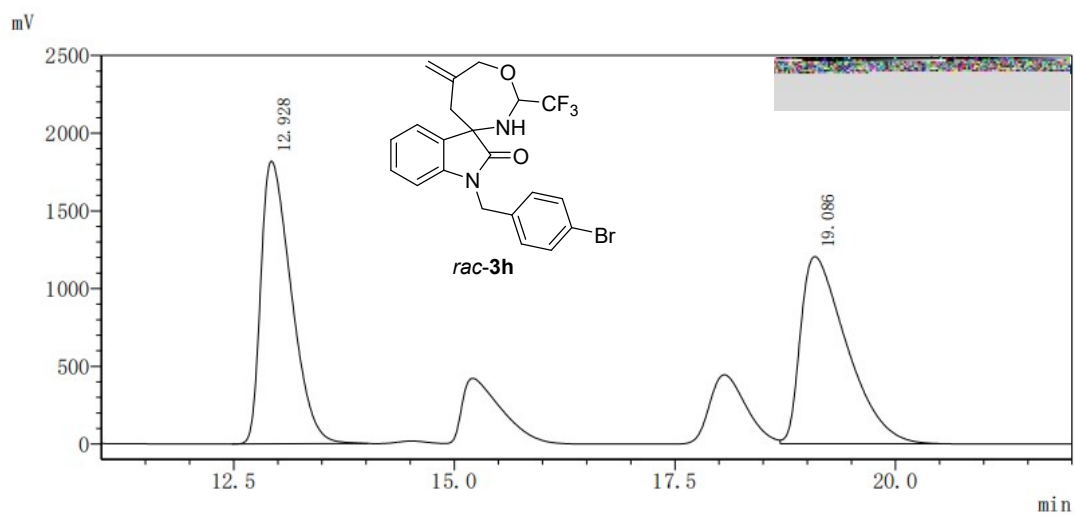

Discloser A 254 nm

| Peak  | Reten time (min) | Area (%) |
|-------|------------------|----------|
| 1     | 12.928           | 49.732   |
| 2     | 19.096           | 50.268   |
| total |                  | 100      |

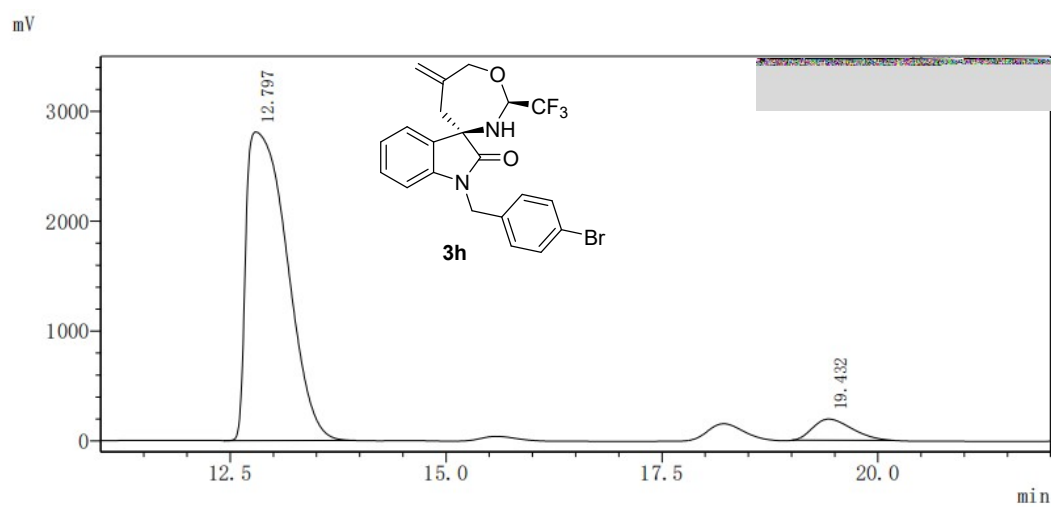

Discloser A 254 nm

| Peak  | Reten time (min) | Area (%) |
|-------|------------------|----------|
| 1     | 12.797           | 93.855   |
| 2     | 19.432           | 6.145    |
| total |                  | 100      |

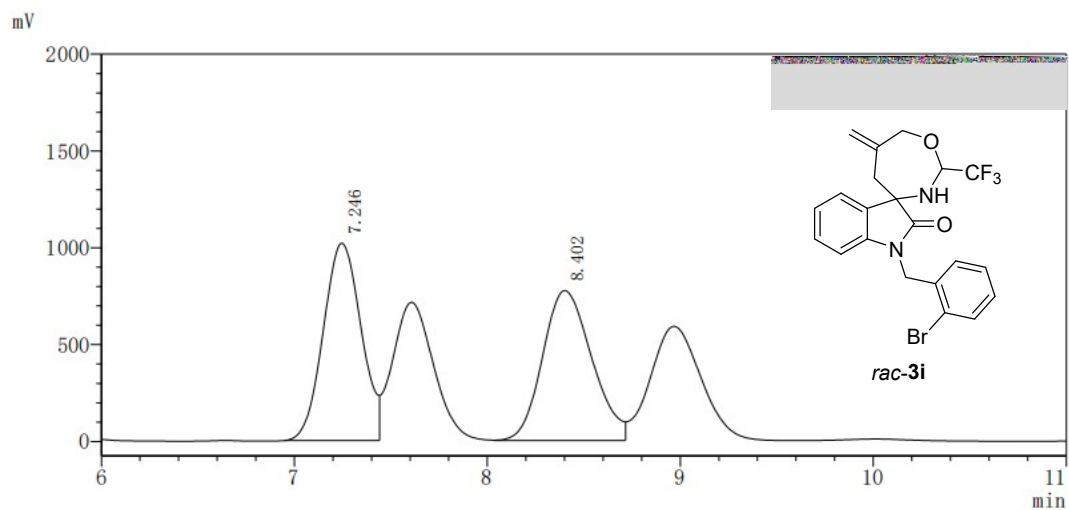

Discloser A 254 nm

| Peak  | Reten time (min) | Area (%) |
|-------|------------------|----------|
| 1     | 7.246            | 50.377   |
| 2     | 8.402            | 49.623   |
| total |                  | 100      |

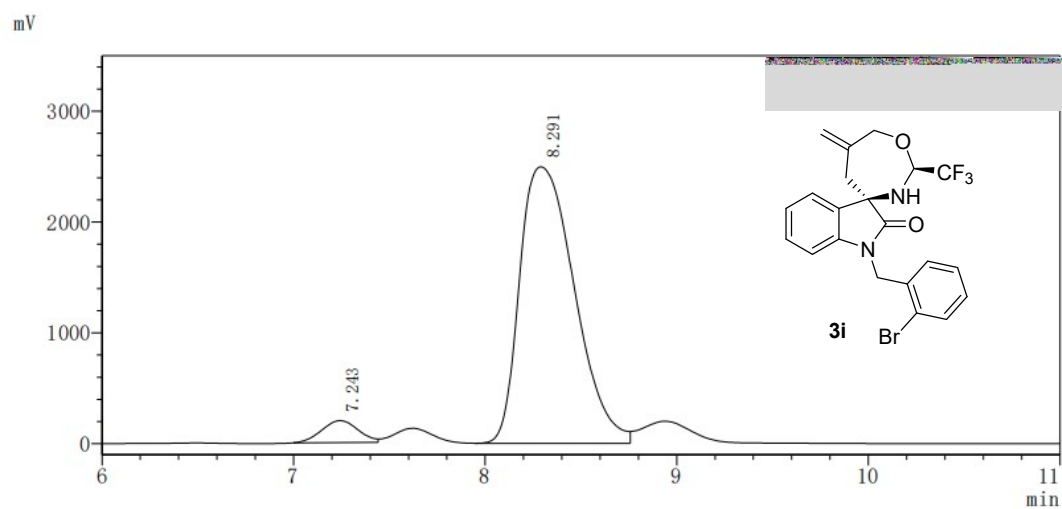

Discloser A 254 nm

| Peak  | Reten time (min) | Area (%) |
|-------|------------------|----------|
| 1     | 7.243            | 5.025    |
| 2     | 8.291            | 94.975   |
| total |                  | 100      |

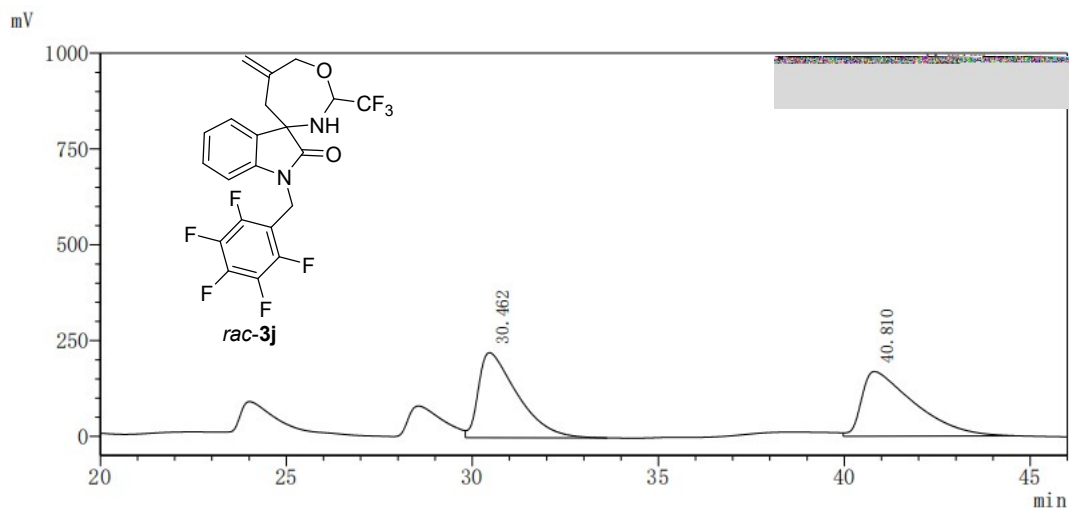

Discloser A 254 nm

| Peak  | Reten time (min) | Area (%) |
|-------|------------------|----------|
| 1     | 30.462           | 49.285   |
| 2     | 40.810           | 50.715   |
| total |                  | 100      |

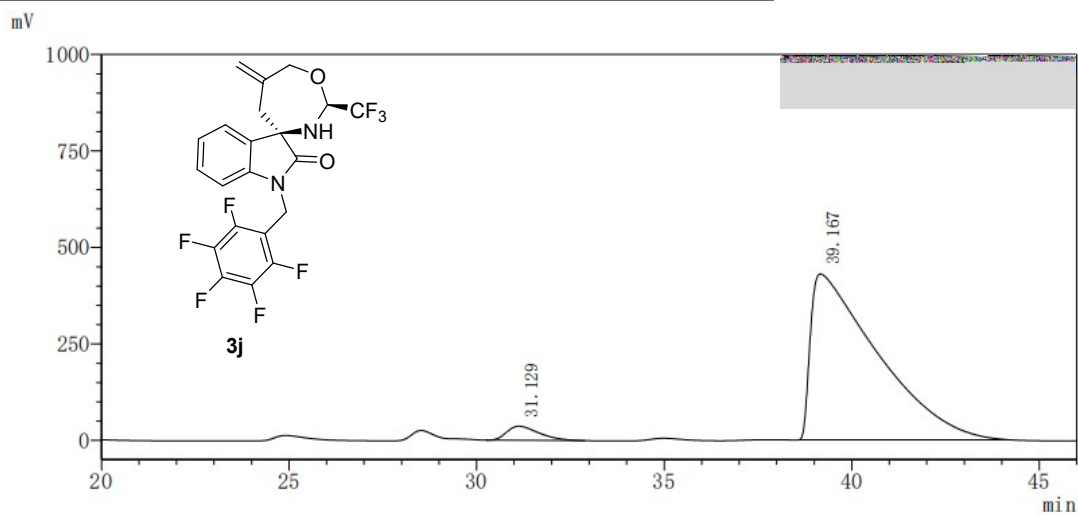

Discloser A 254 nm

| Peak  | Reten time (min) | Area (%) |
|-------|------------------|----------|
| 1     | 31.129           | 3.927    |
| 2     | 39.167           | 96.073   |
| total |                  | 100      |

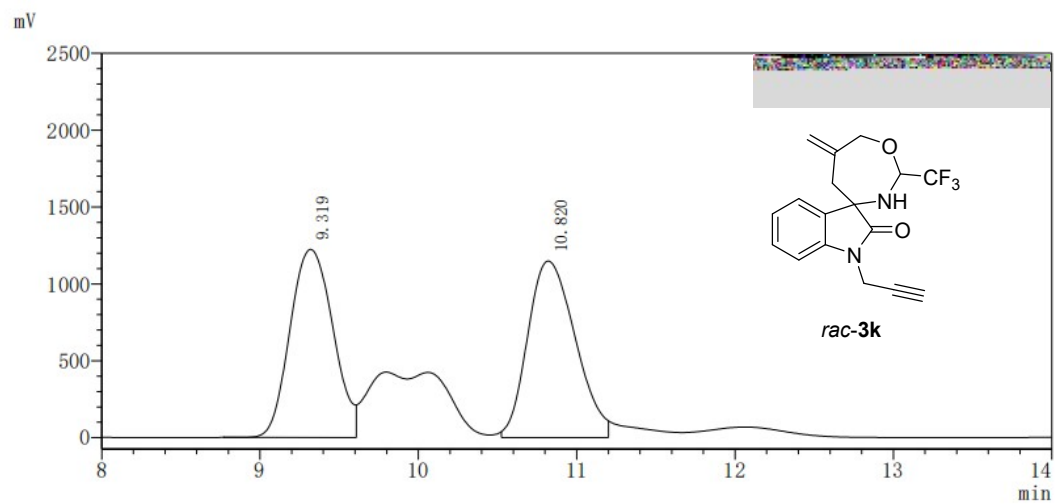

Discloser A 254 nm

| Peak  | Reten time (min) | Area (%) |
|-------|------------------|----------|
| 1     | 9.319            | 49.177   |
| 2     | 10.820           | 50.823   |
| total |                  | 100      |

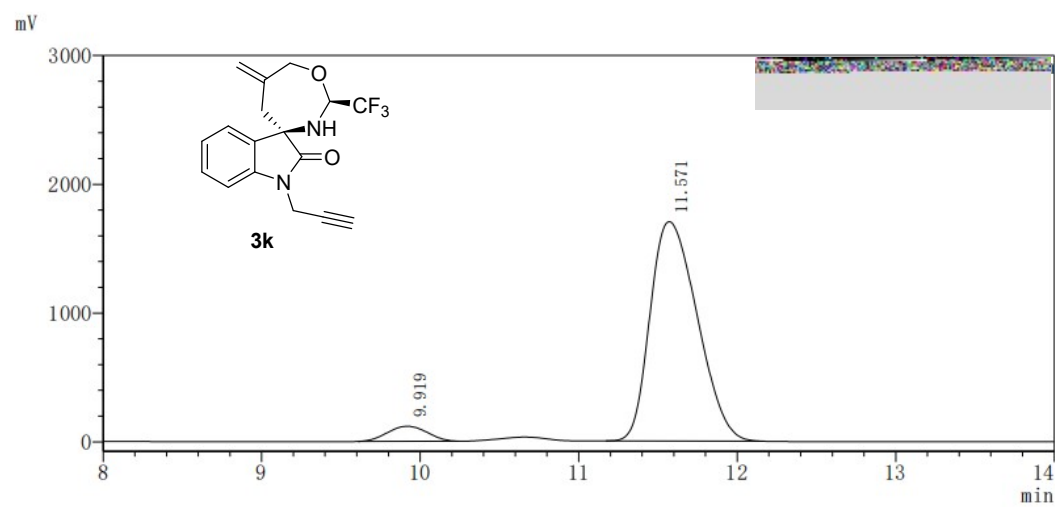

Discloser A 254 nm

| Peak  | Reten time (min) | Area (%) |
|-------|------------------|----------|
| 1     | 9.919            | 5.460    |
| 2     | 11.571           | 94.540   |
| total |                  | 100      |

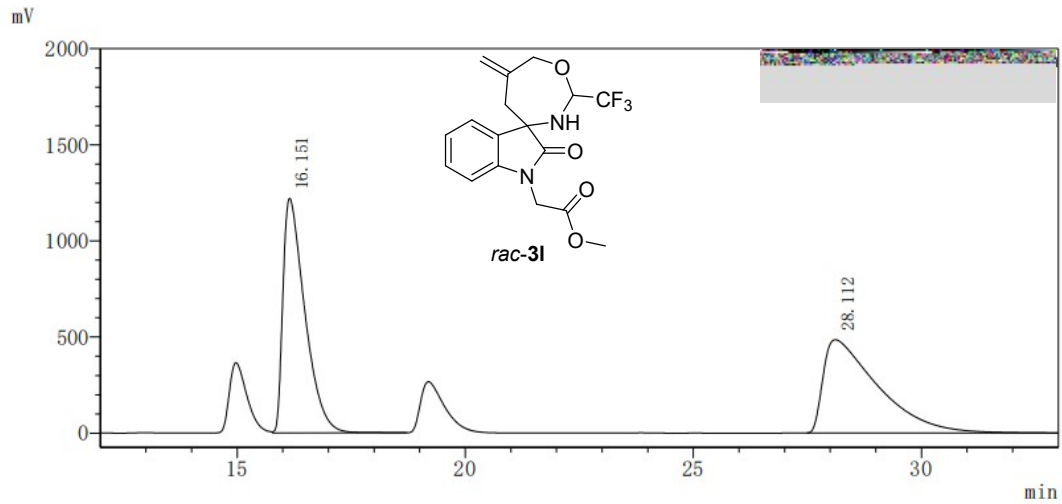

Discloser A 254 nm

| Peak  | Reten time (min) | Area (%) |
|-------|------------------|----------|
| 1     | 16.151           | 50.207   |
| 2     | 28.112           | 49.793   |
| total |                  | 100      |

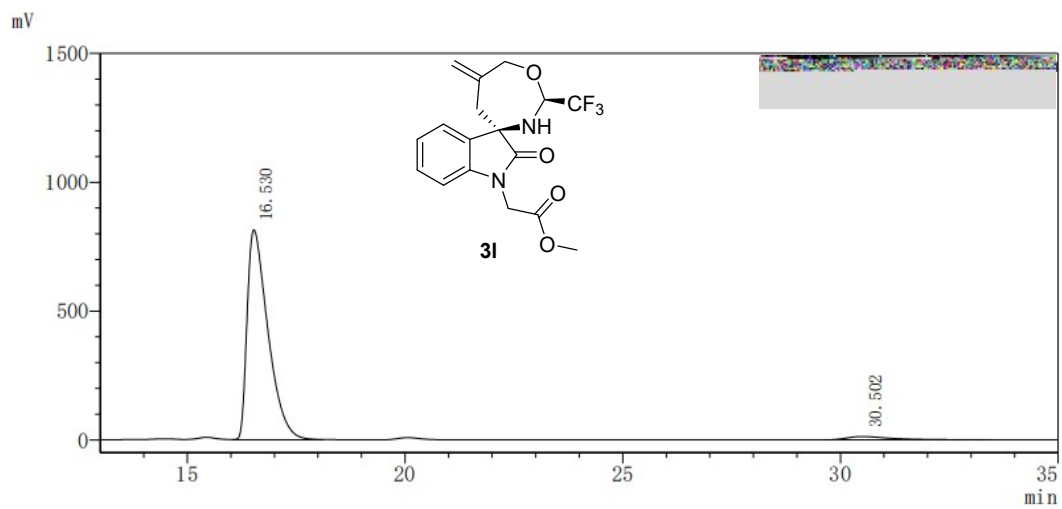

Discloser A 254 nm

| Peak  | Reten time (min) | Area (%) |
|-------|------------------|----------|
| 1     | 16.530           | 96.711   |
| 2     | 30.502           | 3.289    |
| total |                  | 100      |



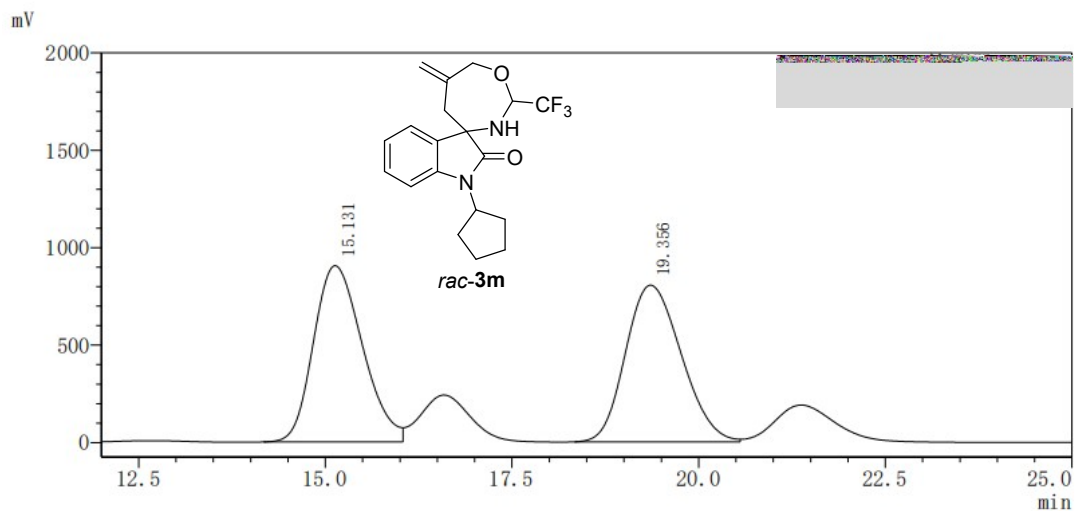

Discloser A 254 nm

| Peak  | Reten time (min) | Area (%) |
|-------|------------------|----------|
| 1     | 15.131           | 49.686   |
| 2     | 19.356           | 50.314   |
| total |                  | 100      |

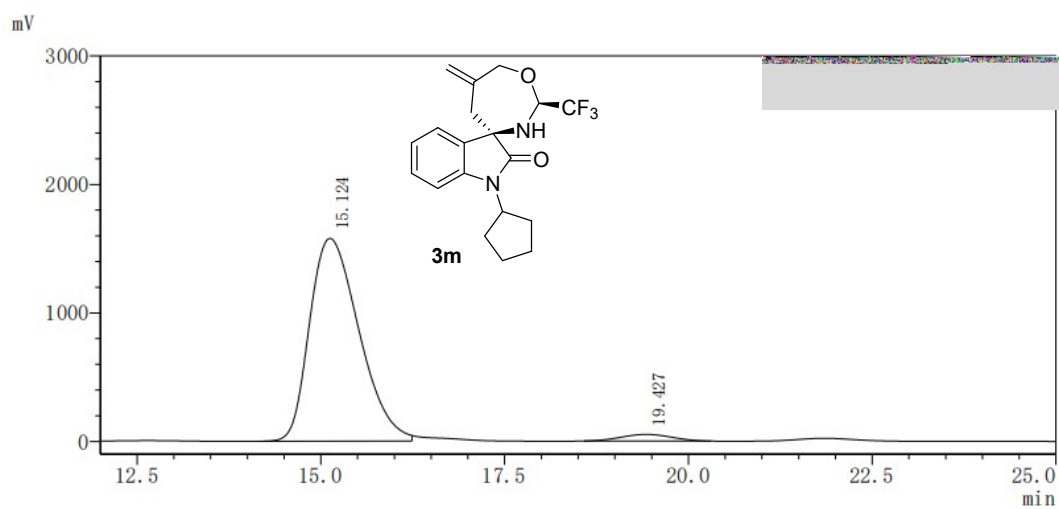

Discloser A 254 nm

| Peak  | Reten time (min) | Area (%) |
|-------|------------------|----------|
| 1     | 15.124           | 96.775   |
| 2     | 19.427           | 3.225    |
| total |                  | 100      |

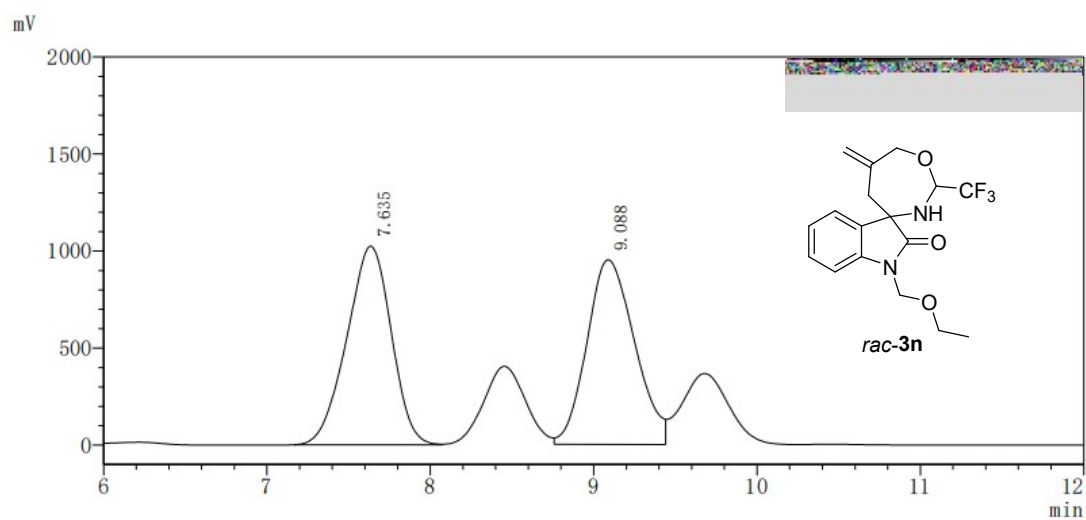

Discloser A 254 nm

| Peak  | Reten time (min) | Area (%) |
|-------|------------------|----------|
| 1     | 7.635            | 50.053   |
| 2     | 9.088            | 49.947   |
| total |                  | 100      |

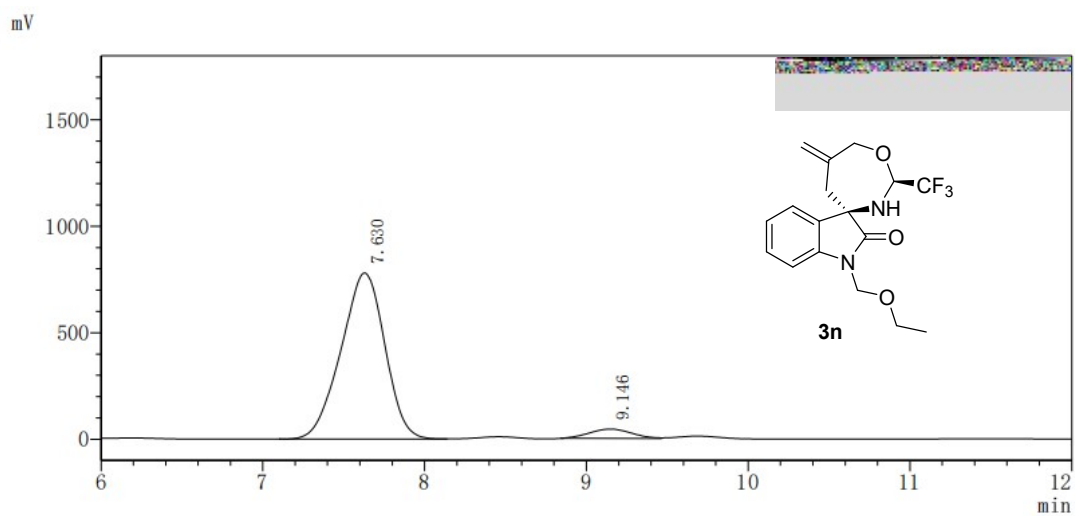

Discloser A 254 nm

| Peak  | Reten time (min) | Area (%) |
|-------|------------------|----------|
| 1     | 7.630            | 94.807   |
| 2     | 9.146            | 5.193    |
| total |                  | 100      |

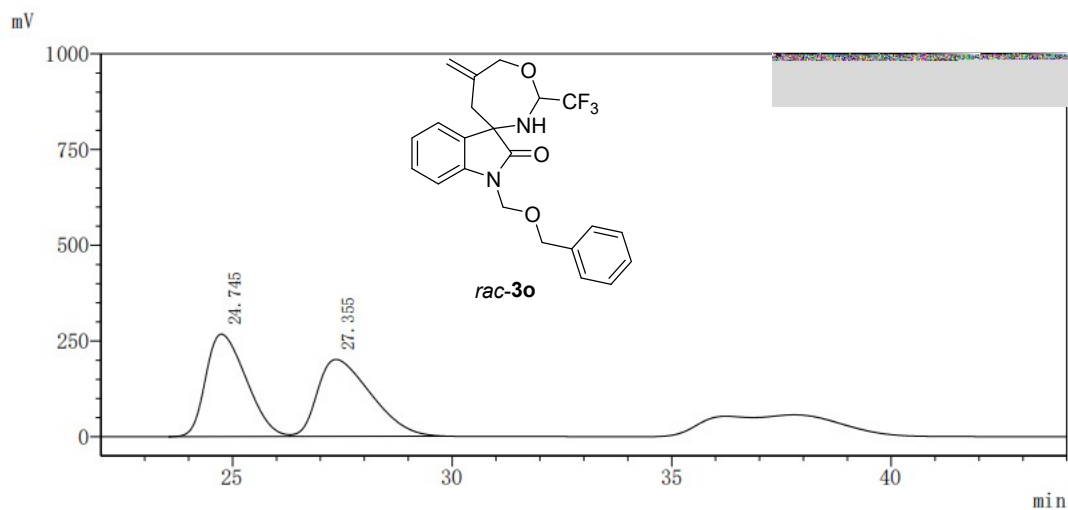

Discloser A 254 nm

| Peak  | Reten time (min) | Area (%) |
|-------|------------------|----------|
| 1     | 24.745           | 50.177   |
| 2     | 27.355           | 49.823   |
| total |                  | 100      |

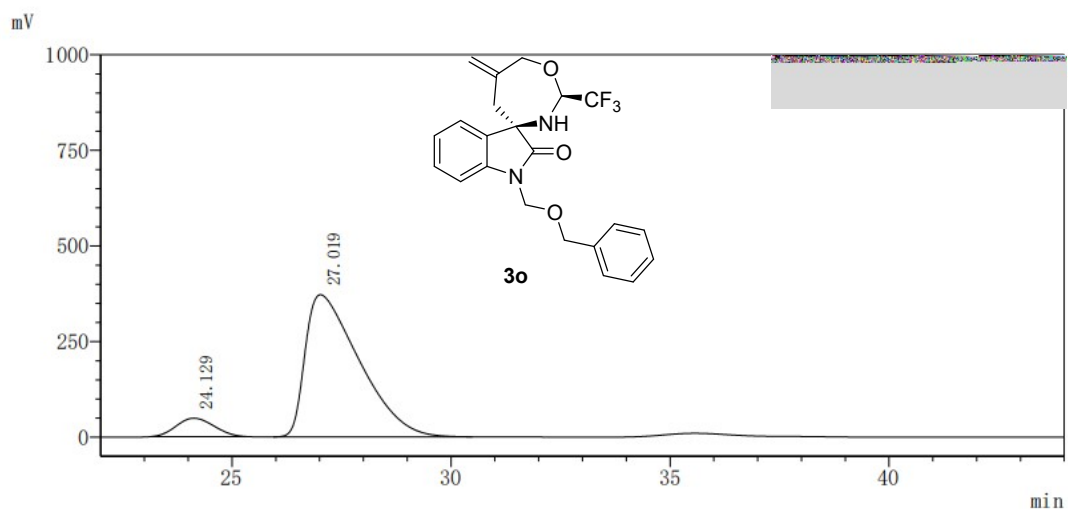

Discloser A 254 nm

| Peak  | Reten time (min) | Area (%) |
|-------|------------------|----------|
| 1     | 24.129           | 8.342    |
| 2     | 27.019           | 91.658   |
| total |                  | 100      |

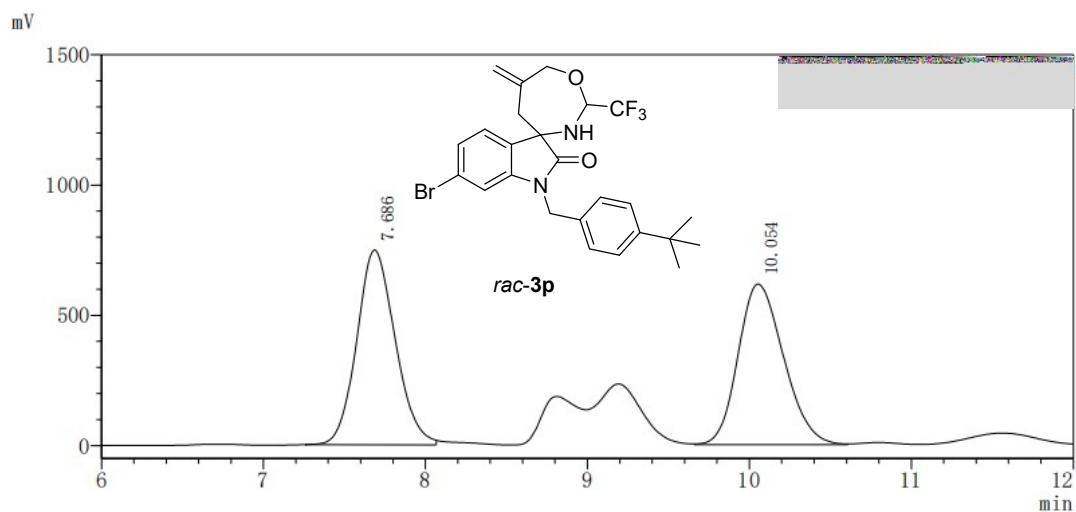

Discloser A 254 nm

| Peak  | Reten time (min) | Area (%) |
|-------|------------------|----------|
| 1     | 7.686            | 50.565   |
| 2     | 10.054           | 49.435   |
| total |                  | 100      |

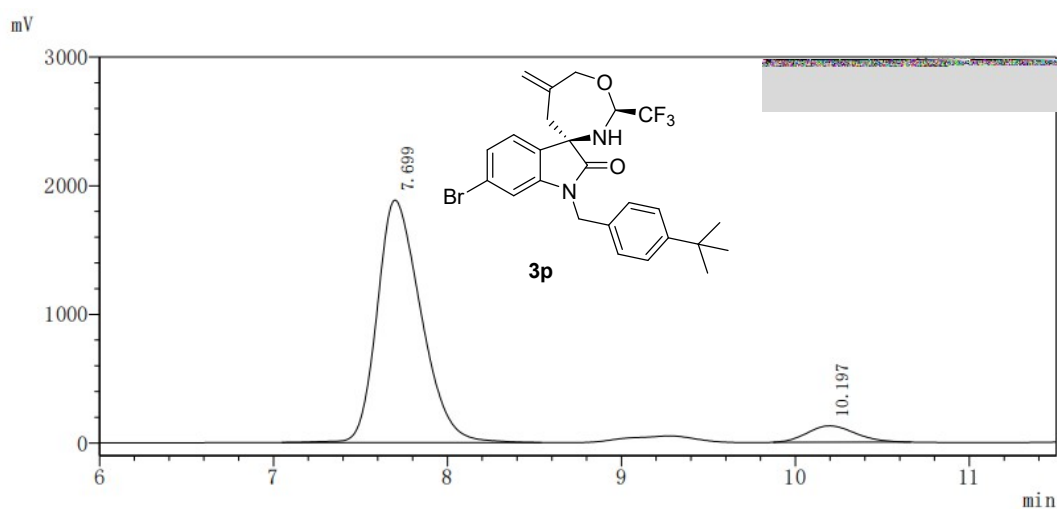

Discloser A 254 nm

| Peak  | Reten time (min) | Area (%) |
|-------|------------------|----------|
| 1     | 7.699            | 93.115   |
| 2     | 10.197           | 6.885    |
| total |                  | 100      |

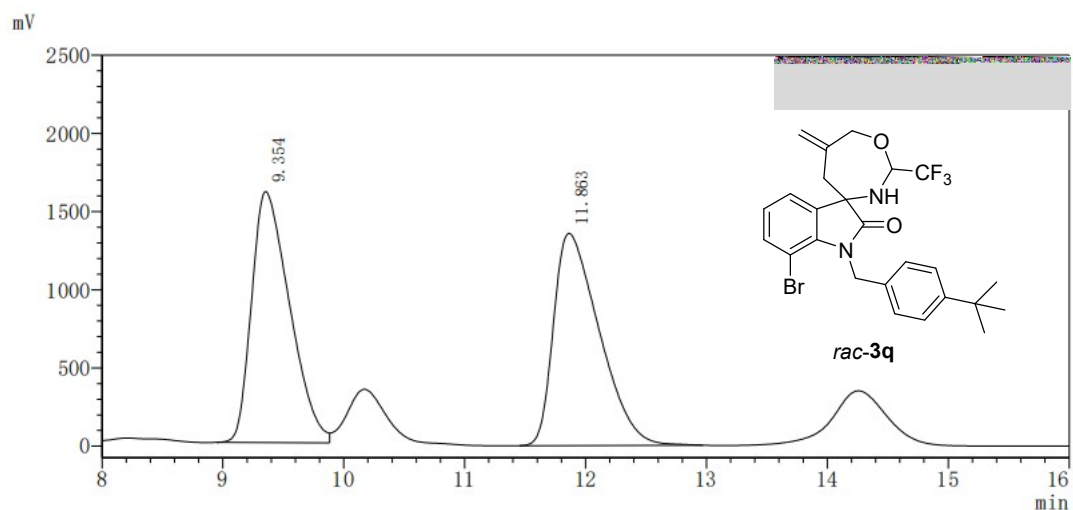

Discloser A 254 nm

| Peak  | Reten time (min) | Area (%) |
|-------|------------------|----------|
| 1     | 9.354            | 49.647   |
| 2     | 11.863           | 50.353   |
| total |                  | 100      |

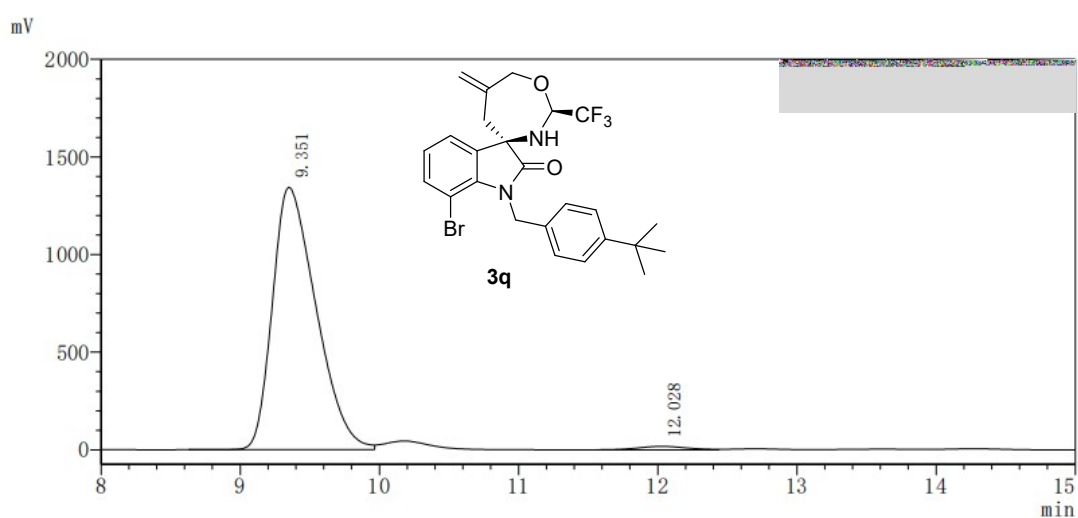

Discloser A 254 nm

| Peak  | Reten time (min) | Area (%) |
|-------|------------------|----------|
| 1     | 9.351            | 98.569   |
| 2     | 12.028           | 1.431    |
| total |                  | 100      |

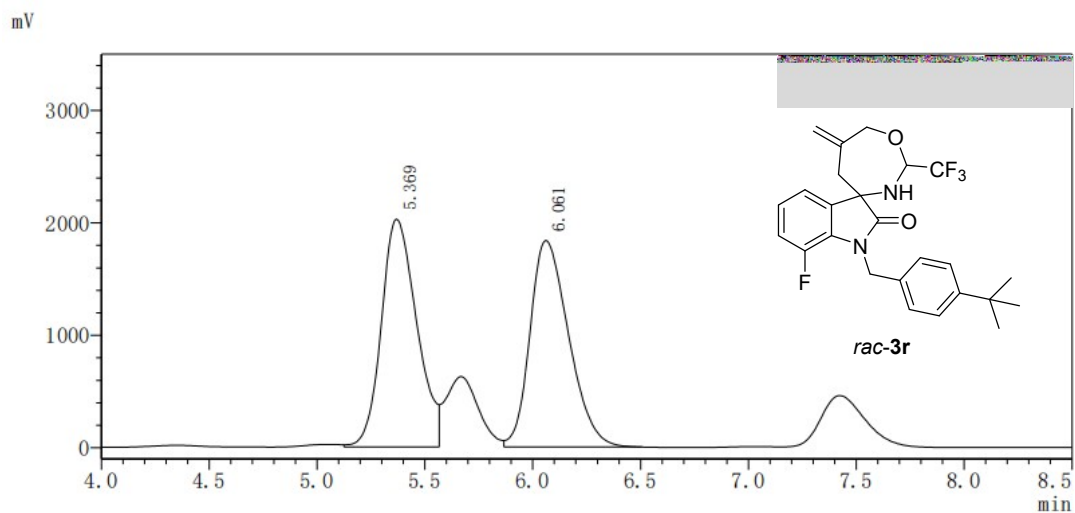

Discloser A 254 nm

| Peak  | Reten time (min) | Area (%) |
|-------|------------------|----------|
| 1     | 5.369            | 50.345   |
| 2     | 6.061            | 49.655   |
| total |                  | 100      |

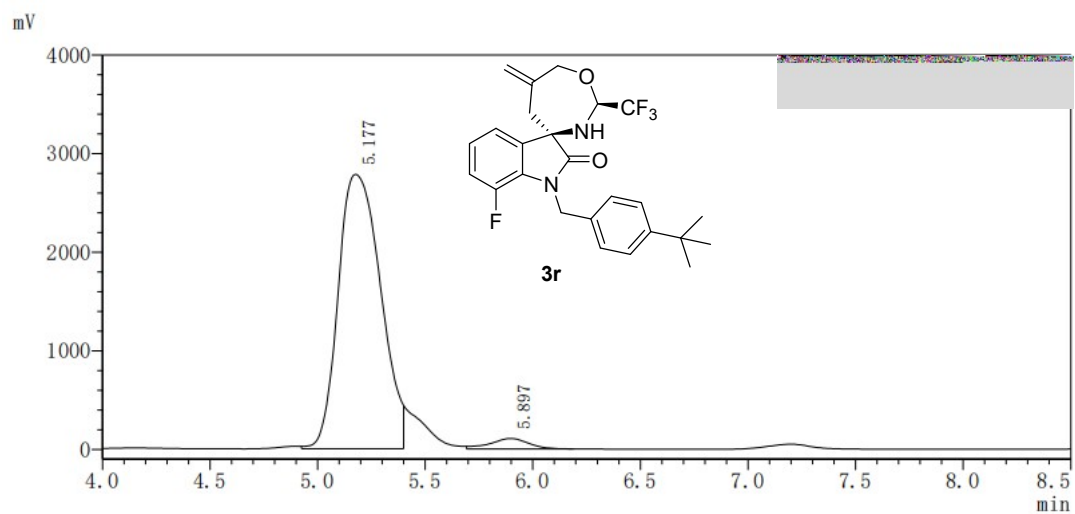

Discloser A 254 nm

| Peak  | Reten time (min) | Area (%) |
|-------|------------------|----------|
| 1     | 5.177            | 96.373   |
| 2     | 5.897            | 3.327    |
| total |                  | 100      |

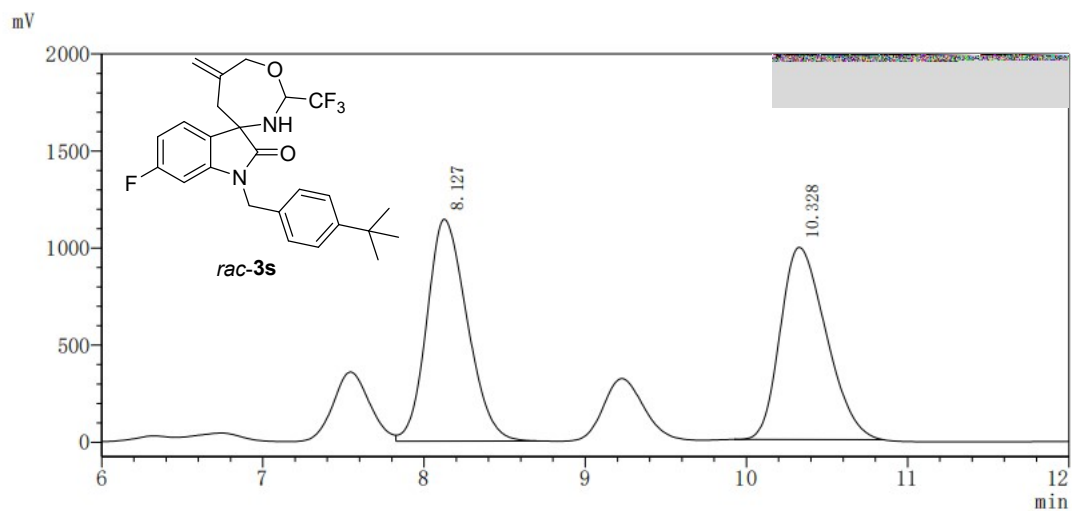

Discloser A 254 nm

| Peak  | Reten time (min) | Area (%) |
|-------|------------------|----------|
| 1     | 8.127            | 50.331   |
| 2     | 10.328           | 49.669   |
| total |                  | 100      |

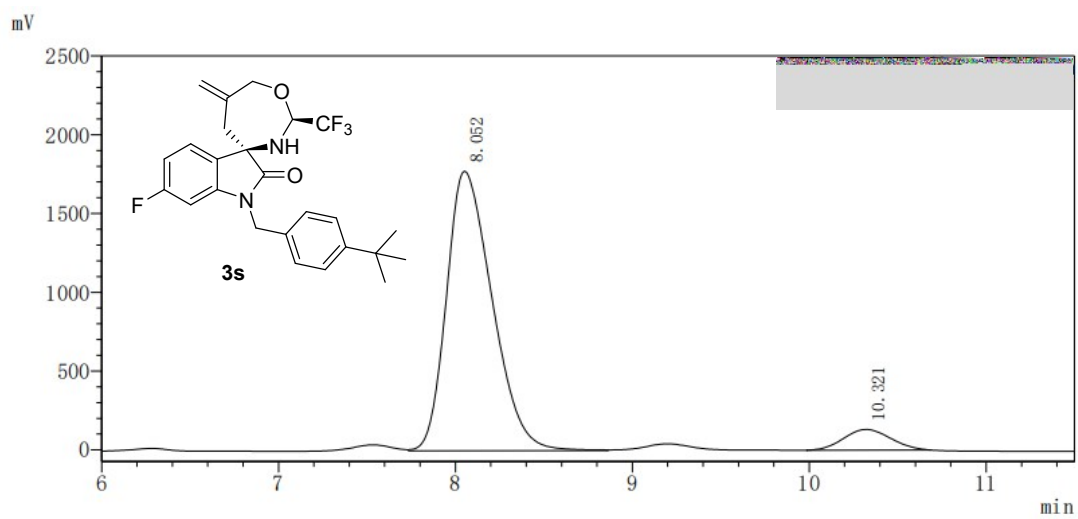

Discloser A 254 nm

| Peak  | Reten time (min) | Area (%) |
|-------|------------------|----------|
| 1     | 8.062            | 92.943   |
| 2     | 10.321           | 7.057    |
| total |                  | 100      |

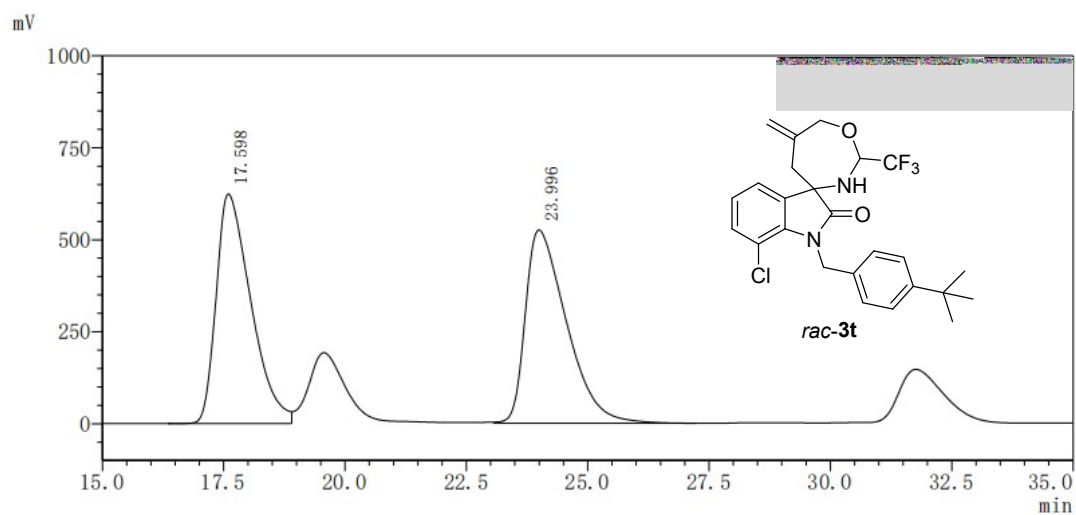

Discloser A 254 nm

| Peak  | Reten time (min) | Area (%) |
|-------|------------------|----------|
| 1     | 17.598           | 49.970   |
| 2     | 23.996           | 50.030   |
| total |                  | 100      |

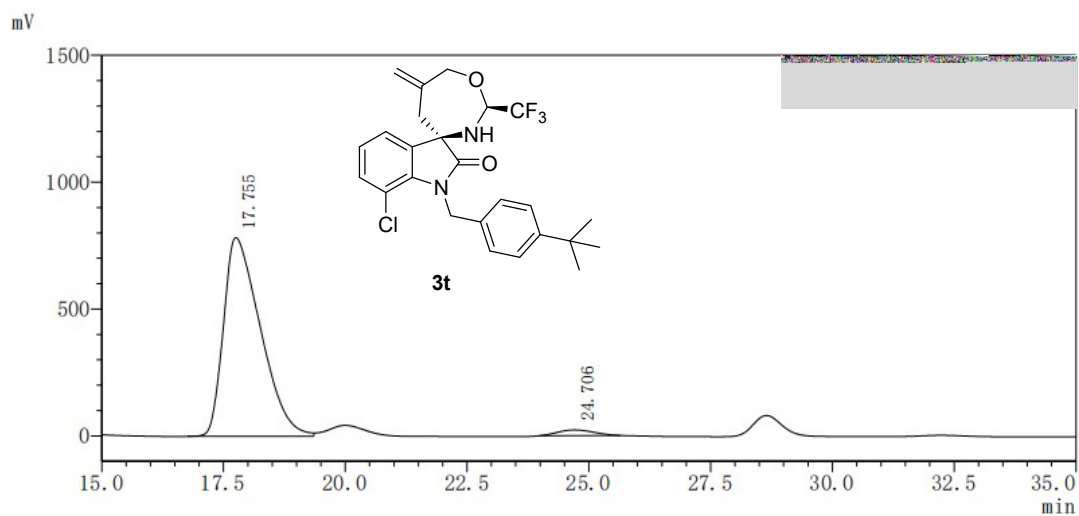

Discloser A 254 nm

| Peak  | Reten time (min) | Area (%) |
|-------|------------------|----------|
| 1     | 17.755           | 97.304   |
| 2     | 24.706           | 2.696    |
| total |                  | 100      |



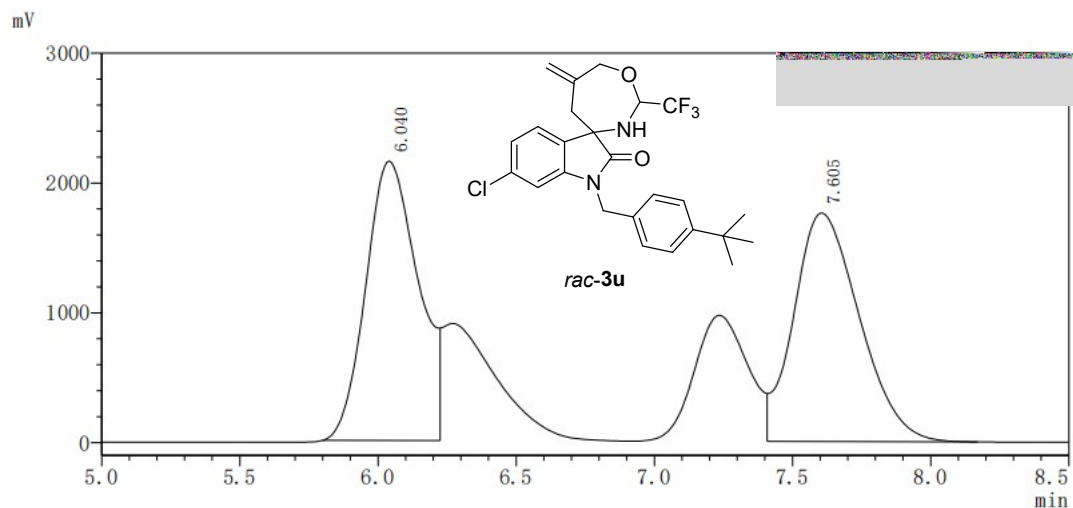

Discloser A 254 nm

| Peak  | Reten time (min) | Area (%) |
|-------|------------------|----------|
| 1     | 6.040            | 49.650   |
| 2     | 7.605            | 50.350   |
| total |                  | 100      |

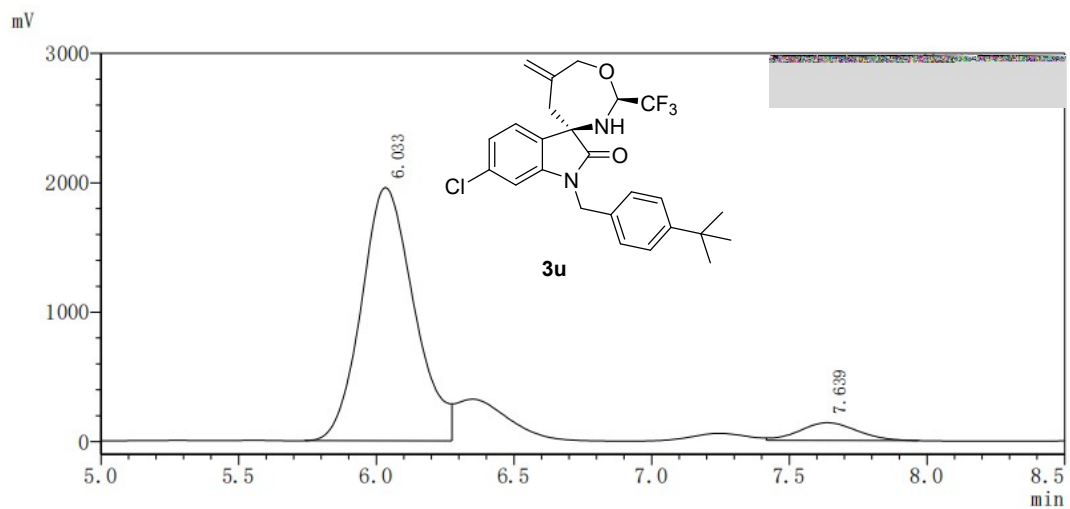

Discloser A 254 nm

| Peak  | Reten time (min) | Area (%) |
|-------|------------------|----------|
| 1     | 6.033            | 92.928   |
| 2     | 7.639            | 7.072    |
| total |                  | 100      |

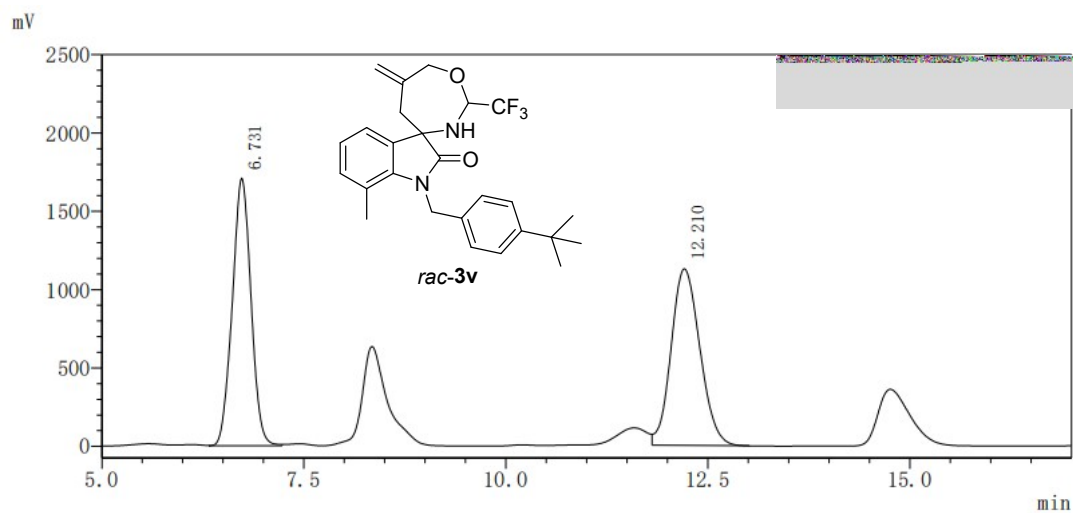

Discloser A 254 nm

| Peak  | Reten time (min) | Area (%) |
|-------|------------------|----------|
| 1     | 6.731            | 49.556   |
| 2     | 12.210           | 50.444   |
| total |                  | 100      |

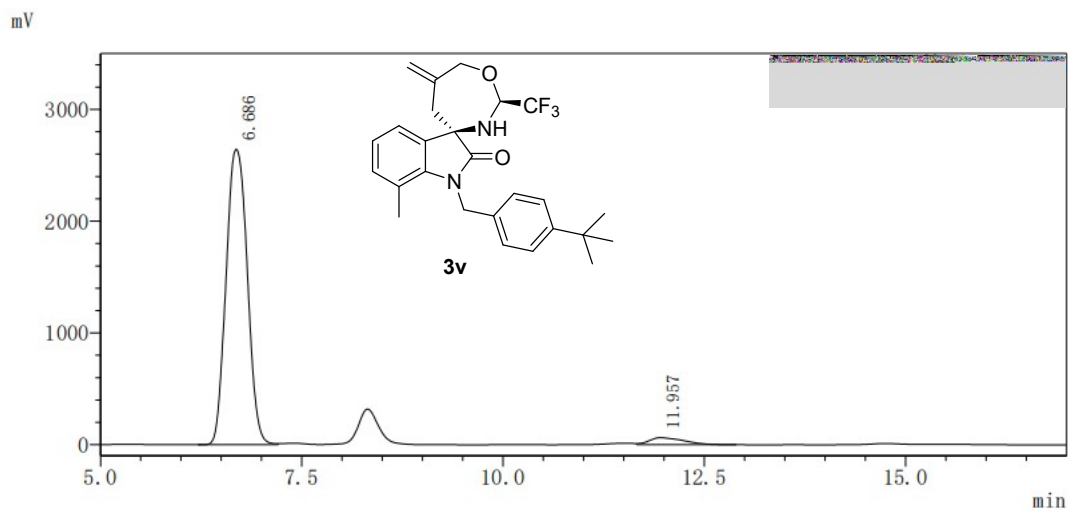

Discloser A 254 nm

| Peak  | Reten time (min) | Area (%) |
|-------|------------------|----------|
| 1     | 6.686            | 96.227   |
| 2     | 11.957           | 3.773    |
| total |                  | 100      |

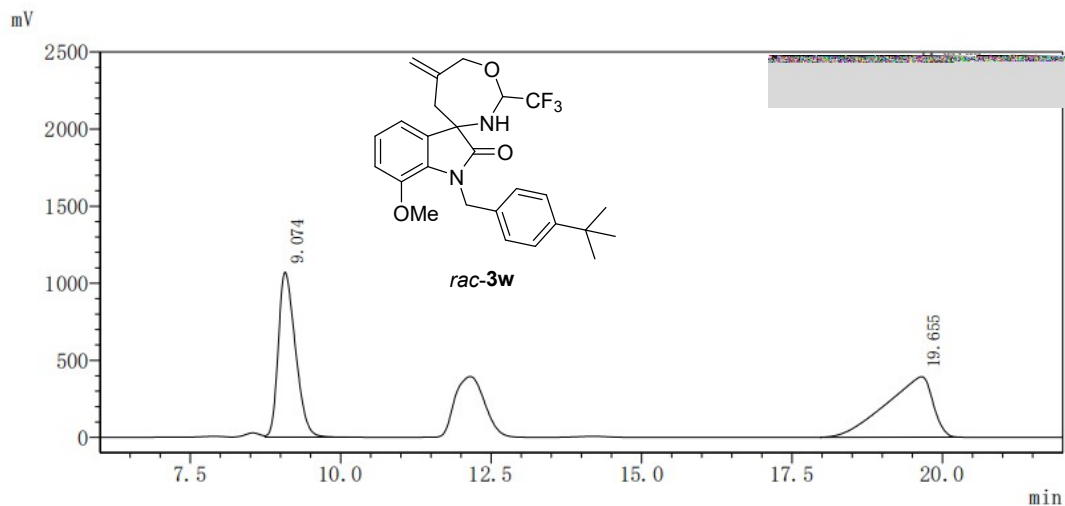

Discloser A 254 nm

| Peak  | Reten time (min) | Area (%) |
|-------|------------------|----------|
| 1     | 9.074            | 49.972   |
| 2     | 19.655           | 50.028   |
| total |                  | 100      |

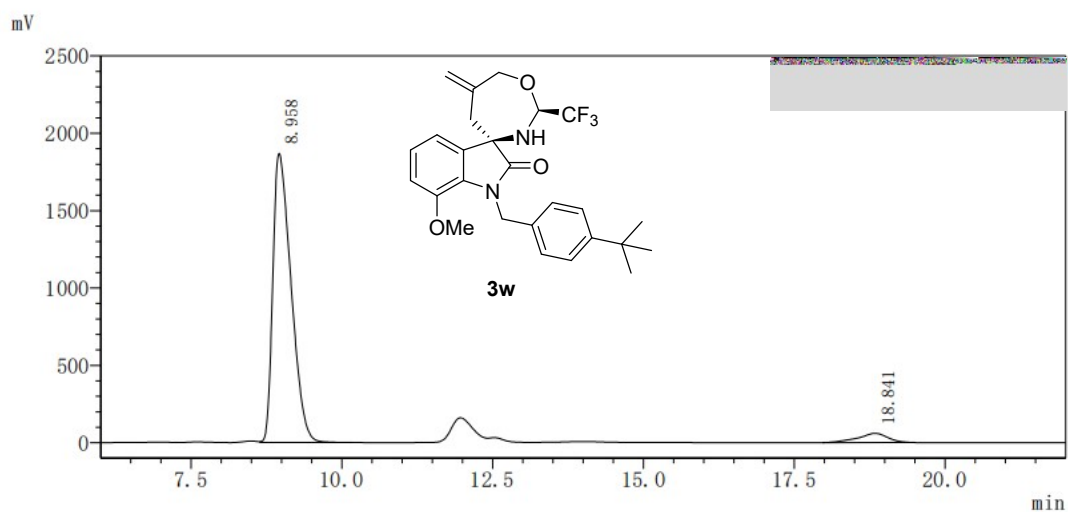

Discloser A 254 nm

| Peak  | Reten time (min) | Area (%) |
|-------|------------------|----------|
| 1     | 8.958            | 95.002   |
| 2     | 18.841           | 4.998    |
| total |                  | 100      |

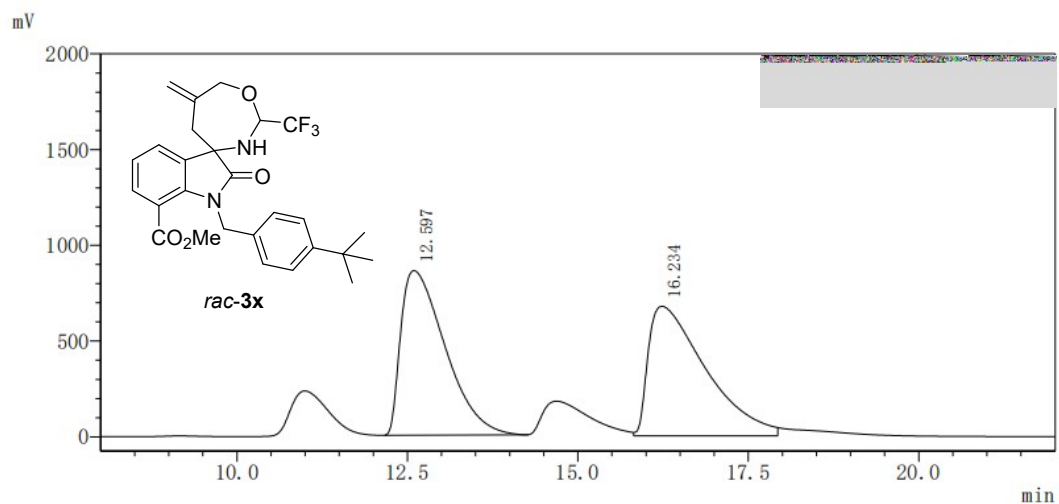

Discloser A 254 nm

| Peak  | Reten time (min) | Area (%) |
|-------|------------------|----------|
| 1     | 12.597           | 49.562   |
| 2     | 16.234           | 50.438   |
| total |                  | 100      |

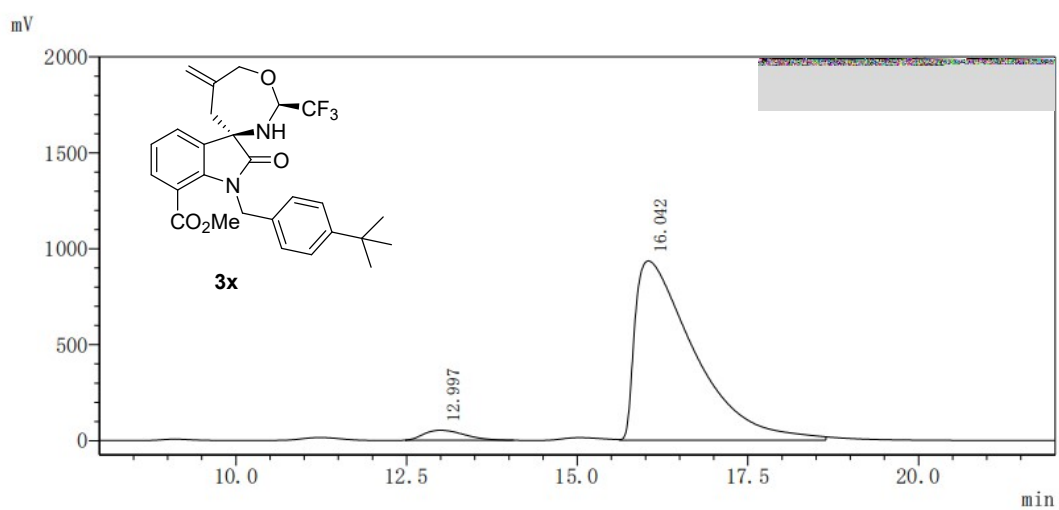

Discloser A 254 nm

| Peak  | Reten time (min) | Area (%) |
|-------|------------------|----------|
| 1     | 12.997           | 3.612    |
| 2     | 16.042           | 96.388   |
| total |                  | 100      |

## 7. Scale-up Synthesis

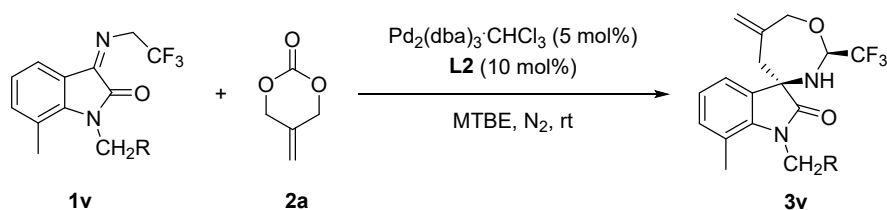

To a flame dried 25 mL sealing tube,  $\text{Pd}_2(\text{dba})_3 \cdot \text{CHCl}_3$  (0.005 mmol, 15.6 mg), **L2** (0.01 mmol, 16.2 mg), freshly distilled anhydrous MTBE (10.0 mL) were added. The resulting mixture was allowed to stir for 30 min. Then, compound **1v** (2 mmol) and compound **2a** (3 mmol) were added subsequently. The resulting reaction mixture was stirred at room temperature for 24 h (monitored by TLC). The residue was subjected to column chromatography on silica gel, using a mixture of petroleum ether and ethyl acetate as eluent, to give desired product **3v**. yield 54%, dr > 20 : 1, ee = 86%.

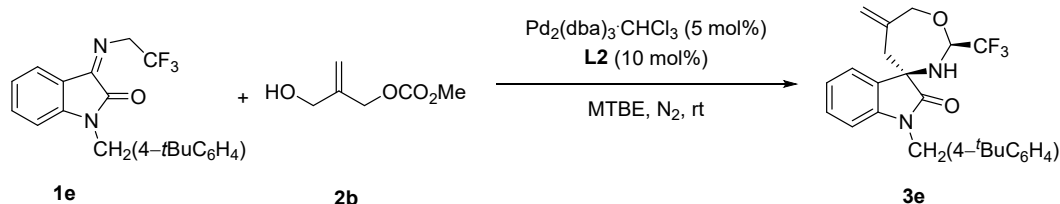

To a flame dried 10ml sealing tube,  $\text{Pd}_2(\text{dba})_3 \cdot \text{CHCl}_3$  (0.005 mmol, 5.4 mg), **L2** (0.01 mmol, 4.6 mg), freshly distilled anhydrous MTBE (1.0 mL) were added. The resulting mixture was allowed to stir for 30 min. Then, compound **1e** (0.1 mmol) and compound **2b** (0.15 mmol) were added subsequently. The resulting reaction mixture was stirred at room temperature for 8 h (monitored by TLC). The residue was subjected to column chromatography on silica gel, using a mixture of petroleum ether and ethyl acetate as eluent, to give desired product **3e**. yield 51%, dr=10:1, ee=94%; yellow oil.  $^1\text{H NMR}$  (300 MHz,  $\text{CDCl}_3$ ):  $\delta$  7.33 (d,  $J$  = 8.1 Hz, 3H), 7.21 (d,  $J$  = 8.1 Hz, 3H), 7.03 (t,  $J$  = 14.4 Hz, 1H), 6.77 (d,  $J$  = 7.8 Hz, 1H), 5.46 (dd,  $J$  = 10.2, 4.8 Hz, 1H), 5.26 (s, 1H), 5.02 (s, 1H), 4.93 (d,  $J$  = 15.6 Hz, 1H), 4.78 (d,  $J$  = 15.6 Hz, 1H), 4.60 (d,  $J$  = 13.2 Hz, 1H), 4.39 (d,  $J$  = 13.2 Hz, 1H), 2.94 (d,  $J$  = 13.8 Hz, 1H), 2.77 (d,

$J = 13.8$  Hz, 1H), 2.48 (d,  $J = 11.1$  Hz, 1H), 1.28 (s, 9H) ppm.  $^{13}\text{C}$  NMR (75 MHz,  $\text{CDCl}_3$ )  $\delta$  177.2, 150.7, 142.0, 140.6, 132.5, 131.7, 129.4, 126.9, 125.8, 122.8, 122.5 (q,  $J = 279.75$  Hz), 122.4, 119.1, 109.7, 82.2 (q,  $J = 33.00$  Hz), 74.1, 59.6, 44.6, 43.2, 34.5, 31.3 ppm.  $^{19}\text{F}$  NMR (282 MHz,  $\text{CDCl}_3$ )  $\delta$  -80.61 (d,  $J = 2.8$  Hz,) ppm.  
**HPLC** (Chiralpak AD-H, *n*-hexane/*i*-propanol = 99/1, flow rate = 1.0 mL/min,  $\lambda = 254$  nm) tR = 22.49 min (major), 29.42 min (minor).

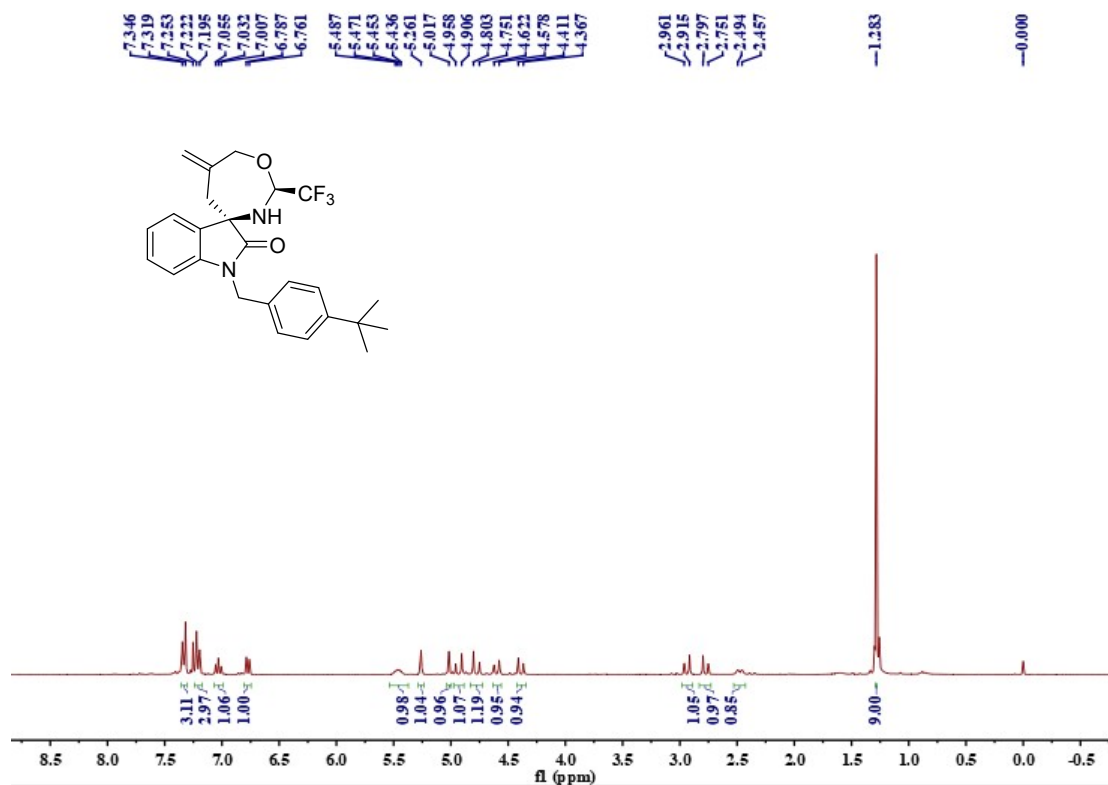

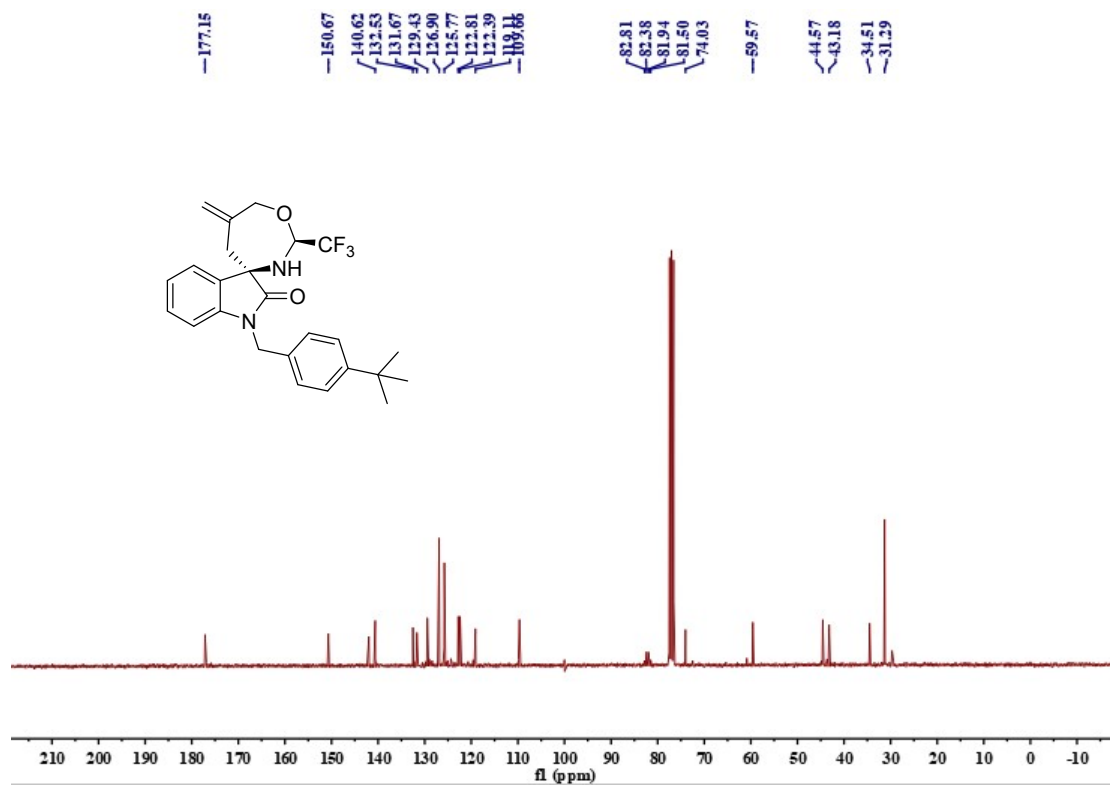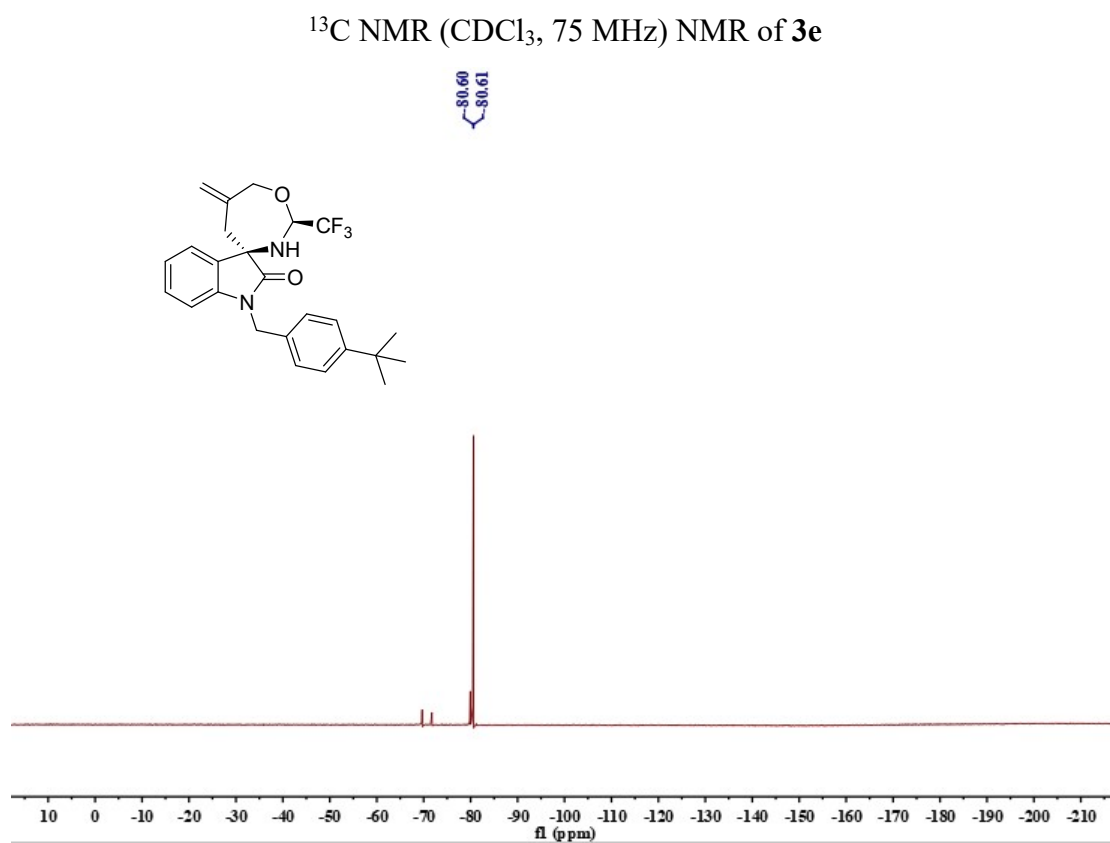

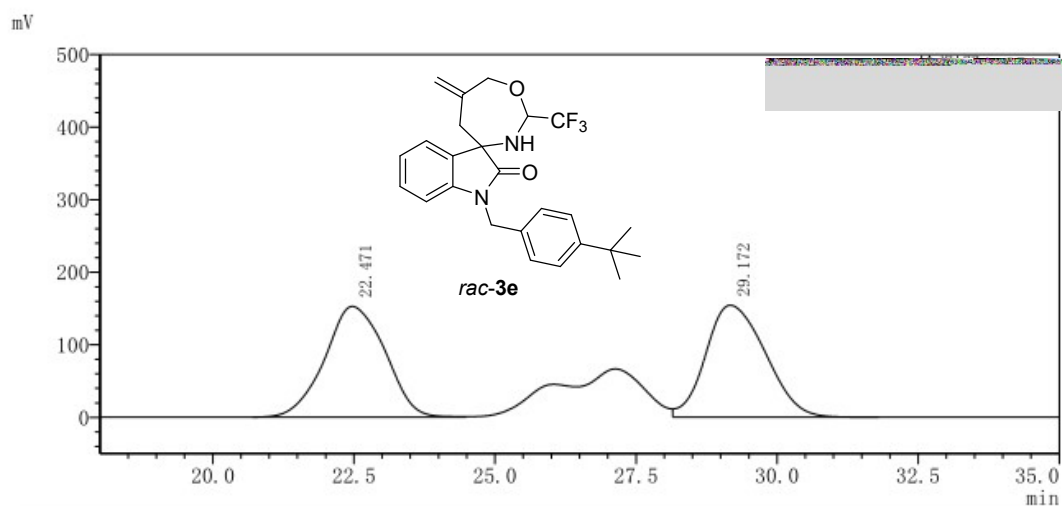

Discloser A 254 nm

| Peak  | Reten time (min) | Area (%) |
|-------|------------------|----------|
| 1     | 22.471           | 50.018   |
| 2     | 29.172           | 49.982   |
| total |                  | 100      |

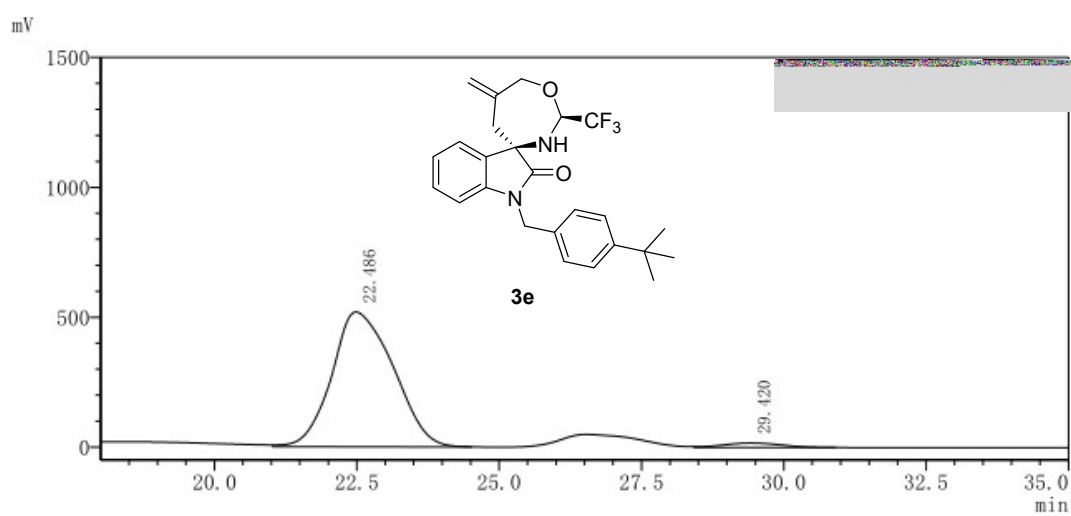

Discloser A 254 nm

| Peak  | Reten time (min) | Area (%) |
|-------|------------------|----------|
| 1     | 22.486           | 97.087   |
| 2     | 29.420           | 2.913    |
| total |                  | 100      |



## 8. X-ray crystal structure

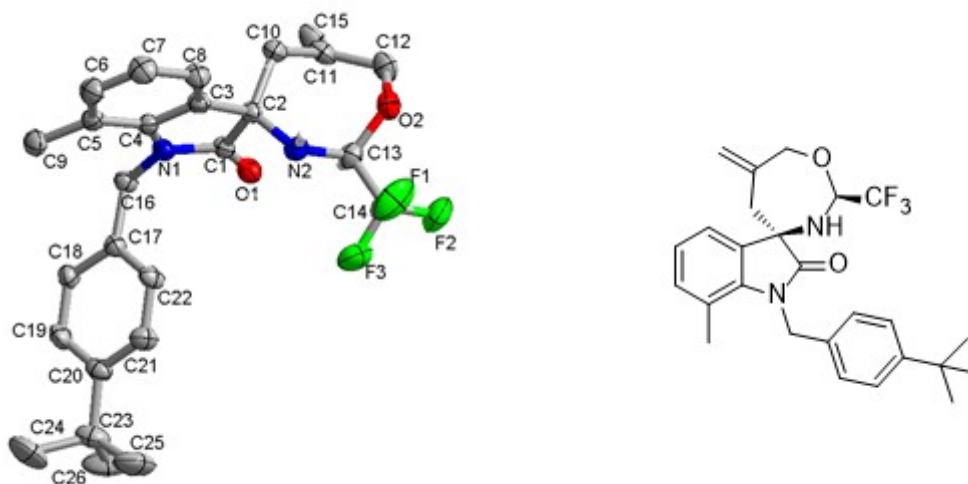

Crystal structure of **3v** (CCDC: 2132621)

| Table 1 Crystal data and structure refinement for <b>3v</b> CCDC: 2132621 |                                                                              |
|---------------------------------------------------------------------------|------------------------------------------------------------------------------|
| Identification code                                                       | 2132621                                                                      |
| Empirical formula                                                         | C <sub>26</sub> H <sub>29</sub> F <sub>3</sub> N <sub>2</sub> O <sub>2</sub> |
| Formula weight                                                            | 458.51                                                                       |
| Temperature/K                                                             | 293(2)                                                                       |
| Crystal system                                                            | trigonal                                                                     |
| Space group                                                               | P3 <sub>2</sub>                                                              |
| a/Å                                                                       | 10.6182(3)                                                                   |
| b/Å                                                                       | 10.6182(3)                                                                   |
| c/Å                                                                       | 18.9438(6)                                                                   |
| α/°                                                                       | 90                                                                           |
| β/°                                                                       | 90                                                                           |
| γ/°                                                                       | 120                                                                          |
| Volume/Å <sup>3</sup>                                                     | 1849.71(13)                                                                  |
| Z                                                                         | 3                                                                            |
| ρ <sub>calc</sub> /cm <sup>3</sup>                                        | 1.235                                                                        |

|                                                |                                                               |
|------------------------------------------------|---------------------------------------------------------------|
| $\mu/\text{mm}^{-1}$                           | 0.779                                                         |
| F(000)                                         | 726.0                                                         |
| Crystal size/ $\text{mm}^3$                    | $0.17 \times 0.13 \times 0.1$                                 |
| Radiation                                      | CuK $\alpha$ ( $\lambda = 1.54184$ )                          |
| 2 $\Theta$ range for data collection/ $^\circ$ | 9.618 to 142.158                                              |
| Index ranges                                   | $-12 \leq h \leq 10, -11 \leq k \leq 12, -22 \leq l \leq 23$  |
| Reflections collected                          | 11383                                                         |
| Independent reflections                        | 4668 [ $R_{\text{int}} = 0.0302, R_{\text{sigma}} = 0.0350$ ] |
| Data/restraints/parameters                     | 4668/59/319                                                   |
| Goodness-of-fit on $F^2$                       | 1.050                                                         |
| Final R indexes [ $I \geq 2\sigma(I)$ ]        | $R_1 = 0.0427, wR_2 = 0.1128$                                 |
| Final R indexes [all data]                     | $R_1 = 0.0504, wR_2 = 0.1226$                                 |
| Largest diff. peak/hole / $e \text{ \AA}^{-3}$ | 0.15/-0.13                                                    |
| Flack parameter                                | 0.09(11)                                                      |
